# Supplementary material for: HacA-Independent Functions of the ER Stress Sensor IreA Synergize with the Canonical UPR to Influence Virulence Traits in Aspergillus fumigatus
Source: PLoS Pathog. 2011 Oct 20;7(10):e1002330. doi: 10.1371/journal.ppat.1002330 (PMC3197630; doi:10.1371/journal.ppat.1002330)
Supplement: Figure S11 — Complete dataset. (XLS) [file ppat.1002330.s011.xls]

## Sheet: Table of contents
Sheet	Description
1	List of genes that show change in gene expression (Log2 values) in ΔireA mutant (but not in ΔhacA mutant) compared with wt during normal growth
2	List of genes that show change in gene expression (Log2 values) in ΔireA and ΔhacA mutants compared with wt during normal growth
3	List of genes that show change in gene expression (Log2 values) in ΔhacA mutant (but not in ΔireA mutant) compared with wt during normal growth
4	List of genes that show change in gene expression (Log2 values) when treated with 1mM DTT for 1h, but do not change during Tm treatment
5	List of genes that show change in gene expression (Log2 values) when treated with 10μg/ml Tm for 1h, but do not change during DTT treatment
6	List of genes corresponding to GO enrichment categories listed in figure 3
7	Change of Sre-responsive genes within our dataset
8	List of genes corresponding to KEGG pathway enrichment categories listed in table 2

## Sheet: 1
Locus	Common Name	ΔhacA / WT	ΔireA / WT
Afu8g01690	hypothetical protein	-0.369516	-3.63952
Afu3g13670	siderochrome-iron transporter, putative	-0.553993	-3.44928
Afu3g13690	pyoverdine chromophore biosynthetic protein, putative	-0.463392	-3.05381
Afu1g07480	coproporphyrinogen III oxidase, putative	-0.48416	-2.60841
Afu4g14380	glutathione S-transferase	0.132653	-2.52541
Afu5g02700	multidrug resistant protein	0.321978	-2.51941
Afu3g13680	conserved hypothetical protein	-0.509765	-2.38085
Afu6g03400	hypothetical protein	-0.491898	-2.27732
Afu6g12730	integral membrane protein	-0.498758	-2.26242
Afu7g02220	hypothetical protein	-0.502669	-2.1495
Afu7g01290	conserved hypothetical protein	-0.39681	-2.06604
Afu3g13700	transferase family protein	-0.514402	-2.04709
Afu3g12100	trehalose synthase (Ccg-9), putative	-0.179278	-2.04614
Afu5g13710	carboxylesterase, putative	0.347123	-1.99757
Afu6g09160	ubiquitin conjugating enzyme, putative	-0.469186	-1.96762
Afu8g01670	bifunctional catalase-peroxidase Cat2	-0.201741	-1.95355
Afu5g07780	squalene monooxygenase Erg1	-0.391671	-1.93333
Afu3g05760	C6 transcription factor (Fcr1), putative	0.127203	-1.93103
Afu7g05730	hypothetical protein	-0.381668	-1.91518
Afu3g07640	plasma membrane H+-ATPase	-0.0807201	-1.90864
Afu1g14930	hypothetical protein	-0.475833	-1.89503
Afu5g11190	hypothetical protein	-0.544387	-1.87142
Afu2g09650	aspartate transaminase, putative	-0.491107	-1.84725
Afu2g16440	hypothetical protein	-0.488836	-1.8299
Afu3g01900	conserved hypothetical protein	0.0486189	-1.82674
Afu5g10660	pentatricopeptide repeat protein	-0.237714	-1.81846
Afu4g12930	ubiquinone biosynthesis monooxgenase (Coq6), putative	-0.483619	-1.81732
Afu2g09220	hypothetical protein	-0.162997	-1.80451
Afu1g13750	C2H2 transcription factor (Rpn4), putative	0.0225312	-1.7997
Afu6g13380	arrestin (or S-antigen), N-terminal domain protein	-0.398383	-1.78421
Afu3g14540	heat shock protein HSP30, putative	-0.390438	-1.75423
Afu1g13400	conserved hypothetical protein	-0.205917	-1.74857
Afu3g11550	LEA domain protein	-0.557018	-1.74566
Afu7g06280	conserved hypothetical protein	-0.0220366	-1.73866
Afu3g03570	67 kDa myosin-cross-reactive antigen family protein	-0.473436	-1.73204
Afu5g14690	phosphorylase, putative	-0.32024	-1.72325
Afu3g15050	Flavin-binding monooxygenase, putative	-0.416859	-1.70729
Afu5g03330	conserved hypothetical protein	-0.0204318	-1.69122
Afu8g06750	CHIP6	-0.561141	-1.6783
Afu3g06250	RNA polymerase II mediator complex component Srb8, putative	-0.493797	-1.65889
Afu3g10750	acetate kinase, putative	-0.362303	-1.61994
Afu1g06020	DnaJ domain protein	0.337839	-1.61373
Afu4g11270	hypothetical protein	-0.525307	-1.5902
Afu2g17840	MFS transporter, putative	0.00515953	-1.58655
Afu8g02190	hypothetical protein	0.565092	-1.58627
Afu5g05640	RTA1 domain protein, putative	-0.337734	-1.57586
Afu2g03860	plasma membrane low affinity zinc ion transporter, putative	-0.537788	-1.52707
Afu7g02470	mRNA processing protein (Mss51), putative	-0.561849	-1.5059
Afu6g04470	hypothetical protein	-0.577886	-1.49754
Afu1g04450	siderophore biosynthesis protein, putative	0.0105718	-1.48708
Afu5g13740	protein phosphatase 2C, putative	-0.462917	-1.48698
Afu1g01720	protein kinase/ribonuclease IRE1, putative	-0.272586	-1.47875
Afu4g07280	related to SOK1 protein	-0.556722	-1.46318
Afu3g05740	aldose 1-epimerase, putative	-0.524848	-1.46306
Afu1g16850	sur2 protein	-0.572194	-1.4603
Afu5g06680	4-aminobutyrate aminotransferase	0.356983	-1.45431
Afu5g04210	ubiquinol-cytochrome C reductase complex core protein 2, putative	-0.520378	-1.44673
Afu8g05600	hypothetical protein	-0.494704	-1.442
Afu5g14200	hypothetical protein	-0.54733	-1.43603
Afu4g08580	antioxidant protein LsfA	-0.508227	-1.43124
Afu5g03550	plasma membrane H(+)ATPase, putative	-0.276059	-1.41801
Afu8g02440	C-4 methyl sterol oxidase, putative	-0.246505	-1.40309
Afu1g15640	hypothetical protein	-0.366161	-1.39563
Afu7g05880	hypothetical protein	-0.404379	-1.39196
Afu5g13750	caleosin domain protein	-0.556976	-1.38028
Afu5g10270	heat shock protein, HSP20 family	-0.381579	-1.36387
Afu1g07200	mitochondrial cytochrome b2, putative	-0.169297	-1.35061
Afu7g05350	delta-9 fatty acid desaturase; stearoyl-CoA desaturase	-0.529566	-1.34909
Afu8g02530	extracellular lipase, putative	0.19782	-1.3464
Afu7g05800	fructose-2,6-bisphosphatase	-0.366195	-1.34229
Afu4g09800	SYF2 splicing factor family protein	-0.182818	-1.34017
Afu4g00510	hypothetical protein	0.0947354	-1.33114
Afu6g10360	protein required for cell viability	-0.511171	-1.32575
Afu1g11970	mitochondrial dynamin GTPase (Msp1), putative	-0.473826	-1.31663
Afu1g10630	S-adenosylmethionine synthetase	-0.493758	-1.30795
Afu4g06400	pH signal transduction protein PalA, putative	-0.114513	-1.29824
Afu3g12760	hypothetical protein	-0.28747	-1.29267
Afu3g05770	RAS small monomeric GTPase, putative	-0.319203	-1.29069
Afu3g14490	Ketol-acid reductoisomerase	-0.205371	-1.2788
Afu1g05960	Peptidase family M28 family	0.200965	-1.27646
Afu6g02090	ATP synthase subunit E, putative	0.0209552	-1.27254
Afu6g08640	metallopeptidase Mip1	-0.246431	-1.27194
Afu3g03940	2,3-diketo-5-methylthio-1-phosphopentane phosphatase, putative	-0.0914483	-1.27105
Afu5g14800	lactate dehydrogenase	-0.540659	-1.26956
Afu6g03420	trehalose synthase, putative	-0.389416	-1.26547
Afu6g00220	fungal specific transcription factor, putative	-0.542851	-1.26346
Afu4g11560	vacuolar protein sorting-associated protein vps13	-0.341067	-1.26281
Afu1g03730	MFS transporter, putative	0.050372	-1.25937
Afu2g13690	ubiquitin conjugating enzyme, putative	-0.334097	-1.25591
Afu2g07520	leukotriene A4 hydrolase	0.150908	-1.24538
Afu5g09150	oxidoreductase, short-chain dehydrogenase/reductase family	-0.4078	-1.24504
Afu5g03310	hypothetical protein	-0.216819	-1.24474
Afu3g08880	conserved hypothetical protein	-0.575849	-1.24311
Afu5g14510	beta-lactamase, putative	-0.25489	-1.24218
Afu5g12080	hypothetical protein	-0.266771	-1.23829
Afu6g03640	aminotransferase, putative	-0.202218	-1.23707
Afu7g05960	C2H2 finger domain protein, putative	-0.404908	-1.23642
Afu6g07770	alanine aminotransferase, putative	-0.0349481	-1.23326
Afu1g04630	Similar to 50S ribosomal protein L6	-0.269883	-1.23202
Afu1g10090	hypothetical protein	-0.171716	-1.23127
Afu3g12720	sugar transporter-like protein	-0.541225	-1.22685
Afu8g06020	glutamate decarboxylase	-0.456468	-1.22388
Afu2g04190	conserved hypothetical protein	-0.0276941	-1.21321
Afu4g11710	oxidoreductase, zinc-binding dehydrogenase family superfamily	-0.287408	-1.21181
Afu6g12200	hypothetical protein	-0.446655	-1.20006
Afu1g06780	CBS and PB1 domain protein	-0.358012	-1.2
Afu1g04540	NADH-cytochrome b5 reductase precursor	-0.233659	-1.19722
Afu2g17830	hypothetical protein	-0.462397	-1.19317
Afu5g00600	NPP1 domain protein, putative	-0.406218	-1.18977
Afu1g05240	PHD finger and BAH domain protein (Snt2), putative	-0.0590135	-1.18915
Afu8g00440	steroid monooxygenase, putative	-0.276317	-1.18769
Afu5g11690	related to protein tyrosine phosphatase PPS1	-0.345027	-1.17902
Afu7g04760	gamma-glutamyltranspeptidase	-0.273458	-1.17034
Afu6g00660	FAD binding domain protein	-0.480857	-1.16881
Afu6g05140	sterol delta 5,6-desaturase ERG3	-0.129042	-1.16836
Afu3g13830	PH domain protein	-0.406436	-1.16462
Afu6g02180	GNAT family acetyltransferase, putative	-0.555	-1.15416
Afu8g02450	hypothetical protein	-0.128817	-1.1514
Afu5g12550	N-acetylglucosaminyl-phosphatidylinositol deacetylase, putative	-0.555402	-1.14866
Afu5g00500	maltose permease, putative	0.280461	-1.14226
Afu1g05830	TBP associated factor (Mot1), putative	-0.233122	-1.14206
Afu2g02310	sur7 protein, putative	-0.50477	-1.14093
Afu4g10340	C6 finger domain protein, putative	-0.220812	-1.13685
Afu3g02830	ankyrin repeat protein	-0.466404	-1.13092
Afu3g14660	hypothetical protein	0.0634087	-1.12884
Afu3g12270	glutathione peroxidase family protein	-0.184125	-1.11685
Afu1g12900	Leucine Rich Repeat domain protein	-0.229257	-1.11565
Afu3g01320	homocysteine S-methyltransferase, putative	-0.229065	-1.11403
Afu7g04610	Ulp1 protease family protein	-0.21243	-1.11371
Afu3g00380	beta-galactosidase, putative	-0.425191	-1.1119
Afu3g13730	nonribosomal peptide synthase, putative	-0.447453	-1.11131
Afu4g06420	fungal specific transcription factor, putative	-0.423938	-1.10829
Afu3g13710	GTP cyclohydrolase I, putative	-0.473944	-1.10585
Afu1g02730	mitochondrial phosphate carrier protein (Ptp), putative	-0.516709	-1.10358
Afu8g06130	FluG family protein	-0.141159	-1.10188
Afu1g10390	ABC multidrug transporter, putative	-0.533669	-1.09433
Afu4g10120	C6 finger domain protein, putative	0.0405279	-1.09275
Afu3g12080	ADP-ribosylation factor 6, putative	-0.167108	-1.08415
Afu1g12210	NADH oxidase	-0.476383	-1.08353
Afu4g09360	ATP synthase proteolipid P2, putative	-0.246741	-1.08259
Afu3g07960	alpha-ketoglutarate-dependent taurine dioxygenase	-0.0530831	-1.08191
Afu8g00520	integral membrane protein	-0.187669	-1.08069
Afu7g08580	dynamin GTPase, putative	-0.161978	-1.08028
Afu3g12560	allantoicase	0.00114856	-1.07344
Afu1g10210	hypothetical protein	-0.169271	-1.06967
Afu4g09510	conserved hypothetical protein	0.215805	-1.06939
Afu3g07270	hypothetical protein	-0.368961	-1.06587
Afu3g11590	Taz1-interacting factor 1 (TAF1), putative	-0.387407	-1.06238
Afu3g14260	mismatched base pair and cruciform DNA recognition protein, putative	-0.433486	-1.06141
Afu6g03630	fadD6	-0.015675	-1.05965
Afu2g03900	acetamidase/formamidase family protein	-0.383446	-1.05914
Afu8g05850	FAD dependent oxidoreductase superfamily	-0.561886	-1.05289
Afu1g15450	adenylosuccinate synthetase	-0.176741	-1.0522
Afu4g11700	Leucine Rich Repeat domain protein	-0.240217	-1.0516
Afu1g05840	hypothetical protein	-0.297259	-1.04998
Afu6g03820	nascent polypeptide-associated complex (NAC) subunit, putative	0.210119	-1.04968
Afu5g06470	serine/threonine protein kinase, putative	-0.354039	-1.0423
Afu5g07120	RNP domain protein	-0.173824	-1.04012
Afu5g09340	Phospholipase/Carboxylesterase superfamily	0.0295661	-1.0385
Afu8g04730	oligopeptidase family protein	-0.33899	-1.03669
Afu5g04230	citrate synthase, eukaryotic	-0.115843	-1.03253
Afu6g08850	ubiquinone biosynthesis methlytransferase Coq5, putative	-0.340615	-1.0322
Afu1g12330	Jmj domain protein, putative	-0.0714981	-1.03096
Afu1g10380	nonribosomal peptide synthase Afpes1	-0.153191	-1.03058
Afu5g07710	nuclear migration protein (ApsA), putative	-0.149843	-1.03021
Afu3g06410	Coq4p	-0.403495	-1.02802
Afu6g10230	FAD dependent oxidoreductase superfamily	-0.565402	-1.02779
Afu4g01350	hypothetical protein	-0.128573	-1.02106
Afu7g01260	conserved hypothetical protein	-0.178006	-1.02011
Afu5g09790	beta-lactamase	-0.363641	-1.01992
Afu3g13640	extracellular serine-rich protein	-0.468983	-1.0166
Afu4g10690	Iron-sulfur cluster assembly accessory protein	0.14664	-1.01546
Afu1g14300	Fasciclin domain family	-0.458728	-1.01291
Afu6g04640	hydrolase, alpha/beta fold family	-0.408469	-1.01222
Afu3g14120	hypothetical protein	-0.252922	-1.01133
Afu3g02450	hypothetical protein	0.133953	-1.00887
Afu3g11120	glutamic acid decarboxylase isoform 67	-0.252428	-1.00853
Afu1g10910	tubulin beta, putative	-0.179633	-1.0058
Afu4g08170	succinate-semialdehyde dehydrogenase, putative	0.565765	-1.00536
Afu2g02730	C2H2 finger domain protein, putative	-0.310026	-1.00266
Afu3g07660	conserved hypothetical protein	-0.0963846	-1.0017
Afu2g12910	PtaB protein, putative	-0.396645	-1.00095
Afu1g02550	tubulin alpha-1 subunit	-0.145896	-1.00042
Afu5g13560	FHA domain protein	-0.0942051	-0.999768
Afu8g05130	hypothetical protein	-0.468853	-0.994905
Afu5g00610	oxidase, putative	0.0805807	-0.994799
Afu2g17410	hypothetical protein	-0.234777	-0.992347
Afu3g11370	mitochondrial large ribosomal subunit L49, putative	-0.4322	-0.991512
Afu7g01520	BolA domain protein	-0.465467	-0.991092
Afu8g01270	beta-lactamase, putative	-0.199199	-0.990781
Afu6g09300	C2H2 finger domain protein, putative	-0.343905	-0.988441
Afu5g08160	cyclin domain protein	-0.400585	-0.98679
Afu3g07720	hypothetical protein	-0.0790147	-0.986191
Afu2g18050	FAD binding oxidoreductase, putative	-0.264454	-0.984856
Afu5g08170	autophagocytosis protein Aut1, putative	-0.124863	-0.983795
Afu8g01370	methyltransferase, putative	0.481286	-0.983766
Afu4g09190	S-adenosyl-methionine-sterol-C- methyltransferas	0.0399401	-0.983641
Afu8g01390	glycosyl hydrolase, family 15	-0.452376	-0.979938
Afu3g12530	sensor histidine kinase/response regulator, putative	-0.0377825	-0.978797
Afu8g01960	hypothetical protein	-0.150903	-0.978718
Afu1g12290	possible NADH-ubiquinone oxidoreductase	-0.394141	-0.975287
Afu3g00440	F-box domain protein	-0.278301	-0.974401
Afu3g12950	FAD binding domain protein	-0.308858	-0.972123
Afu4g07170	cut8 protein	-0.0758956	-0.970704
Afu3g04040	hypothetical protein	0.477262	-0.967182
Afu4g09810	hypothetical protein	-0.279064	-0.963817
Afu5g11010	nucleoside diphosphatase (Ynd1), putative	-0.0273127	-0.961938
Afu7g01810	C6 transcription factor, putative	-0.198655	-0.961692
Afu3g12090	hypothetical protein	-0.374306	-0.960528
Afu3g14170	high-affinity hexose transporter	-0.477677	-0.959229
Afu6g08940	hypothetical protein	-0.382597	-0.958092
Afu5g06270	5-aminolevulinic acid synthase	-0.176755	-0.957705
Afu3g11730	hypothetical protein	-0.523429	-0.956395
Afu4g13180	TPR repeat protein	-0.262631	-0.951409
Afu3g10400	dolichol-phosphate mannosyltransferase, putative	-0.490138	-0.950687
Afu7g06840	class III aminotransferase	0.147071	-0.950684
Afu6g03310	hypothetical protein	-0.373393	-0.949986
Afu4g11660	PHD finger domain protein (Ing1), putative	-0.231081	-0.949661
Afu3g15340	hypothetical protein	-0.197773	-0.949265
Afu3g06730	MFS sugar transporter, putative	-0.360295	-0.946258
Afu5g10180	monooxygenase, putative	0.0255897	-0.944343
Afu3g06340	COX1 assembly protein Shy1, putative	-0.124851	-0.9425
Afu4g07060	acyl-CoA thioester hydrolase, putative	-0.459377	-0.942204
Afu7g00150	FAD-dependent monooxygenase, putative	0.24188	-0.941961
Afu4g06010	n-terminal acetyltransferase 2	-0.0825105	-0.941941
Afu1g17610	hypothetical protein	-0.1851	-0.940682
Afu6g08660	hypotetical protein	0.0868918	-0.940057
Afu2g08250	glycerol 3-phosphate dehydrogenase (GfdB), putative	-0.511203	-0.939257
Afu3g00120	amino acid transporter, putative	-0.336923	-0.93518
Afu5g11160	oxidoreductase, 2OG-Fe(II) oxygenase family, putative	0.260003	-0.933318
Afu8g05980	protein kinase, putative	-0.442089	-0.93194
Afu6g14510	monooxygenase, putative	0.294971	-0.931906
Afu5g14850	conserved hypothetical protein	-0.14783	-0.931504
Afu7g01530	fadD36	-0.322565	-0.931147
Afu4g07920	hypothetical protein	0.325107	-0.931014
Afu6g10090	D-isomer specific 2-hydroxyacid dehydrogenase family protein	-0.411062	-0.929499
Afu4g11280	DUF409 domain protein	0.201991	-0.929227
Afu7g05230	conserved hypothetical protein	-0.253221	-0.927979
Afu1g01770	short chain oxidoreductase/dehydrogenase, putative	-0.0532811	-0.927675
Afu6g08080	glycosyl hydrolase, family 15	-0.318956	-0.926939
Afu1g14620	Fibronectin type III domain protein	-0.125729	-0.926137
Afu1g17570	urea active transporter, putative	0.0558621	-0.924019
Afu6g10860	hypothetical protein	-0.384235	-0.922563
Afu5g10610	ubiquinol-cytochrome c reductase iron-sulfur subunit precursor	-0.400839	-0.922231
Afu5g14170	hypothetical protein	0.120432	-0.920722
Afu8g00650	LPS glycosyltransferase, putative	-0.0892744	-0.920633
Afu8g06280	casein kinase family protein	-0.10132	-0.919084
Afu1g12180	CaNAG6	-0.117604	-0.918833
Afu1g04090	FAD dependent oxidoreductase, putative	-0.02908	-0.918119
Afu4g08150	hypothetical protein	0.0474778	-0.917442
Afu5g10580	SH3 domain protein	-0.191875	-0.917328
Afu5g01630	major facilitator superfamily	-0.116876	-0.914987
Afu7g05920	stearic acid desaturase (SdeA), putative	-0.103419	-0.911578
Afu5g14710	hypothetical protein	-0.204195	-0.910606
Afu7g01980	sinapyl alcohol dehydrogenase	0.258084	-0.909878
Afu7g07000	fumarylacetoacetate hydrolase family protein	-0.201545	-0.908475
Afu6g02470	fumarate hydratase, putative	-0.525461	-0.906146
Afu6g12460	conserved hypothetical protein	-0.213252	-0.905331
Afu4g10620	4-hydroxyphenylpyruvate dioxygenase, putative	-0.311567	-0.903461
Afu6g06680	hol1 protein, putative	-0.182228	-0.902149
Afu4g07890	hypothetical protein	-0.219692	-0.898551
Afu4g00580	hypothetical protein	0.0535963	-0.898249
Afu3g06110	proteasome regulatory particle subunit (RpnC), putative	-0.296089	-0.89651
Afu4g09060	phosphatidate cytidylyltransferase, putative	-0.0749355	-0.894861
Afu6g06840	hypothetical protein	-0.343332	-0.894649
Afu1g04620	alcohol dehydrogenase, zinc-containing, putative	-0.306839	-0.894015
Afu7g02110	RanBPM	-0.177474	-0.893356
Afu7g02460	extracellular serine-rich protein	-0.314428	-0.892352
Afu1g00770	conserved hypothetical protein	-0.201328	-0.891934
Afu7g06270	cyanamide hydratase	-0.398499	-0.891827
Afu4g12540	hypothetical protein	-0.000473	-0.889234
Afu7g05240	PROBABLE O-SIALOGLYCOPROTEIN ENDOPEPTIDASE	-0.410661	-0.886448
Afu5g14730	aldo-keto reductase (AKR13), putative	-0.144394	-0.886427
Afu3g10610	hypothetical protein	-0.100638	-0.886056
Afu4g00440	short chain dehydrogenase, putative	-0.510981	-0.885911
Afu6g03490	phenol 2-monooxygenase, putative	-0.0358016	-0.885661
Afu6g09590	zinc-containing alcohol dehydrogenase, putative	0.0173838	-0.885245
Afu1g14160	hypothetical protein	-0.272572	-0.884657
Afu4g10370	3-demethylubiquinone-9 3-methyltransferase	-0.0126226	-0.883591
Afu5g12810	mitochondrial large ribosomal subunit YmL35, putative	-0.212456	-0.882963
Afu8g07080	elastinolytic metalloproteinase Mep	-0.2813	-0.882887
Afu3g00840	FAD-dependent oxygenase, putative	-0.119901	-0.882743
Afu5g12940	arylsulfatase, putative	0.0438674	-0.882206
Afu6g10070	PEX11 domain protein	-0.143833	-0.881994
Afu2g17940	MAK1-like monooxygenase, putative	-0.0162514	-0.880854
Afu1g10190	pre-mRNA splicing factor (Prp31), putative	0.406862	-0.880685
Afu5g09900	RTA1 domain protein, putative	-0.184012	-0.880601
Afu1g17390	hypothetical protein	-0.369391	-0.877294
Afu5g11320	thioredoxin, putative	-0.152967	-0.876962
Afu3g14510	rhamnogalacturonan acetylesterase, putative	0.411413	-0.876434
Afu8g05590	oxidoreductase, short chain dehydrogenase/reductase family	-0.174179	-0.875124
Afu1g05190	hypothetical protein	-0.0408131	-0.874913
Afu8g01790	integral membrane protein, putative	0.131746	-0.874705
Afu7g08510	extracellular alpha-1,3-glucanase/mutanase, putative	-0.0128324	-0.872185
Afu1g04550	HMG box protein, putative	-0.517205	-0.871502
Afu3g02890	MFS sugar transporter, putative	-0.0672832	-0.870621
Afu4g09220	flavin-binding monooxygenase-like protein	-0.370925	-0.870393
Afu3g07230	DNA / pantothenate metabolism flavoprotein, putative	0.102352	-0.869123
Afu8g02250	hypothetical protein	-0.227759	-0.868877
Afu4g11800	alkaline serine protease Alp1	0.116034	-0.867908
Afu4g00960	6-phosphofructokinase alpha subunit	-0.364315	-0.867459
Afu5g11360	AP-3 adaptor complex subunit beta, putative	0.15759	-0.866355
Afu8g06970	beta-glucosidase	0.155352	-0.866208
Afu1g05800	MAP kinase kinase (Mkk2), putative	-0.18118	-0.864958
Afu7g06710	hypothetical protein	0.244761	-0.864618
Afu1g11250	amidohydrolase, putative	-0.197037	-0.864579
Afu1g12320	hypothetical protein	0.0253637	-0.863614
Afu3g12910	O-methyltransferase (GliM), putative	-0.258764	-0.863506
Afu7g00680	hypothetical protein	-0.132146	-0.862667
Afu1g02000	DNA mismatch repair protein Msh4, putative	-0.101253	-0.862527
Afu7g04490	Ribosomal protein S28e	-0.209494	-0.862091
Afu5g07160	DUF636 domain protein	0.0251813	-0.862005
Afu5g09920	peptidase, putative	-0.0779759	-0.86188
Afu3g15140	isocitrate dehydrogenase family protein	-0.0449372	-0.859049
Afu1g17210	hypothetical protein	-0.215038	-0.857667
Afu1g00660	hypothetical protein	-0.28812	-0.856676
Afu6g02190	transcriptional activator (PtaC), putative	-0.249523	-0.855284
Afu5g01270	C6 transcription factor, putative	-0.357612	-0.854988
Afu2g14530	esterase D	-0.446918	-0.854964
Afu1g16080	hypothetical protein	0.185153	-0.854007
Afu2g05450	64 kDa mitochondrial NADH dehydrogenase	-0.357248	-0.853352
Afu2g16430	hypothetical protein	-0.172685	-0.852981
Afu6g08730	6-phosphogluconate dehydrogenase, decarboxylating	-0.553898	-0.852712
Afu3g08490	ThiJ/PfpI family protein	-0.180021	-0.851775
Afu6g12470	Golgi transport complex subunit Cog6, putative	-0.202212	-0.850317
Afu1g07230	DSBA-like thioredoxin domain protein	-0.206952	-0.850173
Afu1g03940	signal recognition particle, putative	-0.000523	-0.850073
Afu5g07770	pentatricopeptide repeat protein	-0.338813	-0.848919
Afu6g09640	aminotransferase GliI	-0.0561378	-0.848717
Afu1g08910	DUF1680 domain protein	-0.0280389	-0.848626
Afu3g14350	GTP binding protein Guf1, putative	-0.222733	-0.848313
Afu7g08480	DNA dependent ATPase (Ris1), putative	-0.157546	-0.8468
Afu3g07000	conserved hypothetical protein	-0.489522	-0.846059
Afu1g03690	4-carboxymuconolactone decarboxylase family protein	-0.275246	-0.84599
Afu2g00650	arabinosidase	-0.101881	-0.845947
Afu5g03170	hypothetical protein	-0.265668	-0.845838
Afu4g14480	hypothetical protein	0.0662985	-0.845565
Afu3g09190	aldehyde reductase I (ARI), putative	-0.261881	-0.845402
Afu4g13470	hypothetical protein	-0.355448	-0.845338
Afu8g01800	Thiosulfate sulfurtransferase	-0.127135	-0.844401
Afu5g10810	Sec1 family superfamily	-0.17627	-0.843664
Afu1g15140	mitochondrial phosphate carrier protein (Mir1), putative	-0.131183	-0.843213
Afu4g07030	hypothetical protein	-0.0991384	-0.84321
Afu2g01590	non-classical export protein (Nce2), putative	-0.34021	-0.842648
Afu3g14650	LipA and NB-ARC domain protein	0.0952017	-0.842422
Afu5g10960	conserved hypothetical protein	-0.223364	-0.839742
Afu6g10350	hypothetical protein	0.0319522	-0.837798
Afu1g02500	origin recognition complex subunit Orc5, putative	0.0433678	-0.837207
Afu8g05700	hypothetical protein	0.0377706	-0.837188
Afu2g11840	transcriptional corepressor (Cyc8), putative	-0.0276137	-0.837115
Afu7g04740	hypothetical protein	-0.443024	-0.836995
Afu1g17650	short chain dehydrogenase, putative	-0.362689	-0.836164
Afu3g06170	mating type protein MAT1-2-1	-0.161224	-0.83496
Afu8g02160	aldehyde dehydrogenase family protein	0.0616504	-0.834877
Afu7g01670	MFS amino acid transporter, putative	-0.113763	-0.834492
Afu5g00150	nonribosomal peptide synthetase, putative	-0.258542	-0.834306
Afu2g16110	CCCH zinc finger protein	-0.397915	-0.834295
Afu2g15860	methyltransferase, putative	-0.303026	-0.831393
Afu4g01200	extracellular guanyl-specific ribonuclease, putative	0.239086	-0.830539
Afu8g06880	pectin methylesterase, putative	-0.478406	-0.830367
Afu7g06440	F-box domain protein	-0.492759	-0.830292
Afu4g00470	MFS multidrug transporter, putative	-0.350517	-0.830082
Afu3g15390	MFS transporter, putative	0.0935647	-0.829045
Afu1g02330	conserved hypothetical protein	0.0484621	-0.828546
Afu6g12230	conserved hypothetical protein	-0.0471884	-0.828069
Afu7g07040	hypothetical protein	-0.067719	-0.828012
Afu7g00710	oxalate/formate antiporter, putative	-0.441371	-0.827926
Afu8g07200	neutral amino acid permease	-0.107163	-0.826924
Afu6g09650	membrane dipeptidase GliJ	-0.334086	-0.826345
Afu2g09700	homocitrate dehydratase	-0.311949	-0.82631
Afu1g17440	ABC drug exporter AbcA	-0.379397	-0.824495
Afu1g16480	acid phosphatase, putative	-0.526362	-0.823367
Afu5g00340	ABC multidrug transporter, putative	-0.0142115	-0.822344
Afu3g11330	bZIP transcription factor (AtfA), putative	0.25472	-0.822253
Afu1g03610	hypothetical protein	-0.187167	-0.82069
Afu3g05700	Sec7 domain containing protein	-0.00854026	-0.820398
Afu6g11910	glycosyl hydrolase family 3, putative	-0.29776	-0.820077
Afu4g14830	cytochrome P450 monooxygenase, putative	-0.176701	-0.819704
Afu3g14610	cytochrome P450, putative	-0.145498	-0.819686
Afu1g16710	fatty acid elongase (Gig30), putative	-0.433928	-0.819508
Afu8g01600	hypothetical protein	0.324959	-0.819427
Afu3g13570	conserved hypothetical protein	-0.0388993	-0.819307
Afu4g06940	Des-1 protein	-0.341405	-0.81909
Afu8g06300	hypothetical protein	-0.312468	-0.818874
Afu7g02350	C2 domain protein	-0.331123	-0.818791
Afu2g14860	epoxide hydrolase, putative	-0.158684	-0.818408
Afu8g06480	rhamnogalacturonan acetylesterase superfamily protein	-0.251911	-0.818221
Afu1g16220	C6 transcription factor, putative	-0.102481	-0.818026
Afu6g00710	MFS transporter, putative	-0.274613	-0.817396
Afu3g12520	conserved hypothetical protein	-0.559376	-0.8173
Afu7g07060	hypothetical protein	-0.22205	-0.817071
Afu5g03490	nucleoside diphosphate kinase	-0.492446	-0.81691
Afu5g13300	aspartic endopeptidase Pep1	0.40537	-0.816451
Afu3g14970	thioredoxin, putative	-0.454171	-0.816141
Afu7g05110	hypothetical protein	-0.149115	-0.814767
Afu5g12790	mitochondrial 3-hydroxyisobutyryl-CoA hydrolase, putative	-0.214768	-0.814747
Afu3g04210	fatty acid synthase alpha subunit, putative	0.297866	-0.81415
Afu4g11110	C2 domain protein	-0.367508	-0.814038
Afu5g00130	capsule polysaccharide biosynthesis protein, putative	-0.175647	-0.813136
Afu5g00460	conserved hypothetical protein	-0.0573353	-0.812685
Afu4g12410	HMG box protein, putative	-0.062483	-0.812684
Afu6g11620	formyltetrahydrofolate deformylase	-0.0337441	-0.812618
Afu1g14120	nuclear segregation protein (Bfr1), putative	0.329951	-0.811723
Afu6g14040	glycosyl transferase, putative	-0.313399	-0.811307
Afu4g11680	conserved hypothetical protein	-0.57886	-0.810745
Afu5g02180	cysteine synthase (o-acetylserine (thiol)-lyase) (csase)	-0.544291	-0.810332
Afu3g13740	HSP70 family protein	-0.161965	-0.810217
Afu4g11390	ubiquinol-cytochrome c reductase complex 17 kd protein	-0.378634	-0.809888
Afu4g11510	mannose-1-phosphate guanylyltransferase	0.0813867	-0.809524
Afu1g00980	FAD-dependent oxidase, putative	-0.396465	-0.809375
Afu4g14650	ribokinase	-0.221653	-0.809216
Afu5g03340	hypothetical protein	-0.162506	-0.808591
Afu2g11520	MFS monosaccharide transporter, putative	-0.120034	-0.807577
Afu1g17130	F-box domain protein	-0.406341	-0.806781
Afu5g00250	hypothetical protein	-0.272398	-0.806654
Afu1g06210	N-acetylglucosamine-phosphate mutase	-0.379178	-0.806181
Afu3g12680	hypothetical protein	0.356931	-0.805357
Afu4g00450	hypothetical protein	-0.38891	-0.805135
Afu5g14130	NmrA-like family protein	0.0338027	-0.804709
Afu4g09270	ankyrin repeat protein	-0.132138	-0.804457
Afu1g15650	hypothetical protein	0.149118	-0.802724
Afu5g01430	ThiJ/PfpI family protein	-0.163133	-0.800685
Afu7g08360	hypothetical protein	-0.0965753	-0.800571
Afu1g12530	oleate delta-12 desaturase	0.465678	-0.799608
Afu3g13220	hypothetical protein	0.0293637	-0.799056
Afu2g18010	cytochrome P450 monooxygenase, putative	-0.186419	-0.798573
Afu1g17730	zinc binding enoyl reductase, putative	-0.204373	-0.798167
Afu5g08380	hypothetical protein	-0.372763	-0.797867
Afu3g02310	pyrroline-5-carboxylate reductase	-0.0847676	-0.797792
Afu8g06410	MFS multidrug transporter, putative	-0.27096	-0.797791
Afu5g10430	MSF multidrug transporter, putative	-0.427182	-0.797693
Afu5g07350	hypothetical protein	0.279225	-0.796186
Afu6g10580	antigenic CFEM domain protein, putative	0.185159	-0.795972
Afu3g11170	CP2 transcription factor	0.280626	-0.795891
Afu7g05080	C6 transcription factor, putative	-0.343462	-0.795648
Afu1g05700	splicing factor 3B subunit 10 (SF3b10), putative	-0.405546	-0.795464
Afu8g06620	hypothetical protein	-0.4973	-0.795411
Afu6g03380	hypothetical protein	-0.269273	-0.79526
Afu5g11540	related to ribosomal protein S5	-0.431388	-0.794651
Afu3g06270	hypothetical protein	-0.219502	-0.794638
Afu5g06610	glutathione synthetase	0.252567	-0.794622
Afu3g12930	dimethylallyl tryptophan synthase (GliD), putative	0.168913	-0.794328
Afu4g14280	multicopper oxidase, putative	-0.254172	-0.793955
Afu6g02220	MFS toxin efflux pump, putative	-0.340562	-0.793679
Afu1g04670	related to suppressor protein PSP1	-0.210902	-0.793448
Afu2g00620	GDSL-like lipase/acylhydrolase domain protein	-0.123191	-0.793039
Afu5g14960	hypothetical protein	-0.203225	-0.792609
Afu7g06370	C6 transcription factor, putative	-0.0643678	-0.79236
Afu3g09740	integral plasma membrane protein, putative	-0.4785	-0.79145
Afu7g00260	squalene-hopene-cyclase, putative	-0.186533	-0.791231
Afu8g07240	MFS maltose permease, putative	0.0392722	-0.791041
Afu3g03440	MFS family siderophore transporter, putative	-0.401444	-0.790344
Afu5g03950	protein kinase, putative	-0.362212	-0.790339
Afu3g05370	dihydrolipoamide succinyltransferase, putative	-0.437505	-0.790165
Afu5g02950	conserved hypothetical protein	0.0636477	-0.790144
Afu1g13970	MFS transporter, putative	0.299247	-0.787923
Afu1g13530	hypothetical protein	-0.245124	-0.78699
Afu6g01910	C2H2 finger domain protein, putative	-0.177257	-0.786976
Afu6g03550	hypothetical protein	0.195091	-0.786807
Afu5g04180	hypothetical protein	-0.289077	-0.786639
Afu2g14680	hypothetical protein	-0.101873	-0.78591
Afu6g05120	glycogen synthase kinase-3, putative	0.325383	-0.785293
Afu8g06840	oxidoreductase, short chain dehydrogenase/reductase family	0.113313	-0.781705
Afu5g01210	amine oxidase, flavin-containing superfamily	-0.313737	-0.781022
Afu2g11580	mfs-multidrug-resistance transporter	0.0487568	-0.779107
Afu1g03190	hypothetical protein	0.0998704	-0.778787
Afu1g17250	conidial hydrophobin RodB	-0.171132	-0.77826
Afu5g10550	ATP synthase F1, beta subunit, putative	-0.39602	-0.778099
Afu4g07290	conserved hypothetical protein	-0.285748	-0.7769
Afu5g12720	ABC drug transporter, putative	0.146025	-0.776636
Afu6g12040	maltose permease, putative	-0.226498	-0.774659
Afu8g00360	NlpC/P60-like cell-wall peptidase, putative	-0.058055	-0.774413
Afu6g00130	MFS transporter, putative	0.24408	-0.773492
Afu6g00440	cation diffusion facilitator 3	-0.272998	-0.772977
Afu4g14770	squalene-hopene-cyclase, putative	-0.192775	-0.771862
Afu5g00480	fructan beta-fructosidase, putative	0.249271	-0.770673
Afu6g03760	HhH-GPD family base excision DNA repair protein	0.00222769	-0.770421
Afu1g07140	c-24(28) sterol reductase	-0.397378	-0.770101
Afu7g06160	hypothetical protein	0.0817856	-0.769963
Afu7g01570	hypothetical protein	-0.41306	-0.769945
Afu5g14860	cytochrome P450	-0.188827	-0.76927
Afu7g05410	thiamine pyrophosphokinase	-0.0577917	-0.768775
Afu3g05980	hypothetical protein	-0.0154516	-0.768434
Afu5g09310	Bax Inhibitor family protein	0.221179	-0.768263
Afu8g00730	transcription regulator (RTG2), putative	0.299751	-0.768256
Afu4g08330	aspartyl-tRNA synthetase, putative	-0.471522	-0.768078
Afu8g05840	fungal specific transcription factor, putative	0.125376	-0.767416
Afu3g06680	Lipoyltransferase, putative	-0.241148	-0.767275
Afu1g00940	Tc1-mariner class transposase, putative	-0.395765	-0.766241
Afu8g01660	hypothetical protein	-0.127507	-0.766079
Afu3g02720	MFS transporter, putative	-0.185388	-0.765761
Afu3g03390	siderophore biosynthesis lipase/esterase, putative	-0.239676	-0.765412
Afu5g02250	conserved hypothetical protein	0.0677814	-0.765022
Afu4g00950	RNA polymerase II mediator complex component SRB4, putative	0.0505681	-0.764929
Afu8g01510	conserved hypothetical protein	0.000128	-0.764533
Afu5g01000	oxidoreductase, 2OG-Fe(II) oxygenase family, putative	-0.098742	-0.764353
Afu5g03840	oxidoreductase, short chain dehydrogenase/reductase family	-0.159109	-0.764241
Afu8g01910	histidine acid phosphatase, putative	-0.537917	-0.762624
Afu1g16160	C6 transcription factor, putative	-0.101727	-0.76169
Afu3g11250	C2H2 transcription factor (Swi5), putative	-0.319317	-0.760884
Afu1g17080	acetyltransferase, GNAT family, putative	0.251106	-0.760118
Afu5g02310	alpha/beta hydrolase, putative	-0.437767	-0.760081
Afu7g06950	oxidoreductase, putative	-0.181798	-0.759857
Afu6g13350	NADPH oxidase (NoxA), putative	-0.18622	-0.758769
Afu3g14580	dUTPase, putative	-0.208626	-0.757195
Afu2g05350	major facilitator superfamily protein superfamily	-0.154654	-0.757082
Afu3g14030	alkaline phosphatase	0.0317428	-0.756147
Afu1g16170	hypothetical protein	-0.132582	-0.755461
Afu4g08250	Raffinose synthase or seed imbibition protein Sip1, putative	0.0822823	-0.754318
Afu1g05390	mitochondrial ADP,ATP carrier protein (Ant), putative	-0.154255	-0.754172
Afu3g13430	conserved hypothetical protein	-0.00830309	-0.753904
Afu3g07810	succinate dehydrogenase, flavoprotein subunit	-0.327847	-0.752996
Afu4g07940	oxidoreductase, 2-nitropropane dioxygenase family, putative	-0.0843862	-0.75272
Afu5g15020	arsenic methyltransferase Cyt19, putative	-0.393494	-0.752533
Afu2g12410	conserved hypothetical protein	-0.0487579	-0.752121
Afu5g03040	DnaJ domain protein	-0.444893	-0.751732
Afu1g11090	clr4 protein	-0.213519	-0.75163
Afu3g09630	asparaginyl-tRNA synthetase	-0.425879	-0.751282
Afu8g04550	sulfonate biosynthesis enzyme, putative	-0.424115	-0.751155
Afu3g15350	short chain dehydrogenase family protein, putative	0.0345322	-0.750784
Afu5g06390	adenosine kinase	-0.0693912	-0.750314
Afu5g10520	alpha-1,2-mannosidase family protein	-0.102336	-0.749262
Afu5g06570	hypothetical protein	-0.479276	-0.748945
Afu3g00110	succinate-semialdehyde dehydrogenase, putative	-0.298398	-0.748143
Afu4g06530	bZIP transcription factor (MetR), putative	0.0293181	-0.747072
Afu5g10710	conserved hypothetical protein	-0.0911694	-0.746763
Afu1g09040	intermediate filament protein (Mdm1), putative	-0.476581	-0.746536
Afu6g11220	TBC domain protein, putative	0.163786	-0.746068
Afu8g01250	acetyltransferase, GNAT family family	0.0347587	-0.745985
Afu5g00120	cytochrome P450 oxidoreductase/alkane hydroxylase, putative	-0.436039	-0.74592
Afu4g07120	cytochrome c1 heme lyase	-0.509632	-0.745767
Afu3g09030	SUAPRGA1	-0.453361	-0.745514
Afu4g06860	conserved hypothetical protein	-0.337996	-0.74531
Afu1g14130	hypothetical protein	0.0255664	-0.74459
Afu1g17540	short-chain dehydrogenase/reductase, putative	-0.264672	-0.744209
Afu3g09290	phosphoglycerate mutase, 2,3-bisphosphoglycerate-independent	0.0831233	-0.743835
Afu1g15820	fatty acid hydroxylase, putative	-0.4834	-0.743495
Afu2g00140	FAD monooxygenase, putative	-0.289827	-0.743221
Afu3g09240	CAIB/BAIF family enzyme	-0.15839	-0.742532
Afu3g11630	conserved hypothetical protein	0.0148922	-0.742476
Afu3g12550	sensor histidine kinase/response regulator, putative	-0.370499	-0.742405
Afu2g16860	membrane transporter	0.402451	-0.742042
Afu1g11920	SH3 domain protein, putative	-0.162455	-0.741874
Afu8g06040	hypothetical protein	-0.528592	-0.740812
Afu1g00320	hypothetical protein	-0.272677	-0.740741
Afu8g00540	hybrid polyketide synthase/nonribosomal peptide synthase, putative	-0.337722	-0.739918
Afu4g06550	RING finger domain protein (Znf1), putative	0.0803591	-0.739741
Afu7g08450	ornithine decarboxylase, putative	-0.142441	-0.739361
Afu3g06490	hypothetical protein	0.129391	-0.738887
Afu8g06340	hypothetical protein	0.0661339	-0.736949
Afu2g17680	hypothetical protein	-0.218702	-0.736709
Afu3g01910	cellobiohydrolase, putative	-0.312052	-0.736545
Afu4g11650	2-oxoglutarate dehydrogenase complex alpha subunit, putative	0.270121	-0.736287
Afu8g06440	fructosyl amino acid oxidase, putative	-0.562186	-0.734944
Afu3g08060	DUF1338 domain protein	-0.20625	-0.734725
Afu5g01480	Amidohydrolase family, putative	-0.394606	-0.733782
Afu4g14440	nonribosomal peptide synthase, putative	-0.0900957	-0.73348
Afu1g05330	F-box domain protein	-0.47247	-0.733254
Afu6g08700	beta glucosidase, putative	-0.519719	-0.731875
Afu8g04090	choline oxidase (CodA), putative	0.150407	-0.731808
Afu5g08020	HLH DNA binding protein (Penr2), putative	-0.0176428	-0.731272
Afu8g06800	hypothetical protein	-0.499923	-0.730787
Afu8g07250	pectin methylesterase family protein	-0.277912	-0.730296
Afu1g02140	glycogen debranching enzyme, putative	-0.369016	-0.729716
Afu3g10330	hypothetical protein	-0.0220154	-0.729279
Afu4g01570	neutral amino acid permease	-0.0598171	-0.729121
Afu2g12930	conserved hypothetical protein	-0.541973	-0.728125
Afu8g07180	C6 transcription factor, putative	-0.243947	-0.728124
Afu5g01030	glyceraldehyde 3-phosphate dehydrogenase (Ccg-7), putative	-0.346982	-0.72769
Afu2g04490	D-3-phosphoglycerate dehydrogenase	-0.39829	-0.727233
Afu8g06580	GABA permease	-0.0371526	-0.726229
Afu4g09040	high affinity methionine permease	-0.571839	-0.725828
Afu6g13780	multidrug resistant protein, putative	-0.0112543	-0.724886
Afu4g00480	MFS multidrug transporter, putative	-0.346652	-0.724499
Afu6g08230	DNL zinc finger protein	-0.391638	-0.724101
Afu5g09380	hypothetical protein	-0.0326599	-0.723884
Afu5g12950	MFS quinate transporter, putative	-0.17659	-0.723821
Afu5g08130	Protein transport protein SEC61 alpha subunit, putative	-0.336113	-0.723588
Afu3g03210	hypothetical protein	-0.178407	-0.723359
Afu7g05590	DUF890 domain protein	-0.383127	-0.721939
Afu5g03380	flavin dependent monooxygenase, putative	-0.389648	-0.721791
Afu4g08610	regucalcin homolog [imported]	-0.403999	-0.721209
Afu6g02900	Rad21/Rec8 N terminal domain protein	-0.0574263	-0.721004
Afu1g01370	glutathione S-transferase, putative	-0.560291	-0.7206
Afu3g08260	cohesin complex subunit (Psm1), putative	-0.344689	-0.72059
Afu3g14460	Rad51 family DNA repair protein, putative	-0.498523	-0.720236
Afu6g14070	extracellular glycine/serine-rich protein, putative	0.173264	-0.720205
Afu1g01760	integral membrane protein	-0.325618	-0.719724
Afu3g06670	pyridoxamine phosphate oxidase, putative	-0.0998963	-0.71963
Afu6g13140	3,4-dihydroxy-2-butanone 4-phosphate synthase	0.177619	-0.718839
Afu5g07180	conserved proline-glicine rich protein	-0.0557941	-0.718647
Afu1g01250	glucuronyl hydrolase, putative	-0.406609	-0.716681
Afu5g00490	hypothetical protein	-0.15797	-0.716282
Afu3g09080	Hypothetical protein	-0.0785555	-0.716194
Afu3g09730	hypothetical protein	-0.170374	-0.715938
Afu3g15210	endo-1,4-beta-xylanase, putative	-0.246573	-0.715421
Afu6g03300	hypothetical protein	-0.0688306	-0.714322
Afu2g14990	tubulin alpha-2 subunit	-0.290093	-0.71354
Afu2g05300	hypothetical protein	-0.302575	-0.713211
Afu4g07310	cytidylyltransferase family protein	-0.178915	-0.713168
Afu7g06020	non-repetitive nucleoporin, putative	0.00087	-0.712781
Afu2g17850	3-beta hydroxysteroid dehydrogenase/isomerase	-0.506225	-0.711116
Afu5g09990	C6 transcription factor, putative	-0.204444	-0.710826
Afu5g03290	hypothetical protein	0.256792	-0.708625
Afu3g07800	hypothetical protein	-0.142502	-0.708545
Afu4g10100	FAD binding domain protein	-0.30413	-0.708327
Afu2g05400	sugar hydrolase, putative	-0.257792	-0.708314
Afu1g01790	hypothetical protein	-0.560733	-0.70792
Afu4g00610	aryl-alcohol dehydrogenase, putative	-0.012687	-0.707762
Afu3g01210	ThiJ/PfpI family protein	-0.242625	-0.707592
Afu5g07890	Single-strand binding protein family domain protein	-0.530886	-0.707359
Afu5g02610	cytochrome P450, putative	-0.173193	-0.7073
Afu4g13580	gamma-glutamyltranspeptidase	0.0959077	-0.70701
Afu5g10690	monosaccharide transporter	-0.240646	-0.705475
Afu1g04930	hypothetical protein	0.335793	-0.704928
Afu6g07780	Copper fist DNA binding domain protein	0.00328148	-0.704855
Afu1g15770	anaphase promoting complex subunit 10 (APC10), putative	0.0331496	-0.704127
Afu3g08810	antiviral protein (Ski3), putative	-0.255651	-0.703652
Afu6g11950	hypothetical protein	-0.0708074	-0.703112
Afu3g07370	molybdopterin synthase large subunit CnxH	-0.525318	-0.702644
Afu2g01930	haloacid dehalogenase-like hydrolase, putative	0.0127544	-0.702527
Afu2g00380	GNAT family acetyltransferase, putative	-0.0869339	-0.702046
Afu5g00330	hypothetical protein	-0.0766971	-0.701585
Afu5g14580	Pfs, NACHT and Ankyrin domain protein	-0.506841	-0.7013
Afu3g03000	phosphatidylethanolamine-binding protein, putative	-0.184823	-0.701254
Afu5g12700	hypothetical protein	-0.0740728	-0.701089
Afu7g04580	TBC domain protein, putative	0.00496758	-0.700081
Afu1g01050	conserved hypothetical protein	-0.403409	-0.699874
Afu3g11130	RINT-1 family protein	0.506609	-0.699576
Afu4g00590	monooxygenase, putative	0.12251	-0.698731
Afu6g02950	Catalytic LigB subunit of aromatic ring-opening dioxygenase, putative	-0.296623	-0.698723
Afu1g13950	short-chain oxidoreductase, putative	-0.094107	-0.698351
Afu5g10210	hypothetical protein	-0.252807	-0.698306
Afu6g14600	beta-glucosidase, putative	0.00948848	-0.698271
Afu1g14040	blue light-inducible protein Bli-3	-0.383165	-0.69805
Afu7g06520	CAIB/BAIF family enzyme	-0.157776	-0.696709
Afu6g06730	l-fucose permease, putative	-0.180044	-0.695931
Afu8g07040	FAD-binding monooxygenase, putative	-0.3775	-0.695802
Afu1g09260	acetyltransferase, GNAT family family	-0.0823282	-0.695192
Afu1g17410	beta-glucosidase, putative	-0.382989	-0.694617
Afu3g00100	flavin-containing amine oxidase, putative	-0.291503	-0.693839
Afu4g14510	hypothetical protein	-0.218446	-0.693607
Afu8g06600	oxidoreductase	-0.207282	-0.693487
Afu3g01480	conserved hypothetical protein	-0.377842	-0.692992
Afu5g06670	related to L-fucose permease, putative	-0.144275	-0.692678
Afu7g00620	hypothetical protein	-0.158418	-0.692288
Afu7g01560	FAD dependent oxidoreductase, putative	-0.0488145	-0.691816
Afu6g10190	hypothetical protein	0.190602	-0.691694
Afu1g03000	MYND domain protein, putative	-0.0352957	-0.691585
Afu1g11930	protein kinase, putative	-0.262244	-0.690535
Afu4g08030	conserved hypothetical protein	-0.0334607	-0.689735
Afu7g06080	ubiE/COQ5 methyltransferase, putative	-0.455814	-0.689496
Afu1g10220	hypothetical protein	0.101704	-0.688556
Afu1g03950	cytochrome P450 sterol C-22 desaturase, putaitve	-0.0180762	-0.688542
Afu5g02100	hypothetical protein	-0.0845119	-0.688452
Afu6g09500	DnaJ domain protein	-0.147709	-0.687965
Afu8g05890	hydrophobin, putative	-0.131451	-0.687227
Afu4g00560	NAD binding Rossmann fold oxidoreductase, putative	0.122209	-0.686027
Afu5g11170	nucleosome remodeling complex ATPase subunit (Snf2h), putative	-0.185962	-0.685169
Afu1g12690	ABC multidrug transporter Mdr4	-0.225825	-0.684655
Afu2g10950	hypothetical protein	-0.253679	-0.684622
Afu8g06630	intermediate filament associated protein, putative	-0.233083	-0.684473
Afu1g00930	hypothetical protein	-0.354464	-0.684408
Afu1g06840	vacuolar membrane PQ loop repeat protein	-0.231226	-0.684117
Afu2g15720	hypothetical protein	-0.0731475	-0.683631
Afu4g07270	serine carboxypeptidase, putative	-0.383258	-0.683122
Afu2g00910	Pfs, NB-ARC and TPR domain protein	-0.203776	-0.68293
Afu3g06690	Rho GTPase Rho3	0.0934951	-0.682333
Afu3g00250	salicylate hydroxylase, putative	-0.239076	-0.681793
Afu1g16210	threonyl-tRNA synthetase	-0.384485	-0.681689
Afu1g06670	hypothetical protein	0.257067	-0.681174
Afu3g07390	hypothetical protein	-0.262925	-0.68116
Afu1g16050	conserved serine-proline rich protein	-0.0549501	-0.68089
Afu3g11290	hypothetical protein	-0.00979742	-0.680883
Afu4g01560	MFS myo-inositol transporter, putative	-0.280934	-0.68037
Afu7g08440	hypothetical protein	-0.411955	-0.680133
Afu1g16700	beta galactosidase, putative	-0.238339	-0.679523
Afu4g09920	conserved hypothetical protein	0.080658	-0.678684
Afu4g07820	methionyl-trna synthetase	-0.399405	-0.678419
Afu4g06170	conserved hypothetical protein	-0.0864289	-0.67742
Afu3g14590	copper amine oxidase	0.274567	-0.677224
Afu6g08060	hypothetical protein	-0.316966	-0.677195
Afu1g11690	conserved proline-rich protein	0.136292	-0.676583
Afu1g15010	AMP binding domain protein, putative	-0.0687274	-0.676381
Afu8g00460	methionine aminopeptidase, type I, putative	-0.183426	-0.676334
Afu7g04270	3'-5' exonuclease/helicase (WRN), putative	0.042675	-0.676302
Afu6g12310	conserved hypothetical protein	-0.39818	-0.675777
Afu1g06320	DUF887 domain protein	-0.450626	-0.675433
Afu5g14530	C6 transcription factor, putative	-0.153394	-0.675167
Afu3g10100	Sfrs4 protein	-0.310338	-0.675153
Afu1g02480	plasma membrane ATPase, putative	-0.0865593	-0.675048
Afu2g00830	short chain dehydrogenase/reductase	0.138805	-0.674689
Afu7g05420	CHCH domain protein	-0.55622	-0.674637
Afu4g09770	hypothetical protein	-0.217666	-0.674528
Afu5g07090	hypothetical protein	-0.170438	-0.674178
Afu5g13810	transulfuration enzyme family protein, putative	-0.282768	-0.67371
Afu8g00850	dihydroorotase, homodimeric type	-0.14692	-0.673405
Afu5g15040	hypothetical protein	-0.128028	-0.6734
Afu3g07350	hypothetical protein	-0.143441	-0.673312
Afu1g16280	mitochondrial F1F0-ATP synthase g subunit, putative	-0.406401	-0.673064
Afu3g09920	hypothetical protein	-0.0169491	-0.672769
Afu1g17270	ferric-chelate reductase (Fre2), putative	-0.0657549	-0.672752
Afu7g05100	hexose transporter protein	-0.285025	-0.672594
Afu4g08260	hypothetical protein	0.173837	-0.67228
Afu3g14110	nicotinamide N-methyltransferase Nnt1	-0.214202	-0.672253
Afu2g16350	thioesterase family protein	0.00905957	-0.671981
Afu5g04070	Spo11	0.144907	-0.67149
Afu6g10390	conserved leucine-rich repeat protein	-0.297725	-0.671445
Afu5g14350	c-24(28) sterol reductase	-0.188225	-0.670897
Afu1g12440	isoflavone reductase family protein CipA, putative	-0.0695352	-0.670472
Afu7g05830	MFS sugar transporter, putative	-0.148328	-0.670301
Afu5g14070	conserved hypothetical protein	0.0713799	-0.669929
Afu3g09460	hypothetical protein	-0.32317	-0.669105
Afu1g12940	MAP kinase (Osm1), putative	0.128093	-0.668977
Afu7g04150	CGI-136 protein	-0.14111	-0.666889
Afu3g12940	C6 transcription factor, putative	-0.221864	-0.666657
Afu3g10010	conserved hypothetical protein	0.0839746	-0.666462
Afu6g06650	tyrosine/serine protein phosphatase	0.0633083	-0.666067
Afu2g08840	terminal deoxynucleotidyl transferase, putative	-0.166409	-0.666062
Afu2g17430	oxidoreductase, 2-nitropropane dioxygenase family, putative	0.188045	-0.665573
Afu4g13200	conserved hypothetical protein	-0.124289	-0.665323
Afu6g12130	C6 transcription factor, putative	-0.256552	-0.665092
Afu1g13860	conserved hypothetical protein	-0.490145	-0.66445
Afu7g06390	maltose permease	-0.201908	-0.664157
Afu3g11760	MFS transporter, putative	-0.206149	-0.663904
Afu6g01900	flavin-binding monooxygenase-like protein	0.205183	-0.663894
Afu8g00190	cytochrome P450, putative	-0.0038436	-0.662591
Afu5g10850	hypothetical protein	0.0166696	-0.662101
Afu8g00130	hypothetical protein	-0.0212305	-0.6617
Afu2g00760	pectate lyase A	-0.144278	-0.66155
Afu3g02120	short-chain dehydrogenase/reductase family protein, putative	-0.211408	-0.660794
Afu8g07390	hypothetical protein	-0.140199	-0.660557
Afu6g07690	mRNA cap methyltransferase	0.151734	-0.660544
Afu1g03080	carboxylic ester hydrolase (Ppe1), putative	0.00227869	-0.660329
Afu7g00740	protein kinase, putative	-0.327867	-0.660311
Afu7g00230	MFS multidrug transporter, putative	-0.104809	-0.659597
Afu1g05060	uroporphyrinogen decarboxylase	-0.285115	-0.659592
Afu5g09490	mitochondrial ribosomal protein, putative	-0.128695	-0.659531
Afu3g02790	amidohydrolase family protein, putative	-0.199708	-0.659422
Afu4g12140	RNA methylase family UPF0020 protein	-0.358358	-0.659366
Afu7g04980	3-ketoacyl-acyl carrier protein reductase	-0.133963	-0.658824
Afu7g08460	MFS drug transporter, putative	-0.278278	-0.658636
Afu1g17230	conserved hypothetical protein	-0.236736	-0.658453
Afu5g10380	pectin lyase, putative	0.101266	-0.657921
Afu5g11440	hypothetical protein	-0.0256083	-0.65774
Afu4g09580	major allergen Asp F2	0.259162	-0.657703
Afu1g13370	aldo-keto reductase (AKR7), putative	0.122922	-0.657195
Afu7g02290	ER glycosyl hydrolase (Edem), putative	-0.239294	-0.656435
Afu7g00830	alpha/beta hydrolase, putative	0.0486833	-0.656092
Afu6g09530	hypothetical protein	-0.42026	-0.655868
Afu1g16230	MFS quinate transporter, putative	-0.428905	-0.655418
Afu2g03300	hypothetical protein	-0.520638	-0.654346
Afu1g17120	elongation factor-1 gamma	0.0653686	-0.653345
Afu3g07420	hypothetical protein	0.128911	-0.653275
Afu5g01180	RAN small monomeric GTPase, putative	-0.4056	-0.652388
Afu7g06920	NmrA family transcriptional regulator	0.0438423	-0.652134
Afu6g12100	nitrilase family protein	-0.170791	-0.651844
Afu3g05960	hypothetical protein	0.0300324	-0.650281
Afu6g13520	tryptophan synthase	-0.33283	-0.650156
Afu5g11830	mitochondrial ribosomal protein L11, putative	-0.423932	-0.649632
Afu2g05320	ion transporter	0.123469	-0.649032
Afu1g01000	oxidoreductase, 2OG-Fe(II) oxygenase family	-0.215135	-0.648726
Afu4g11050	NADH-ubiquinone oxidoreductase, subunit F, putative	-0.371453	-0.648324
Afu1g03590	importin 11, putative	0.161283	-0.647827
Afu4g14060	conserved hypothetical protein	-0.333193	-0.647724
Afu3g13750	conserved hypothetical protein	-0.434346	-0.647434
Afu6g02280	allergen Asp F3	-0.215475	-0.647271
Afu1g09810	PUA RNA binding domain protein, putative	0.0642606	-0.647107
Afu6g09370	RING finger protein	-0.366427	-0.646939
Afu7g00700	aldo-keto reductase (AKR13), puatative	0.0663136	-0.644898
Afu8g01050	lipase/esterase, putative	-0.286643	-0.644348
Afu2g16280	glutamyl-tRNA synthetase	-0.303235	-0.644132
Afu4g07050	L-lactate dehydrogenase	-0.126768	-0.643763
Afu3g14810	pathogenicity associated protein PEP2, putative	-0.187547	-0.642838
Afu5g09590	hypothetical protein	-0.41226	-0.64217
Afu8g06370	monooxygenase, putative	-0.359645	-0.64191
Afu1g03090	mitochondrial integral membrane protein	0.123437	-0.641522
Afu3g10130	sarcosine oxidase, putative	-0.1082	-0.640988
Afu7g01440	hypothetical protein	-0.299027	-0.640724
Afu6g02000	NCS1 allantoate transporter	-0.0812823	-0.640479
Afu3g03580	Transferase family superfamily	-0.312966	-0.639551
Afu6g14280	flavin-binding monooxygenase-like protein	-0.524661	-0.639486
Afu5g01710	cytochrome P450 phenylacetate 2-hydroxylase, putative	-0.209599	-0.639268
Afu1g06620	acyl carrier protein, putative	0.162568	-0.639199
Afu8g01210	enoyl-CoA hydratase/isomerase family protein	-0.101467	-0.639008
Afu2g18040	dimethylallyl tryptophan synthase, putative	-0.0984671	-0.63896
Afu1g08930	WD repeat protein	-0.301553	-0.638901
Afu1g12170	translation elongation factor EF-Tu, putative	-0.342574	-0.638736
Afu4g06340	CHD5 domain protein	-0.0555173	-0.638703
Afu1g06730	Lanthionine synthetase C-like protein superfamily	-0.378449	-0.63849
Afu8g06290	LINE-1 class reverse transcriptase, RNaseH, putative	-0.445198	-0.63848
Afu4g12960	hypothetical protein	-0.304262	-0.63837
Afu5g04030	mitochondrial ribosomal protein L2 precursor	-0.282549	-0.638144
Afu5g02130	alpha-galactosidase	-0.314899	-0.636324
Afu5g13850	small oligopeptide transporter, OPT family	0.219884	-0.63605
Afu1g15630	hypothetical protein	-0.0428743	-0.63601
Afu5g07870	hypothetical protein	-0.0760147	-0.635593
Afu5g10790	oxidoreductase, short chain dehydrogenase/reductase family	0.119156	-0.634696
Afu5g14610	carboxypeptidase Y, putative	-0.296036	-0.634649
Afu8g02420	hypothetical protein	0.0387697	-0.634595
Afu5g13190	kinesin family protein	-0.0885038	-0.633404
Afu4g01110	1,3-beta glucanase	-0.208892	-0.633374
Afu1g10120	ABC transporter permease protein	-0.292295	-0.632849
Afu1g03650	hypothetical protein	-0.185908	-0.632784
Afu6g09700	gliotoxin biosynthesis protein GliK	-0.285141	-0.632501
Afu3g10840	zinc knuckle transcription factor (Zfm1), putative	0.468512	-0.631791
Afu3g01400	ABC multidrug transporter, putative	-0.251782	-0.63004
Afu4g01590	hypothetical protein	-0.0735267	-0.629921
Afu3g14380	endosomal sorting complex protein TSG101, putative	-0.217107	-0.626761
Afu6g13610	endo-1,4-beta-xylanase, putative	-0.317263	-0.626671
Afu3g13290	hypothetical protein	-0.332771	-0.626395
Afu5g13030	Apc13 domain protein	-0.386476	-0.624718
Afu8g00490	polyketide synthase, putative	-0.0908633	-0.624594
Afu7g07130	hypothetical protein	-0.437036	-0.624496
Afu1g09150	rhomboid family protein, putative	-0.46518	-0.623551
Afu6g12620	related to ribosomal protein MRP49	0.199236	-0.622871
Afu4g12760	SAM binding motif containing protein	0.0534101	-0.622638
Afu5g01010	hypothetical protein	-0.114504	-0.622439
Afu3g10060	Dor1-like family protein	-0.166296	-0.62181
Afu1g14280	C6 finger domain protein, putative	0.270411	-0.620838
Afu3g10930	bZIP transcription factor (MeaB), putative	-0.0255298	-0.619603
Afu3g04100	zinc knuckle domain protein	-0.240905	-0.619432
Afu3g07260	esterase/lipase, putative	-0.428468	-0.619025
Afu1g12770	conserved hypothetical protein	0.272402	-0.618549
Afu6g06790	mannosyl-oligosaccharide alpha-1,2-mannosidase	0.0258778	-0.618427
Afu2g15140	MSF drug transporter, putative	-0.326675	-0.617999
Afu3g07330	essential protein Yae1	0.0171603	-0.617876
Afu8g01410	class V chitinase ChiB1	-0.287804	-0.61672
Afu6g08370	neutral sphingomyelinase	-0.133352	-0.616509
Afu6g13450	nitrilase	-0.348331	-0.616418
Afu5g01780	cell cycle protein, putative	0.180957	-0.615612
Afu3g01220	aspartic-type endopeptidase, putative	-0.096394	-0.615341
Afu6g13420	ubiquitin-like protein DskB, putative	-0.261966	-0.615042
Afu3g08840	coatomer alpha subunit, putative	-0.420899	-0.614805
Afu6g09410	conserved hypothetical protein	-0.416748	-0.61467
Afu3g04150	mitochondrial enoyl reductase, putative	-0.0421938	-0.614402
Afu8g07090	extracellular proline-serine rich protein	-0.380964	-0.614215
Afu2g09110	phenylalanine ammonia-lyase	-0.137257	-0.613995
Afu3g08850	FAD dependent sulfhydryl oxidase Erv1, putative	-0.0285202	-0.613659
Afu6g04070	hypothetical protein	0.188236	-0.613653
Afu8g05090	MFS transporter	-0.174113	-0.612553
Afu6g13630	conserved hypothetical protein	0.347012	-0.611537
Afu3g15380	MFS multidrug transporter	-0.305916	-0.611133
Afu6g11640	fungal specific transcription factor, putative	-0.263747	-0.611125
Afu6g00360	DUF453 domain protein, putative	-0.240922	-0.61094
Afu4g06110	hypothetical protein	-0.322504	-0.610508
Afu5g14920	hypothetical protein	-0.32779	-0.609281
Afu3g10940	peroxisomal membrane protein receptor Pex19, putative	-0.224505	-0.609068
Afu6g09670	cytochrome P450 oxidoreductase GliC	-0.364083	-0.608842
Afu1g09410	ribosomal protein L17	-0.198285	-0.608306
Afu3g10530	protein serine/threonine kinase (Ran1), putative	0.366402	-0.608243
Afu1g16430	hypothetical protein	-0.329241	-0.608089
Afu5g05510	cyclin-dependent protein kinase, putative	-0.450714	-0.6073
Afu8g01400	mitochondrial carrier protein (Pet8), putative	-0.452287	-0.606644
Afu7g04130	Trf5	0.0839227	-0.605364
Afu8g01100	Melibiase subfamily, putative	-0.289581	-0.604811
Afu8g04590	pre-mRNA splicing factor, putative	-0.244621	-0.603108
Afu1g01180	isoamyl alcohol oxidase	-0.183666	-0.602588
Afu2g09120	SNF2 family helicase, putative	-0.396911	-0.601809
Afu5g01580	oxidoreductase, short chain dehydrogenase/reductase family	-0.126671	-0.601793
Afu4g10510	mitochondrial chaperone Frataxin, putative	-0.316468	-0.601724
Afu4g10840	conserved hypothetical protein	-0.106385	-0.600854
Afu3g12440	hypothetical protein	0.00512063	-0.600748
Afu8g01860	hypothetical protein	0.500482	-0.599872
Afu6g02820	metalloreductase, putative	-0.0802107	-0.599703
Afu8g01380	NB-ARC and TPR domain protein	-0.441244	-0.599672
Afu3g07460	NACHT and WD domain protein	-0.0772937	-0.599415
Afu6g07380	conserved hypothetical protein	-0.175256	-0.599265
Afu3g06140	cytoskeleton assembly control protein Sla2, putative	-0.00172567	-0.598508
Afu6g07010	C6 transcription factor, putative	-0.231631	-0.59836
Afu6g07090	maleylacetate reductase, putative	-0.438383	-0.59771
Afu5g11750	LON domain serine protease, putative	-0.17032	-0.596203
Afu1g16110	arsenic methyltransferase Cyt19, putative	-0.38323	-0.596185
Afu7g05570	hypothetical protein	-0.172395	-0.596095
Afu2g12680	conserved hypothetical protein	-0.0550865	-0.594432
Afu8g02540	hypothetical protein	-0.265592	-0.594097
Afu5g01670	pathway-specific regulatory protein	0.0650922	-0.59357
Afu7g00640	aromatic ring-opening dioxygenase family protein	-0.374942	-0.592985
Afu3g09650	conserved hypothetical protein	-0.121302	-0.592391
Afu6g07100	diphthamide biosynthesis protein 2	0.179302	-0.591863
Afu3g12140	hypothetical protein	0.168565	-0.591587
Afu6g11630	FAD-dependent isoamyl alcohol oxidase, putative	-0.430514	-0.591445
Afu2g17620	cellobiose dehydrogenase	-0.170645	-0.591327
Afu6g11380	mitochondrial import receptor subunit (Tom20), putative	-0.446437	-0.591083
Afu1g01970	mutant VeA1 protein	-0.0628313	-0.5898
Afu2g00770	salicylate hydroxylase	-0.555919	-0.589648
Afu3g03130	hypothetical protein	-0.312242	-0.589089
Afu5g03730	hypothetical protein	0.126129	-0.588717
Afu2g12080	mitochondrial phosphate transporter, putative	-0.274002	-0.588051
Afu6g11600	endoglucanase, putative	0.179954	-0.587918
Afu7g04030	hypothetical protein	0.0533456	-0.587459
Afu3g11440	glutamyl-tRNA(Gln) amidotransferase, B subunit	-0.260858	-0.587243
Afu4g09560	ZIP Zinc transporter, putative	0.00236094	-0.587026
Afu8g04720	hypothetical protein	0.0685615	-0.586448
Afu2g18090	extracellular proline-rich protein, putative	-0.283989	-0.585554
Afu8g05000	bis(5'-nucleosyl)-tetraphosphatase	-0.103496	-0.585302
Afu2g09330	C6 finger domain protein, putative	-0.263505	-0.585038
Afu2g14320	HHE domain protein	0.230275	-0.584984
Afu2g15380	hypothetical protein	-0.00618086	-0.584138
Afu2g16320	multidrug resistant protein	-0.368866	-0.583898
Afu7g00510	hypothetical protein	0.0247002	-0.583368
Afu5g04330	aminopeptidase, putative	0.385136	-0.583181
Afu1g17200	nonribosomal peptide synthase, putative	0.398976	-0.583097
Afu6g02570	conserved hypothetical protein	-0.0725567	-0.582839
Afu1g05290	endo-1,3(4)-beta-glucanase, putative	-0.132638	-0.582515
Afu6g10590	ubiquitin-protein ligase (Asi3)	-0.558558	-0.58239
Afu6g04110	CLPTM1 domain protein	-0.454196	-0.581721
Afu1g01110	polyketide synthase, putative	-0.0142578	-0.58167
Afu4g07720	carboxylesterase, putative	-0.256644	-0.581588
Afu5g10130	bZIP transcription factor, putative	-0.415886	-0.580985
Afu3g04220	fatty acid synthase beta subunit, putative	0.466315	-0.580621
Afu5g09860	esterase, putative	-0.39034	-0.580509
Afu3g04250	qutg protein	-0.0569912	-0.580379
Afu8g02030	conserved hypothetical protein	-0.211179	-0.58015
Afu7g03920	hypothetical protein	0.105548	0.58155
Afu1g07550	ubiquitin C-terminal hydrolase family protein	-0.344356	0.581761
Afu1g04590	ada3 protein, putative	-0.290472	0.581901
Afu5g09370	hypothetical protein	0.104821	0.582022
Afu6g10260	aldehyde reductase (AKR1), putative	0.251187	0.582562
Afu4g11480	C2H2 finger domain protein, putative	0.339965	0.582902
Afu6g10830	protein phosphatase 2a	0.180595	0.583244
Afu6g14580	C6 finger domain protein, putative	0.243861	0.583715
Afu2g03420	mitochondrial translocase complex component (Tim50), putative	-0.0941585	0.583715
Afu2g10590	disulfide isomerase, putative	-0.454177	0.583782
Afu2g08900	voltage-gated chloride channel (ClcA), putative	-0.312856	0.584603
Afu8g05400	hypothetical protein	0.288017	0.584911
Afu4g12240	putitive nitrilase homolog	0.286741	0.584943
Afu1g07610	peroxisomal membrane protein pex16 (peroxin-16)	-0.389257	0.585301
Afu5g03970	hypothetical protein	0.00330018	0.585899
Afu4g08090	hypothetical protein	0.39681	0.586117
Afu3g08030	Met-10+ like-protein, putative	0.204109	0.586288
Afu1g04880	conserved hypothetical protein	0.00769647	0.586911
Afu8g03990	U5 snRNP component (116 kDa), putative	0.21796	0.587171
Afu4g06320	4F5 domain protein	0.107441	0.588143
Afu4g07540	small nucleolar ribonucleoprotein complex subunit, putative	0.0774123	0.589124
Afu7g05670	ribose-phosphate pyrophosphokinase pyrophosphate synthetase)	0.319182	0.589191
Afu7g01370	thiosulfate sulfurtransferase, putative	-0.0828554	0.589404
Afu6g13870	hypothetical protein	-0.0607797	0.590048
Afu2g08650	RING finger membrane protein	0.430169	0.590257
Afu7g02180	UDP-N-acetylglucosamine pyrophosphorylase	0.198567	0.590631
Afu2g12010	pentatricopeptide repeat protein	-0.426286	0.590876
Afu5g10890	DNA replication licensing factor Mcm6, putative	0.554064	0.59174
Afu7g02270	BET3 family protein	-0.337615	0.591886
Afu6g02400	MFS drug efflux pump, putative	-0.149306	0.592319
Afu1g03030	hypothetical protein	0.482928	0.592516
Afu4g12370	hypothetical protein	-0.351462	0.594872
Afu4g05980	JmjC domain protein, putative	-0.00200508	0.595015
Afu5g09820	mariner class transposase, putative	0.0217494	0.595067
Afu5g01940	R3H domain protein, putative	0.358035	0.59552
Afu2g06030	ribosomal protein S18 domain protein	-0.206865	0.596457
Afu1g15070	conserved hypothetical protein	0.427503	0.596825
Afu1g03760	DUF726 domain protein	0.206856	0.596985
Afu5g01160	monosaccharide transporter	0.00646186	0.597016
Afu2g05500	NADH-ubiquinone oxidoreductase 18 kDa subunit, putative	-0.0972602	0.597186
Afu3g00450	hypothetical protein	0.239476	0.597277
Afu3g12050	F-box domain protein	-0.278682	0.597638
Afu7g00970	GPI-anchored serine-threonine rich protein	-0.165235	0.598543
Afu3g10380	RNA polymerase III transcription factor, putative	0.111184	0.599716
Afu1g04100	hypothetical protein	-0.111545	0.599956
Afu4g00930	CorA family metal ion transporter, putative	0.114845	0.600405
Afu2g09840	folic acid synthesis protein	-0.0848878	0.600676
Afu2g01220	GTP cyclohydrolase II, putative	0.335404	0.602509
Afu7g04320	UBX domain protein (Ubx5), putative	0.444774	0.6031
Afu1g07700	MFS monosaccharide transporter, putative	-0.063699	0.604762
Afu2g04830	conserved hypothetical protein	0.00163841	0.605437
Afu2g03580	phenylalanyl-tRNA synthetase beta chain cytoplasmic	0.403698	0.606784
Afu2g04840	BSD domain protein	-0.19389	0.607112
Afu2g05860	calcium/mangenease P-type ATPase, putative	-0.164537	0.607241
Afu2g05040	glycerol:H+ symporter (Gup1), putative	-0.0724124	0.607813
Afu4g06100	conserved hypothetical protein	-0.144859	0.608165
Afu5g04310	peroxisomal membrane protein Pmp47, putative	0.181784	0.608653
Afu4g08830	telomere length regulator protein (Rif1), putative	0.321834	0.60966
Afu1g14980	hypothetical protein	-0.0796296	0.609752
Afu4g07340	ubiquitin fusion degradation protein UfdB, putative	0.361874	0.609789
Afu2g15750	gamma-tubulin complex component GCP4, putative	0.156058	0.609941
Afu6g00520	conserved hypothetical protein	0.546792	0.610746
Afu4g08860	hypothetical protein	0.313756	0.611885
Afu4g08080	hypothetical protein	0.195289	0.612607
Afu6g10940	conserved hypothetical protein	0.26132	0.615976
Afu5g08750	hypothetical protein	0.305737	0.615977
Afu1g13890	U4/U6 small nuclear ribonucleoprotein, putative	0.202894	0.616059
Afu1g04010	TBC domain protein, putative	0.116767	0.616438
Afu7g04220	conserved hypothetical protein	0.16908	0.616715
Afu1g05420	transcription factor SipA3, putative	0.164473	0.616911
Afu8g04210	triacylglycerol lipase, putative	-0.00329008	0.6171
Afu2g15210	small nuclear ribonucleoprotein (LSM2), putative	-0.0608789	0.61741
Afu2g01090	DNA helicase, putative	-0.384883	0.617552
Afu2g05480	DNA-directed RNA polymerase I 13.1 kDa polypeptide, putative	0.20555	0.617564
Afu1g02170	ATP-dependent Clp protease, putative	0.150809	0.618119
Afu1g15540	hypothetical protein	0.458203	0.618862
Afu7g01920	DNA-dependent RNA polymerase II RPB140	0.2263	0.621263
Afu6g03890	catalase A	-0.119848	0.621859
Afu3g15010	hypothetical protein	-0.0297185	0.622018
Afu3g08390	tRNA dihydrouridine synthase (Smm1), putative	0.41276	0.622132
Afu2g03450	hypothetical protein	0.344339	0.622853
Afu8g02740	hypothetical protein	0.0951655	0.62371
Afu5g03030	C6 transcription factor, putative	-0.385737	0.623736
Afu1g04650	transposase	0.38134	0.62383
Afu2g05080	hypothetical protein	0.0227652	0.623848
Afu2g01130	ubiquitin conjugating enzyme (UbcJ), putative	0.0236745	0.62487
Afu5g12280	hypothetical protein	-0.0584525	0.625607
Afu4g08590	AT DNA binding protein (Thy28), putative	0.115344	0.625866
Afu5g05960	serine/threonine protein kinase, putative	0.347603	0.626699
Afu6g02680	ankyrin repeat and BTB/POZ domain protein	0.411295	0.626958
Afu4g06040	hypothetical protein	0.277647	0.627295
Afu2g13910	EBP domain protein, putative	0.253601	0.627461
Afu3g06380	hypothetical protein	0.121136	0.630455
Afu2g02070	CCR4-NOT transcription complex, subunit 3	0.196584	0.631051
Afu5g13580	3-ketosteroid-delta-1-dehydrogenase, putative	0.537734	0.631983
Afu6g08960	proteasome component Pre9, putative	0.0177722	0.632115
Afu1g15830	hypothetical protein	0.547257	0.632237
Afu2g07670	palmitoyltransferase (SidR), putative	-0.101192	0.632316
Afu2g17060	60S ribosome subunit biogenesis protein (Nip7), putative	0.408303	0.634225
Afu2g04580	hypothetical protein	0.101588	0.635684
Afu2g00740	conserved hypothetical protein	-0.0103257	0.635711
Afu3g06810	possible transposase	0.0527224	0.635883
Afu4g09730	hypothetical peptidase 48 family protein	-0.241045	0.635931
Afu6g03650	possible transposase	-0.0555111	0.636682
Afu7g06340	hypothetical protein	0.125282	0.636737
Afu4g10750	alpha-1,6-mannosyltransferase subunit, putative	-0.262251	0.63675
Afu1g09760	UPF0171 domain protein	0.220546	0.639186
Afu2g13400	TDE domain protein, putative	-0.131121	0.640216
Afu6g03610	mariner class transposase, putative	-0.0315186	0.64053
Afu7g05620	APSES transcription factor (MbpA), putative	0.151436	0.641303
Afu1g12960	SCF ubiquitin ligase complex subunit CulA, putative	0.363974	0.642142
Afu2g11450	DUF691 domain protein	0.142953	0.64231
Afu5g06860	hypothetical protein	-0.0797752	0.642602
Afu1g11230	HMG-CoA reductase	-0.404956	0.64268
Afu5g06220	sodium/hydrogen exchanger 3	-0.294185	0.642833
Afu1g16610	Swr1p complex component (Swc5), putative	0.0616771	0.642838
Afu3g04160	Ser/Thr protein phosphatase family	-0.233112	0.643206
Afu2g13430	chitin synthase, putative	0.0988871	0.64378
Afu2g04050	hypothetical protein	-0.0754588	0.64384
Afu5g03410	exopolyphosphatase, putative	-0.0982986	0.643893
Afu2g13170	hypothetical protein	0.243275	0.645183
Afu6g10550	arrestin domain protein	0.104045	0.646105
Afu4g07190	ornithine carbamoyltransferase	0.389011	0.646494
Afu2g11430	spindle pole body component (Alp4), putative	-0.164071	0.648225
Afu7g01230	DnaJ domain protein	0.468543	0.648276
Afu8g01830	hypothetical protein	0.408419	0.648687
Afu2g14580	manganese ion homeostasis (Fr), putative	0.090665	0.649025
Afu2g03910	ATP-depentend DNA helicase, putative	-0.029558	0.649914
Afu4g01250	hypothetical protein	0.468154	0.650661
Afu6g07350	hypothetical protein	0.0484435	0.652403
Afu3g01060	hypothetical protein	0.0989437	0.652793
Afu4g10070	class I alpha-mannosidase	-0.0721076	0.65308
Afu6g07040	Autophagy protein Apg5 family	0.226905	0.653485
Afu2g13390	MFS transporter, putative	0.0630486	0.656699
Afu2g14360	GPI anchored glucanase, putative	0.229079	0.65674
Afu8g02700	repressor protein	0.10345	0.658151
Afu3g05480	cystathionine gamma-synthase, putative	-0.0362081	0.658609
Afu5g06290	MFS transporter, putative	-0.294633	0.658864
Afu1g01700	conserved serine-rich protein	-0.321275	0.659062
Afu7g03810	possible transposase	0.0388629	0.65979
Afu2g01550	maf1 protein	-0.155958	0.659863
Afu3g01030	RTA1 domain protein, putative	0.425947	0.660249
Afu2g11950	hypothetical protein	-0.192988	0.660336
Afu2g17180	sorting nexin Mvp1	0.0551386	0.66074
Afu2g11210	PHD finger and SET domain protein, putative	0.260643	0.660755
Afu3g00330	hypothetical protein	0.379038	0.662046
Afu6g08870	nicotinamide mononucleotide adenylyl transferase	0.266122	0.662076
Afu8g04000	acetyl-coa acetyltransferase	0.547588	0.662396
Afu5g02150	proteasome component Pre6, putative	0.279351	0.662603
Afu1g11670	small nuclear ribonucleoprotein (LSM8), putative	-0.152233	0.662668
Afu1g05940	conserved hypothetical protein	-0.160517	0.663924
Afu2g07690	protein kinase, putative	0.387779	0.664319
Afu1g03440	peroxisomal carrier protein, putative	-0.465718	0.66456
Afu4g07400	sensor histidine kinase/response regulator, putative	-0.0198222	0.666117
Afu5g13370	mitochondrial DNA helicase (Pif1), putative	0.382631	0.666404
Afu2g09850	oxidoreductase, 2-nitropropane dioxygenase family, putative	-0.547677	0.667598
Afu2g13020	mitochondrial dicarboxylate carrier, putative	0.0635081	0.66825
Afu2g12400	ATP synthase oligomycin sensitivity conferral protein, putative	-0.203701	0.668429
Afu1g09290	cholinephosphate cytidylyltransferase	0.201155	0.668476
Afu4g13240	conserved hypothetical protein	-0.0649015	0.66859
Afu2g08860	exosome complex endonuclease 2/ribosomal RNA processing protein, putative	-0.0503348	0.66925
Afu1g05900	DnaJ and TPR domain protein	0.492383	0.669279
Afu2g16020	t-complex protein 1, alpha subunit, putative	0.127965	0.669916
Afu6g10650	ATP citrate lyase, subunit 1, putative	-0.259711	0.670485
Afu4g07930	hypothetical protein	0.397819	0.671684
Afu3g01020	hypothetical protein	-0.26975	0.671739
Afu2g15770	conserved hypothetical protein	0.512215	0.672006
Afu6g13310	26S proteasome non-ATPase regulatory subunit 9, putative	0.0474545	0.673105
Afu2g11650	hypothetical protein	-0.0377835	0.673804
Afu3g11980	oxidoreductase, 2OG-Fe(II) oxygenase family family	-0.41546	0.674021
Afu8g01930	methyltransferase	0.347887	0.674042
Afu1g14290	small nuclear ribonucleoprotein (LSM7), putative	0.312914	0.6743
Afu2g12330	conserved hypothetical protein	-0.0285707	0.675079
Afu2g07380	Eukaryotic ribosomal protein L18	0.145708	0.675455
Afu1g07600	ribonuclease HI large subunit	0.135948	0.676601
Afu1g03910	hypothetical protein	0.572001	0.677049
Afu2g13250	bifunctional tryptophan synthase TRPB	0.48757	0.677305
Afu2g06050	conserved hypothetical protein	-0.439947	0.679497
Afu7g01390	hypothetical protein	-0.0354856	0.680762
Afu4g09840	kynureninase	0.359105	0.682274
Afu2g10460	conserved hypothetical protein	0.146429	0.683085
Afu7g03640	AP-3 complex subunit delta, putative	0.0693703	0.683346
Afu8g01010	thermophilic desulfurizing enzyme family protein	-0.0467327	0.684112
Afu2g01670	hypothetical protein	0.23982	0.684369
Afu2g05340	1,3-beta-glucanosyltransferase, putative	-0.317962	0.684845
Afu2g01910	conserved hypothetical protein	0.0635578	0.685017
Afu2g02210	hypothetical protein	0.30728	0.685159
Afu4g13550	short chain dehydrogenase/reductase family	-0.458675	0.685487
Afu8g04900	hypothetical protein	-0.0834281	0.685942
Afu7g06700	SI:bY184L24.3	0.0419856	0.687056
Afu3g12000	hypothetical protein	0.462911	0.687172
Afu1g02670	ARP2/3 complex 34 kDa subunit , putative	-0.294804	0.687237
Afu6g12680	HIT domain protein	-0.276233	0.687395
Afu1g11210	hypothetical protein	0.139927	0.687734
Afu2g05780	mRNA capping enzyme alpha subunit, putative	-0.00205821	0.688146
Afu7g00300	squalene-hopene-cyclase, putative	-0.258962	0.688371
Afu1g10900	conserved hypothetical protein	0.436662	0.68863
Afu2g01330	exosome complex subunit Rrp46, putative	0.353736	0.689373
Afu1g01630	isoflavone reductase family protein	0.263688	0.689722
Afu2g16370	Ribosomal protein L32	0.284136	0.689779
Afu2g05700	hypothetical protein	-0.362781	0.690296
Afu4g12880	hypothetical protein	-0.0419345	0.691489
Afu1g09220	SNF7 family protein	-0.182412	0.691714
Afu1g13010	SNF2 family helicase/ATPase PasG, putative	0.373572	0.69199
Afu2g17230	NACHT domain protein	0.400666	0.692272
Afu6g09940	transposase	0.0229824	0.692539
Afu5g03590	conserved hypothetical protein	0.561424	0.694054
Afu2g06080	GTPase activating protein (Gyp1), putative	0.00827131	0.694214
Afu4g06520	conserved hypothetical protein	0.358906	0.694411
Afu1g03250	oxidoreductase, short chain dehydrogenase/reductase family, putative	-0.297801	0.695055
Afu2g02810	alcohol dehydrogenase, zinc-containing, putative	0.0745998	0.696899
Afu1g09920	hypothetical protein	-0.291442	0.697131
Afu2g04450	HECT domain protein	-0.158713	0.69754
Afu5g00840	integral membrane protein	-0.405346	0.697729
Afu2g06160	mutanase	0.392177	0.698573
Afu2g03310	nucleoporin Nsp1, putative	0.245036	0.700512
Afu2g06040	actin cortical patch component, putative	-0.257907	0.70068
Afu2g12690	hypothetical protein	-0.0538472	0.701043
Afu2g03100	conserved hypothetical protein	-0.0593596	0.701378
Afu1g15840	hypothetical protein	0.124045	0.701492
Afu1g02190	Ras GTPase Rab11, putative	0.456734	0.701566
Afu2g10080	SET and MYND domain protein, putative	-0.0557768	0.701701
Afu1g14260	related to TGF beta receptor associated protein 1	-0.10997	0.701822
Afu7g04350	mandelate racemase/muconate lactonizing enzyme family protein	-0.140428	0.704057
Afu1g05590	alpha/beta hydrolase, putative	-0.0592493	0.704443
Afu2g02240	hypothetical protein	0.01623	0.704779
Afu3g11390	proteasome regulatory particle subunit Rpt3, putative	0.48291	0.705731
Afu8g02610	cytochrome P450 monooxygenase, putative	-0.126914	0.70628
Afu2g10930	Golgi membrane protein (Rer1), putative	0.380226	0.706452
Afu2g13440	chitin synthase E	-0.0799628	0.706502
Afu2g03340	DUF652 domain protein	0.35336	0.706533
Afu2g12060	F-box and WD repeat-containing protein	0.156019	0.706967
Afu4g06500	hypothetical protein	-0.199491	0.707098
Afu3g08300	DNA replication factor C subunit Rfc2, putative	0.103393	0.707137
Afu2g09160	sua5 protein	0.244146	0.707377
Afu7g05330	hypothetical protein	0.362176	0.708208
Afu2g03160	hypothetical protein	-0.363242	0.7086
Afu4g09390	conserved hypothetical protein	0.533592	0.708658
Afu1g03570	acid phosphatase PHOa	0.126041	0.710116
Afu8g01570	ADP-ribosylglycohydrolase family protein	0.276575	0.711089
Afu1g09500	ubiquitin-protein ligase (Rsp5), putative	0.496753	0.711436
Afu7g03650	conserved hypothetical protein	0.000124	0.711787
Afu2g13820	SAP domain protein, putative	0.250146	0.711959
Afu5g09350	conserved hypothetical protein	-0.125705	0.71258
Afu1g15210	conserved hypothetical protein	-0.0739901	0.712642
Afu5g09770	hypothetical protein	0.398549	0.713765
Afu1g05110	mRNA export factor mex67	0.394713	0.715222
Afu8g01970	extracellular endo-polygalacturonase, putative	0.175317	0.716375
Afu1g10760	CCAAT-box-binding transcription factor	0.207084	0.716469
Afu8g06920	K+/H+ antiporter, putative	-0.260891	0.71682
Afu6g02920	synaptobrevin	0.420326	0.719376
Afu8g04300	C2H2 finger domain protein, putative	0.280413	0.719952
Afu1g08850	septin	0.553806	0.720755
Afu7g01910	conserved hypothetical protein	-0.206314	0.722191
Afu2g04990	transposase	0.325356	0.722423
Afu2g12210	stress activated MAP kinase interacting protein, putative	0.475681	0.722689
Afu8g05530	soluble fumarate reductase (Osm1), putative	0.168795	0.722833
Afu3g05360	histone H2A	-0.218187	0.723761
Afu4g08660	oligosaccharyltransferase subunit ribophorin II, putative	-0.403137	0.724587
Afu1g15040	hypothetical protein	-0.172386	0.724658
Afu4g06690	ribonucleotide reductase large subunit (Rnr1), putative	0.199836	0.7248
Afu4g09830	indoleamine 2,3-dioxygenase pyrrole 2,3-dioxygenase)	0.4983	0.725899
Afu3g11480	mitochondrial methylglutaconyl-CoA hydratase (Auh), putative	-0.1658	0.726159
Afu5g13900	transposase	0.176439	0.726544
Afu2g04310	argininosuccinate synthase	0.123054	0.726731
Afu1g00810	Asp f7-like allergen, putative	0.415285	0.727406
Afu4g13680	phosphatidylserine synthase	-0.0790809	0.728076
Afu3g08340	hypothetical protein	-0.0659304	0.72844
Afu2g10500	ribosomal protein S9	0.274348	0.728941
Afu1g16840	TCTP domain protein	0.164249	0.729248
Afu8g05160	peroxisomal membrane protein (Pex13), putative	0.548527	0.733142
Afu1g14760	possible transposase	-0.0729144	0.733714
Afu1g12220	hypothetical protein	0.571525	0.733805
Afu8g03910	hypothetical protein	0.0358567	0.734101
Afu5g07300	electron transfer flavoprotein, beta subunit [imported]	-0.0539854	0.734122
Afu1g05430	hypothetical protein	0.26746	0.734795
Afu1g09770	La domain family	0.364286	0.735464
Afu3g14730	LysR family regulatory protein, putative	-0.166913	0.737209
Afu6g12330	WD domain protein	0.378289	0.737629
Afu1g01940	hypothetical protein	-0.17376	0.737733
Afu3g06770	zinc knuckle domain protein	-0.00252657	0.738169
Afu6g02880	possible transposase	-0.0452717	0.738173
Afu2g14880	transcription initiation factor TFIID subunit 7, putative	0.326338	0.738836
Afu5g08860	hypothetical protein	0.308945	0.739317
Afu2g08190	hypothetical protein	-0.254851	0.739511
Afu2g01860	integral membrane protein	-0.0144071	0.740303
Afu7g01360	transposase	0.273549	0.74057
Afu2g04870	dehydrogenase complex alpha subunit, putative	0.370667	0.740806
Afu1g02910	hypothetical protein	0.330613	0.741016
Afu1g08780	transposase	0.268355	0.741312
Afu2g12030	histone acetyltransferase type b catalytic subunit, putative	0.0376465	0.741579
Afu3g10430	transposase	0.168198	0.742492
Afu2g16340	hypothetical protein	0.124897	0.74314
Afu5g06180	possible transposase	-0.0580688	0.744285
Afu1g02640	conserved hypothetical protein	0.0203817	0.7452
Afu5g13530	3'-5' exoribonuclease (Csl4), putative	0.0710869	0.745594
Afu3g06870	MYB DNA-binding domain protein	0.123594	0.745759
Afu2g11660	Rad4 family protein	-0.0636927	0.746067
Afu6g10480	peptidyl-prolyl cis-trans isomerase, putative	-0.0111426	0.748553
Afu4g12210	DNA replication helicase (Dna2), putative	0.161983	0.749173
Afu2g10620	serine/threonine protein kinase (YPK1), putative	0.355929	0.750871
Afu8g02090	nucleotide-sugar transporter family protein	0.219372	0.751365
Afu3g08610	DUF124 domain protein	-0.0901069	0.751867
Afu2g04940	KH domain protein	0.338489	0.752142
Afu4g06160	branched-chain amino acid aminotransferase, cytosolic	0.0123461	0.753636
Afu2g12610	ferrodoxin-NADP(+) reductase	0.0869198	0.753765
Afu1g04580	nitrogen permease regulator homolog	-0.256331	0.754284
Afu5g02540	conserved hypothetical protein	0.219759	0.755107
Afu2g16660	tRNA nucleotidyltransferase	0.360685	0.756965
Afu6g05160	C2H2 transcription factor (Azf1), putative	-0.268241	0.757045
Afu1g02870	extensin-like protein, putative	0.579729	0.757812
Afu6g07170	conserved hypothetical protein	-0.000478	0.757925
Afu1g06310	SWI-SNF complex subunit (BAF60b), putative	0.0846705	0.760128
Afu6g11060	DnaJ domain protein	0.489873	0.760711
Afu1g02890	dUTPase (Dut), putaive	0.142002	0.761399
Afu2g03380	alkaline serine protease	0.0725764	0.761832
Afu4g00780	Fot5 transposase, putative	-0.131461	0.762149
Afu3g06540	3'-phosphoadenosine-5'-phosphosulfate reductase	0.428072	0.762342
Afu7g03720	serine/threonine protein kinase (Kin28), putative	0.126897	0.762552
Afu8g00560	cytochrome P450, putative	-0.291692	0.762889
Afu3g13920	APSES transcription factor, putative	0.470587	0.762914
Afu3g02870	NUDIX domain, putative	0.364228	0.763025
Afu2g11240	UDP-N-acetylglucosamine-dolichyl-phosphate N-acetylglucosaminephosphate transferase, putative	0.0948296	0.764109
Afu1g05160	DNA-directed RNA polymerase I, II, and III subunit Rpb6	0.130666	0.764502
Afu6g09010	U1 snRNP splicing complex subunit (Luc7), putative	-0.189113	0.765558
Afu8g05820	DNA mismatch repair protein, putative	-0.178856	0.766429
Afu2g07620	cystathionine beta-synthase, putative	0.17577	0.767407
Afu1g09730	PAP2 domain protein	0.303187	0.768668
Afu5g12350	ribonucleotide reductase	-0.018755	0.769155
Afu1g15180	conserved hypothetical protein	0.17641	0.769847
Afu2g02470	PA domain protein	-0.0766531	0.770167
Afu4g00750	hypothetical protein	-0.0412077	0.77079
Afu4g10950	3-ketoacyl-coA thiolase peroxisomal A precursor	0.0796151	0.771274
Afu3g09050	exonuclease I, putative	0.0600469	0.771536
Afu1g07430	hypothetical protein	0.34677	0.772679
Afu2g02510	meiotic regulator-interacting protein, putative	0.204025	0.772749
Afu1g03750	hypothetical protein	-0.0256356	0.773836
Afu3g05430	ATP dependent RNA helicase (Dhh1), putative	0.463604	0.773891
Afu3g01980	C6 transcription factor, putative	0.292589	0.774667
Afu2g12860	DUF726 domain protein	0.124404	0.775082
Afu2g08510	SET domain protein	0.0892623	0.775609
Afu2g02580	HAD superfamily hydrolase, putative	0.0765269	0.777426
Afu3g06930	hypothetical protein	-0.428523	0.778788
Afu8g03980	DUF59 domain protein	0.330671	0.779217
Afu7g02620	DNA-directed RNA polymerases N/8 kDa subunit superfamily	0.070774	0.779255
Afu2g05640	hypothetical protein	-0.131016	0.780257
Afu2g02960	translation factor pelota, putative	0.344523	0.780647
Afu2g13860	histone H4	-0.2066	0.781114
Afu5g13050	kinesin family protein	0.213034	0.782069
Afu1g09690	tRNA ligase	0.575782	0.782276
Afu1g07470	autophagic death protein IDI-7, putative	0.457529	0.783194
Afu2g05470	sister chromatid cohesion protein Mis4, putative	-0.0344335	0.785426
Afu4g10430	mitochondrial peptidyl-tRNA hydrolase Pth2, putative	-0.475237	0.785721
Afu2g17630	hypothetical protein	-0.131032	0.786544
Afu3g12970	DUF580 domain protein	0.298301	0.787372
Afu3g14140	metacaspase CasB	-0.12736	0.788848
Afu3g06000	conserved hypothetical protein	0.506651	0.78915
Afu1g06720	histone acetyltransferase Spt10, putative	0.21324	0.790387
Afu6g06500	actin-related protein 2/3 complex subunit 1A, putative	-0.0593631	0.790479
Afu2g01790	conserved serine proline-rich protein	0.544123	0.791099
Afu5g02810	mariner class transposase, putative	0.0250248	0.791932
Afu2g10320	SH3 domain protein	0.176758	0.791973
Afu6g10920	mariner class transposase, putative	-0.188265	0.792977
Afu4g10500	conserved hypothetical protein	0.0798994	0.79305
Afu2g08420	prenyl cysteine carboxyl methyltransferase Ste14	0.281568	0.793065
Afu2g10900	autophagy related lipase (Atg15), putative	0.242025	0.794282
Afu2g02350	MYB DNA-binding domain protein	-0.0887196	0.794353
Afu1g02100	hypothetical protein	0.524899	0.794816
Afu5g02980	mariner class transposase, putative	0.245059	0.795406
Afu2g02870	hypothetical protein	0.0218019	0.795419
Afu2g01820	pre-mRNA splicing factor (Prp24), putative	0.113982	0.796497
Afu2g03140	peptide methionine sulfoxide reductase	-0.0814518	0.797762
Afu3g15230	general amidase, putative	-0.245176	0.798175
Afu1g05030	possible transposase	-0.12714	0.798403
Afu6g12180	conserved hypothetical protein	0.286978	0.7988
Afu5g01870	DNA replication factor C subunit Rfc3, putative	0.39509	0.799547
Afu5g08680	mitochondrial GTPase (YlqF), putative	-0.0136551	0.79955
Afu2g00360	homeobox and C2H2 transcription factor, putative	0.0512221	0.800461
Afu1g14110	RNA polymerase subunit	0.527776	0.800596
Afu2g04230	fumarylacetoacetate hydrolase FahA	0.277245	0.801257
Afu2g05110	small nuclear ribonucleoprotein SmD1, putative	-0.406195	0.802904
Afu2g10140	DNA replication licensing factor Mcm7, putative	0.361645	0.804215
Afu1g01420	F-box domain protein	-0.258284	0.805281
Afu2g10190	hypothetical protein	0.0135152	0.806403
Afu3g09100	hypothetical protein	0.343764	0.806796
Afu4g07080	dual specificity phosphatase, putative	0.0723189	0.808497
Afu2g04650	PAB-dependent poly(A)-specific ribonuclease subunit (Pan2), putative	-0.354396	0.809481
Afu6g14370	conserved hypothetical protein	-0.12025	0.809517
Afu2g04920	conserved hypothetical protein	-0.0677138	0.810393
Afu7g06740	endoglucanase, putative	-0.145977	0.810551
Afu2g10640	SAGA complex subunit (Ada2), putative	0.133248	0.811377
Afu2g03090	vacuolar ABC heavy metal transporter (Hmt1), putative	0.400122	0.811955
Afu4g07550	G-patch domain protein (Spp2), putative	0.42072	0.814056
Afu5g11850	mitochondrial carrier protein (Pet8), putative	-0.152362	0.814089
Afu6g06620	YIP3-like protein	0.540866	0.815136
Afu4g13600	C2H2 finger domain protein, putative	0.20961	0.815935
Afu2g06110	chromatin remodeling and histone acetyltransferase complexes subunit (Arp4) putative	0.110665	0.816976
Afu3g07220	conserved hypothetical protein	-0.278452	0.817459
Afu6g11130	possible replication factor-a protein	0.187406	0.817829
Afu3g06280	Rho GTPase activator (Rgd1), putative	0.245434	0.817978
Afu2g15590	sulfite reductase [NADPH], putative	0.330171	0.819779
Afu2g11720	CobW domain protein	0.0933326	0.819782
Afu2g03970	DUF52 domain protein	0.157543	0.820605
Afu8g05960	integral membrane protein	-0.280887	0.8211
Afu2g03320	hypothetical protein	0.16156	0.823949
Afu6g06630	hypothetical protein	0.24701	0.826161
Afu6g02250	hypothetical protein	0.076707	0.826837
Afu5g00920	transesterase (LovD), putative	0.332953	0.827622
Afu6g13900	conserved hypothetical protein	0.187494	0.828007
Afu2g00990	glycerophosphoryl diester phosphodiesterase family protein	0.170537	0.829858
Afu8g05300	RNA polymerase II subunit 7	0.389894	0.830019
Afu2g10490	hypothetical protein	0.143531	0.830146
Afu6g04810	RNA polymerase II transcription mediator complex subunit (Med6), putative	0.249435	0.830618
Afu2g17130	protein kinase regulator Ste50	0.442385	0.830635
Afu2g10430	hypothetical protein	-0.0867868	0.833565
Afu2g04740	vacuolar sorting-associated protein (Vps27), putative	0.350118	0.834723
Afu6g05040	DNA replication factor C subunit Rfc4, putative	-0.0337323	0.835777
Afu6g07750	MFS phospholipid transporter (Git1), putative	0.132365	0.83705
Afu2g00980	conserved hypothetical protein	-0.0736175	0.843978
Afu2g06260	hypothetical protein	0.175885	0.844254
Afu1g03670	hypothetical protein	0.339762	0.844762
Afu4g06080	MFS myo-inositol transporter, putative	-0.483326	0.845107
Afu2g04430	DUF21 and CBS domain protein (Mam3), putative	-0.470946	0.84538
Afu8g02490	hypothetical protein	0.0814756	0.84567
Afu1g05300	capsular associated protein, putative	-0.050358	0.845671
Afu2g01640	tryptophanyl-tRNA synthetase	0.195703	0.846476
Afu2g05970	PHD finger and JmjC domain protein, putative	-0.0569015	0.847087
Afu7g04200	conserved hypothetical protein	0.132204	0.848061
Afu2g15820	SNARE domain protein	0.0981793	0.849159
Afu4g12680	DNA repair protein Rad50	0.511904	0.849799
Afu6g00100	FOT5 transposase, putative	0.336586	0.85007
Afu2g16070	urease accessory protein UreD	0.362374	0.850425
Afu4g10630	conserved hypothetical protein	-0.0184843	0.85136
Afu4g07200	conserved hypothetical protein	0.0558851	0.852184
Afu3g07240	multidomain presynaptic cytomatrix related protein	0.270297	0.852731
Afu5g08340	transposase	0.238542	0.852856
Afu4g11150	disintegrin-like metalloprotease, putative	0.533739	0.853056
Afu2g14940	hypothetical protein	0.284378	0.854106
Afu2g12390	protein kinase regulator (Mob1), putative	0.126612	0.855171
Afu2g06060	transcriptional co-activator (Hfi1/Ada1), putative	0.136121	0.855811
Afu4g11240	alpha-aminoadipate reductase large subunit, putative	0.208431	0.855835
Afu3g06010	Nucleolar essential protein 1, putative	0.390033	0.856349
Afu2g09000	conserved hypothetical protein	0.249978	0.856845
Afu7g01280	campothecin resistance conferring protein rcaA	0.104998	0.85698
Afu2g00960	NACHT and Ankyrin domain protein	-0.0756461	0.857147
Afu6g10560	iga protein, putative	0.232843	0.857731
Afu2g01150	conserved hypothetical protein	0.0684081	0.858284
Afu7g03750	serine/threonine protein kinase, putative	-0.0519833	0.858722
Afu4g01270	hypothetical protein	0.298642	0.860266
Afu6g06390	hypothetical protein	0.237799	0.861369
Afu4g11930	Formamidopyrimidine-DNA glycosylase, putative	0.474115	0.861851
Afu4g11940	conserved hypothetical protein	0.0916702	0.864538
Afu2g02550	Phosducin domain containing protein	0.0052034	0.864574
Afu4g05850	malonyl CoA-acyl carrier protein transacylase	0.401982	0.864727
Afu5g11240	oxidoreductase, short chain dehydrogenase/reductase family	0.481831	0.865219
Afu5g01980	histone deacetylase hda1	0.501495	0.865593
Afu2g10690	MFS phosphate transporter, putative	0.556267	0.866193
Afu5g02350	hydrolase, carbon-nitrogen family, putative	0.295494	0.866768
Afu2g03640	Ras GTPase activating protein, putative	-0.219418	0.868294
Afu4g10790	phosphoribosyl diphosphate synthase isoform 4	0.536631	0.868819
Afu2g08440	ubiquitin C-terminal hydrolase, putative	0.0599852	0.869389
Afu7g06100	acyl-coenzyme A oxidase I, peroxisomal, component A	0.445907	0.870264
Afu2g02560	Coatomer subunit gamma, putative	-0.0240381	0.872464
Afu2g16690	SNF7 family protein	0.263478	0.87294
Afu2g15110	C2H2 finger domain protein, putative	0.416683	0.874758
Afu2g02680	matrix AAA protease MAP-1	-0.251132	0.875184
Afu1g08770	C6 finger domain protein, putative	0.367779	0.875276
Afu5g09290	NAD-dependent 15-hydroxyprostaglandin dehydrogenase	-0.546525	0.875381
Afu6g10870	transposase	0.170696	0.875724
Afu2g05650	cytoplasmic asparaginyl-tRNA synthetase, putative	0.521243	0.875828
Afu2g11730	Protein kinase domain-containing protein	0.335098	0.876523
Afu8g02060	glycan biosynthesis protein (PigL), putative	0.0509868	0.876699
Afu5g04120	SIR2 family histone deacetylase, putative	0.128339	0.877714
Afu2g04890	methyltransferase	0.0884991	0.878536
Afu8g04440	COP9 signalosome subunit 8 (CsnH), putative	-0.0992769	0.878989
Afu1g10880	P-type calcium ATPase, putative	0.467572	0.880143
Afu2g01900	Rtf1p, putative	0.430987	0.880346
Afu3g09980	hypothetical protein	0.124862	0.880868
Afu5g09020	WSC domain protein, putative	0.537267	0.881831
Afu2g14540	endoglucanase, putative	-0.557627	0.882081
Afu1g05480	transposase	0.26054	0.884168
Afu6g06490	U1 small nuclear ribonucleoprotein A, putative	-0.127754	0.885998
Afu7g00280	conserved hypothetical protein	0.199334	0.886984
Afu2g08620	20S cyclosome subunit (BimA/Nuc2/Cdc27), putative	0.334281	0.88937
Afu6g03100	hypothetical protein	0.432473	0.88982
Afu8g06830	endoglucanase, putative	-0.246662	0.890119
Afu6g05350	aspartic-type endopeptidase (OpsB), putative	0.413382	0.891215
Afu2g04090	hypothetical protein	0.236884	0.89122
Afu2g12250	DNA replication factor C subunit Rfc5, putative	0.164787	0.891622
Afu7g05990	5-formyltetrahydrofolate cyclo-ligase, putative	-0.20192	0.892486
Afu7g06880	hypothetical protein	0.176023	0.892526
Afu7g02020	hypothetical protein	-0.0858916	0.892781
Afu6g02060	tRNA-splicing endonuclease, putative	0.244878	0.892843
Afu4g09210	phosphate transporter	-0.0872796	0.893339
Afu2g08000	conserved hypothetical protein	0.21147	0.893539
Afu2g08130	ribosomal protein L41	-0.125866	0.896367
Afu6g09120	hypothetical protein	0.200725	0.896461
Afu1g12070	glycine cleavage system H protein	-0.174614	0.89671
Afu1g06540	C6 transcription factor, putative	0.166611	0.89834
Afu4g07970	DNA polymerase delta subunit 2, putative	-0.0317653	0.900299
Afu5g06310	conserved hypothetical protein	0.28705	0.900908
Afu2g15780	Ca2+ dependent mitochondrial carrier protein, putative	0.124428	0.901114
Afu2g02380	hypothetical protein	0.196288	0.901383
Afu3g03320	MFS monocarboxylate transporter, putative	0.322049	0.9041
Afu5g00930	amino acid permease, putative	0.400572	0.904336
Afu1g09950	casein kinase II beta subunit CKB2	0.468111	0.904743
Afu1g09720	hypothetical protein	-0.1591	0.905469
Afu7g03830	related to nucleotide exsicion repair protein RAD7	0.292623	0.905794
Afu4g07510	proteasome component Pre1, putative	0.287177	0.906394
Afu2g08150	NEDD8-like protein (RubA), putative	-0.00712224	0.906958
Afu5g00700	hypothetical protein	-0.153074	0.907161
Afu4g00270	Fot5 transposase, putative	0.37459	0.907751
Afu1g05410	Krr1 family protein	0.427068	0.907923
Afu2g07400	mitochondrial carrier protein, putative	0.338325	0.908012
Afu7g04210	tropomyosin 1	0.0621743	0.912294
Afu5g02880	C6 transcription factor, putative	0.436866	0.912367
Afu2g00880	conserved hypothetical protein	0.510716	0.914283
Afu8g06200	conserved hypothetical protein	-0.0745007	0.915443
Afu5g13760	hypothetical protein	-0.382471	0.91594
Afu3g13800	hypothetical protein	-0.179434	0.916138
Afu2g07970	ribosomal protein L19	0.231346	0.917657
Afu8g02070	glycosyl transferase, putative	0.037192	0.91926
Afu2g10250	hypothetical protein	0.207001	0.921208
Afu5g08590	endo-1,4-beta-xylanase, putative	0.414818	0.921385
Afu2g14920	protein kinase, putative	0.246062	0.922161
Afu3g03600	carboxyl esterase A	0.568478	0.92231
Afu3g14450	hypothetical protein	-0.327045	0.923316
Afu2g10920	enoyl-CoA hydratase/isomerase family protein	-0.179104	0.924431
Afu5g00860	hypothetical protein	-0.136262	0.925585
Afu5g03270	hypothetical protein	-0.201517	0.925679
Afu1g17460	C6 transcription factor, putative	0.465897	0.928315
Afu4g12110	TPR domain protein	0.568427	0.929848
Afu4g06970	RADC	0.14304	0.930732
Afu2g10110	hypothetical protein	0.0192575	0.931978
Afu5g13920	p21 protein	0.360228	0.933254
Afu4g05960	flavoprotein, putative	-0.0237321	0.933641
Afu2g13270	alcohol dehydrogenase, putative	0.314617	0.933929
Afu2g01480	conserved hypothetical protein	0.354803	0.934195
Afu1g06610	NADH-quinone oxidoreductase, 23 kDa subunit, putative	0.0981317	0.935547
Afu4g10050	calmodulin	0.548137	0.937024
Afu5g02520	DNA replication licensing factor Mcm5, putative	0.45797	0.939041
Afu2g10030	vip1 protein	0.313958	0.940039
Afu3g08040	polymerase (RNA) II (DNA directed) polypeptide D	0.00512063	0.940245
Afu2g12520	hypothetical protein	-0.157676	0.940511
Afu2g07840	competence/damage-inducible protein CinA, putative	0.183316	0.940863
Afu2g16980	hypothetical protein	0.17153	0.942935
Afu5g14270	phenylacetyl-CoA ligase	-0.11579	0.943054
Afu2g05960	hypothetical protein	-0.127293	0.945939
Afu3g07910	UDP-glucose 4-epimerase, putative	0.327196	0.947229
Afu3g14010	DNA replication licensing factor Mcm2, putative	0.537359	0.947514
Afu2g06220	zinc knuckle domain protein	0.389924	0.947844
Afu8g06550	carbonic anhydrase family protein	0.201815	0.947927
Afu2g03650	mKIAA0171 protein	-0.16972	0.948084
Afu1g15880	DUF803 domain membrane protein	0.348897	0.948437
Afu2g02610	SNARE complex subunit (Vam7), putative	0.482758	0.949064
Afu4g00380	hypothetical protein	-0.252828	0.949138
Afu2g04440	C2H2 finger domain protein, putative	0.45302	0.94957
Afu2g04110	ENTH domain protein	0.276283	0.951566
Afu3g02360	FAD dependent oxidoreductase superfamily	0.0644148	0.952244
Afu2g08140	hypothetical protein	0.0929876	0.953484
Afu5g12370	WD repeat protein	0.160102	0.9565
Afu4g12700	hypothetical protein	-0.483938	0.957953
Afu3g05380	hypothetical protein	0.30205	0.959167
Afu2g01210	ATP dependent RNA helicase (Dbp5), putative	0.568266	0.961702
Afu1g04110	C2H2 transcription factor, putative	0.261323	0.963533
Afu5g13860	mlo3 protein	0.394904	0.968703
Afu2g03370	conserved hypothetical protein	-0.424383	0.969375
Afu4g00430	isoamyl alcohol oxidase, putative	0.251053	0.969566
Afu2g14090	extragenic suppressor of the bimD6 mutation	0.210726	0.969576
Afu2g12130	conserved hypothetical protein	-0.0724726	0.970028
Afu2g13090	RNA polymerase II subunit 3	-0.0842901	0.970065
Afu5g13790	C6 transcription factor (Acr-2), putative	-0.00130172	0.97018
Afu2g11680	HD family hydrolase, putative	-0.106601	0.970823
Afu7g03700	diacylglycerol acyltransferase type 2A	0.00239356	0.973091
Afu2g07660	conserved hypothetical protein	0.231478	0.975548
Afu3g09140	endo 1,5-alpha-arabinase	0.041235	0.976736
Afu7g03680	SacI domain protein	0.142649	0.977306
Afu1g04710	PP-loop ATPase superfamily protein, putative	0.415622	0.978394
Afu4g10490	related to protein transport protein SEC6	-0.100237	0.979858
Afu7g05270	Dpy-30 motif family	0.0821359	0.980071
Afu2g16880	ribosomal protein L37a	0.236995	0.980829
Afu2g06020	mitochondrial respiratory complex I chaperone (Cia84), putative	-0.251779	0.981207
Afu2g02690	fungal specific transcription factor, putative	0.432909	0.982311
Afu1g07090	conserved hypothetical protein	0.562276	0.983187
Afu5g01950	histone H2A	0.114315	0.985741
Afu2g03680	SH3 domain protein	0.468989	0.986201
Afu2g08790	zinc carboxypeptidase, putative	-0.15867	0.989121
Afu1g07030	conserved hypothetical protein	-0.280997	0.989372
Afu6g05290	exocyst complex component Sec15, putative	0.17393	0.989379
Afu2g10730	DNA polymerase alpha catalytic subunit, putative	0.383735	0.994719
Afu4g09020	DEAD/DEAH box helicase, putative	0.258289	0.995634
Afu2g12940	conserved hypothetical protein	0.248006	0.995828
Afu2g12450	hydroxymethylglutaryl-CoA lyase	0.00774881	0.997674
Afu2g04470	hypothetical protein	0.495516	1.00133
Afu4g14640	low affinity iron transporter, putative	0.181957	1.00137
Afu2g05570	hypothetical protein	0.299676	1.00192
Afu2g03920	G1/S-specific cyclin, putative	0.460825	1.00251
Afu2g03710	cell polarity protein, putative	0.499767	1.00266
Afu1g09320	DUF1253 domain protein	0.202	1.00389
Afu2g13630	amino transferase	0.310756	1.00405
Afu3g01080	hypothetical protein	0.329641	1.00418
Afu2g12140	voltage-gated chloride channel, putative	-0.199326	1.00619
Afu7g01650	related to ARCA protein, putative	0.0962015	1.00791
Afu3g12540	mariner class transposase, putative	0.111208	1.00811
Afu6g06590	DnaJ chaperone (Caj1), putative	0.33566	1.01044
Afu1g11850	hypothetical protein	0.491745	1.01053
Afu2g10350	ER membrane DUF1077 domain protein, putative	-0.377308	1.0122
Afu2g01040	formaldehyde dehydrogenase	-0.0461505	1.01342
Afu6g04950	mitochondrial GTPase (Mss1), putative	0.444127	1.01535
Afu2g13970	conserved hypothetical protein	-0.0427607	1.01554
Afu2g12430	hypothetical protein	0.209234	1.01699
Afu1g11880	acetoacetyl-CoA synthase	0.154908	1.02046
Afu6g09610	nonribosomal peptide synthase, putative	0.0260687	1.02179
Afu3g03370	cell surface protein, putative	0.328576	1.02186
Afu5g09740	C6 transcription factor, putative	-0.0658873	1.02646
Afu2g10810	brefeldin A resistance protein, putative	0.133283	1.02652
Afu2g17610	sulfatase domain protein	-0.458855	1.02864
Afu2g12870	vesicular-fusion protein sec17	-0.151561	1.02939
Afu2g14930	alanine racemase	-0.0293179	1.02971
Afu3g13470	sulfate transporter, putative	0.130678	1.03019
Afu2g03690	hypothetical protein	0.186188	1.03141
Afu2g02670	DUF1295 domain protein	0.414485	1.03337
Afu3g08130	hypothetical protein	-0.15103	1.03676
Afu2g10850	C6 finger domain protein, putative	0.357294	1.03743
Afu2g01920	glutaminyl-tRNA synthetase	0.544508	1.03843
Afu2g09060	DNA replication licensing factor Mcm4, putative	0.292986	1.03982
Afu2g04880	DUF77 domain protein	0.0105136	1.04134
Afu5g08960	triglyceride lipase-cholesterol esterase, putative	-0.527059	1.04201
Afu2g16710	hypothetical protein	0.480295	1.04375
Afu5g01680	MFS transporter, putative	-0.1699	1.0458
Afu5g01500	homocysteine S-methyltransferase, putative	-0.273045	1.04607
Afu2g15680	transcription initiation factor iia small chain	-0.03447	1.0485
Afu6g03160	NACHT domain protein	0.20877	1.05191
Afu3g04010	MFS transporter, putative	0.0384401	1.05487
Afu5g10510	ABC transporter, putative	0.0583561	1.05621
Afu1g04300	hypothetical protein	0.453704	1.05773
Afu2g05610	rna binding protein with Puf domains	0.137461	1.0615
Afu5g08740	DHHC zinc finger membrane protein	-0.0240816	1.06206
Afu1g15290	hypothetical protein	0.471334	1.06215
Afu2g09760	conserved hypothetical protein	-0.268946	1.06459
Afu2g01170	1,3-beta-glucanosyltransferase Gel1	0.368131	1.06585
Afu1g03360	hypothetical protein	-0.140242	1.06689
Afu3g13610	oxidoreductase, zinc-binding, putative	-0.399987	1.06782
Afu7g00320	extracelular proline-glycine rich protein	0.0722342	1.06803
Afu2g06250	APG12 activating enzyme ApgG, putative	0.377093	1.07011
Afu1g05530	MW0219	0.240342	1.07072
Afu1g16350	hypothetical protein	0.482927	1.07072
Afu2g04220	homogentisate 1,2-dioxygenase (HmgA), putative	0.236757	1.07106
Afu2g03440	F-box domain protein	0.356391	1.07328
Afu2g12590	Lectin C-type domain protein	-0.112496	1.0742
Afu2g02010	transmembrane protein UsgS	0.0520987	1.07775
Afu6g12900	mitochondrial carrier protein, putative	0.336671	1.08013
Afu2g15790	C-type cyclin (Ume3), putative	0.00161384	1.08055
Afu1g10300	hypothetical protein	0.305088	1.08306
Afu8g04180	C2H2 zinc finger protein	0.0667173	1.0844
Afu2g05430	Uridine kinase	0.120821	1.08541
Afu1g09960	conserved hypothetical protein	-0.37578	1.08576
Afu2g08070	CorA family metal ion transporter, putative	0.182783	1.08607
Afu3g07900	conserved hypothetical protein	-0.244945	1.08909
Afu3g01260	acetyltransferase, GNAT family family	0.0624813	1.09216
Afu4g07960	hypothetical protein	0.388503	1.09342
Afu7g07170	reverse transcriptase/protease/endonuclease Pol, putative	-0.117319	1.094
Afu2g06170	autophagy protein Atg22, putative	0.100734	1.09615
Afu2g15050	Rho GTPase activator (Lrg11), putative	0.030806	1.09642
Afu2g05740	Rho GTPase ModA, putative	0.137126	1.0978
Afu2g01060	Rho GTPase activator (Sac7), putative	0.429616	1.09842
Afu6g12920	C2H2 finger domain protein, putative	0.39384	1.10078
Afu5g02430	ATP dependent DNA ligase domain protein	0.164773	1.10293
Afu5g06970	hypothetical protein	0.235063	1.10404
Afu2g04910	proteasome component Pup1, putative	0.282447	1.10839
Afu1g03530	glucose transporter, putative	0.0452736	1.10939
Afu3g10770	RTA1 domain protein, putative	0.528613	1.11608
Afu2g07540	TOR signalling pathway protein TipA, putative	0.157175	1.11674
Afu1g03920	DNA replication licensing factor Mcm3, putative	0.388577	1.11717
Afu1g12660	hypothetical protein	0.209615	1.1174
Afu2g02820	Yippee zinc-binding protein, putative	0.29654	1.1174
Afu2g06190	DNA polymerase epsilon subunit B, putative	0.369785	1.11929
Afu2g04130	40s ribosomal protein s11	0.0198313	1.11983
Afu2g03030	pre-mRNA splicing factor (PRP8), putative	0.24106	1.12088
Afu4g09600	GPI anchored protein, putative	0.204926	1.12234
Afu5g00420	MFS transporter, putative	0.0450214	1.12317
Afu2g10820	DEAD/DEAH box helicase, putative	0.426748	1.12407
Afu2g10600	NADH-ubiquinone oxidoreductase 299 kDa subunit, putative	-0.0876458	1.12613
Afu6g13160	serine/threonine protein kinase, putative	0.489294	1.12751
Afu2g07450	PX domain protein	-0.414169	1.12758
Afu2g04950	hypothetical protein	0.0793197	1.12821
Afu2g06140	uracil DNA N-glycosylase, putative	0.213422	1.1288
Afu1g14720	Kelch motif domain protein	0.190027	1.12887
Afu2g05190	monosaccharide transporter	0.085653	1.13005
Afu2g15080	synbindin	0.219821	1.13192
Afu2g01880	Low molecular weight phosphotyrosine protein phosphatase family	0.529998	1.13264
Afu2g10210	hypothetical protein	0.000108	1.13732
Afu2g16530	cyanate hydratase, putative	0.0296135	1.13753
Afu2g03040	ribosomal protein L34 protein, putative	0.0898261	1.13848
Afu2g10420	branched-chain amino acid aminotransferase, cytosolic	0.367829	1.13957
Afu8g02690	alphaN-acetylglucosamine transferase	-0.270906	1.14111
Afu2g12220	DNA replication factor C subunit Rfc1, putative	0.392195	1.14353
Afu7g04570	Na/K ATPase alpha 1 subunit, putative	-0.393461	1.14409
Afu1g05370	conserved hypothetical protein	0.353359	1.14419
Afu1g15120	dsDNA-dependent ATPase (Rad54b), putative	0.43582	1.14613
Afu2g05020	DopAp	-0.121848	1.14799
Afu2g05630	hypothetical protein	0.200718	1.14906
Afu2g06180	hypothetical protein	0.0437406	1.14987
Afu2g02160	hypothetical protein	0.120164	1.15133
Afu3g07030	glutaminase A	0.222693	1.15196
Afu5g09870	hypothetical protein	0.174628	1.15286
Afu6g08990	hypothetical protein	0.0442013	1.15422
Afu1g15940	Auxin Efflux Carrier superfamily	0.541493	1.1575
Afu3g09360	vacuolar sorting ATPase Vps4, putative	0.175896	1.15839
Afu7g06300	hypothetical protein	0.1287	1.16195
Afu7g05280	conserved hypothetical protein	0.375689	1.16281
Afu1g02270	ars binding protein 2	0.299911	1.16978
Afu4g08380	hypothetical protein	0.231419	1.17029
Afu3g10600	clathrin-coated vesicle protein, putative	0.239917	1.17108
Afu3g03090	transposase	0.278571	1.17128
Afu1g12820	gamma-tubulin complex component GCP6, putative	-0.105216	1.17352
Afu5g06070	ABC multidrug transporter Mdr1	0.228008	1.17435
Afu2g02280	hypothetical protein	-0.106801	1.17516
Afu6g12450	chaperone/heat shock protein Hsp12, putative	0.090741	1.17644
Afu7g06000	hypothetical protein	-0.0865947	1.1779
Afu2g11440	proteasome component Pup2, putative	0.0803015	1.18024
Afu2g07570	glutamate 5-kinase, putative	-0.216197	1.18123
Afu7g00460	conserved hypothetical protein	-0.162471	1.19204
Afu1g05180	N-acetyltransferase (Nat5), putative	0.058601	1.19391
Afu1g14010	AP-2 adaptor complex subunit sigma, putative	-0.17392	1.19428
Afu4g12400	PHD finger domain protein, putative	-0.0207363	1.19615
Afu1g02300	hypothetical protein	-0.20746	1.2015
Afu3g01460	salicylate hydroxylase, putative	0.274892	1.20185
Afu7g02580	transposase	0.238906	1.20251
Afu2g14200	protein kinase, putative	-0.0849277	1.20539
Afu6g03570	beta-glucosidase 3	-0.0393237	1.20722
Afu3g10220	acid phosphatase, putative	0.375093	1.20754
Afu5g10250	hypothetical protein	-0.242981	1.20817
Afu4g13010	conserved hypothetical protein	0.241537	1.20825
Afu1g09590	conserved hypothetical protein	0.171262	1.20865
Afu3g01850	porphyromonas-type peptidyl-arginine deiminase superfamily	-0.0177499	1.20909
Afu2g07550	serine/threonine protein kinase (Ark1), putative	0.187208	1.21233
Afu1g04900	proliferating cell nuclear antigen (pcna)	0.401197	1.21617
Afu6g04760	UPF0220 domain protein	0.0566625	1.21917
Afu2g07730	nuclear migration protein, putative	0.274956	1.21918
Afu2g08660	conserved hypothetical protein	0.517037	1.21945
Afu2g15510	conserved hypothetical protein	-0.313663	1.22104
Afu3g12870	GTPase activating protein (Gyp3), putative	0.250172	1.22154
Afu2g07390	hypothetical protein	0.314743	1.22512
Afu2g06240	deoxycytidylate deaminase, putative	0.102901	1.22717
Afu2g07430	DDHD domain protein	0.151321	1.23481
Afu2g16700	DNA repair protein (RadR), putative	0.366489	1.23494
Afu2g06300	nuclear division rft1 protein	0.0931933	1.2363
Afu2g00310	amino acid transporter, putative	0.330752	1.2408
Afu2g13470	pyrimidine 5'-nucleotidase, putative	0.325953	1.24211
Afu5g06700	serine/threonine protein phosphatase PPT1	0.506881	1.24356
Afu2g05530	histone acetyltransferase (Esa1), putative	0.348359	1.24627
Afu5g04020	DNA damage repair protein (Rad9), putative	0.162254	1.24984
Afu3g13020	hypothetical protein	0.133224	1.25135
Afu7g01500	hypothetical protein	0.371526	1.25445
Afu6g00680	hypothetical protein	0.39457	1.25776
Afu6g06440	proteasome component Prs3, putative	0.266664	1.26327
Afu1g01750	peptidyl-prolyl cis-trans isomerase, putative	0.0255291	1.26346
Afu8g07210	hydroxymethylglutaryl-CoA synthase	0.146913	1.26353
Afu1g06500	hypothetical protein	0.40583	1.26733
Afu2g04820	translation release factor eRF3, putative	0.433145	1.2674
Afu2g16600	DNA polymerase delta large chain	0.533127	1.27118
Afu5g07530	hypothetical protein	-0.0903653	1.27296
Afu2g00220	aminopeptidase, putative	-0.493205	1.27464
Afu4g14680	C6 transcription factor, putative	0.441535	1.27519
Afu2g09870	eukaryotic translation initiation factor 3 subunit EifCg, putative	0.302306	1.27541
Afu2g15220	SNM1 protein	0.430927	1.27701
Afu2g16030	WD repeat protein	0.447326	1.28335
Afu1g06350	virulence related protein (Cap20), putative	0.263356	1.28658
Afu2g12640	hypothetical protein	0.295784	1.28901
Afu2g01570	AP-1 adaptor complex subunit sigma, putative	-0.0345449	1.29056
Afu2g08580	pyridoxine	0.37306	1.29285
Afu7g04560	hypothetical protein	-0.218864	1.29453
Afu2g02110	MSF monosaccharide transporter, putative	0.472782	1.29454
Afu5g04380	conserved hypothetical protein	0.435761	1.29598
Afu3g11300	proteasome component Prs2, putative	0.0764736	1.29704
Afu4g08560	hypothetical protein	0.046608	1.29869
Afu2g03400	proteasome regulatory particle subunit (RpnK), putative	0.0884324	1.30425
Afu2g17330	serine peptidase, family S28, putative	0.187706	1.30586
Afu5g09520	conserved hypothetical protein	0.192471	1.30856
Afu7g00820	hypothetical protein	0.537636	1.31468
Afu1g10030	hypothetical protein	0.166379	1.31648
Afu2g03020	MYB DNA-binding domain protein	-0.0341097	1.31728
Afu2g06230	glutamine amidotransferase:cyclase	0.508125	1.31746
Afu6g13540	carboxypeptidase Y (CpyA), putative	0.476525	1.31851
Afu2g15500	small nuclear ribonucleoprotein SmF, putative	-0.181496	1.32089
Afu2g15570	RAS small monomeric GTPase Rab6, putative	0.510822	1.32145
Afu8g05040	dihydrodipicolinate synthetase family protein	0.406305	1.32218
Afu6g10530	transcriptional elongation regulator (Elongin C), putative	0.251067	1.32668
Afu2g03390	histone deacetylase RpdA	0.000262	1.33041
Afu2g13660	hypothetical protein	0.446217	1.33456
Afu2g15760	poly(A)+ RNA transport protein (UbaA), putative	0.480314	1.33644
Afu2g13370	55 kDa type II phosphatidylinositol 4-kinase	0.537501	1.33739
Afu2g03410	hypothetical protein	0.245982	1.33787
Afu1g16570	G4P04 protein	0.55628	1.33939
Afu2g03700	HMG-CoA reductase	-0.26196	1.33973
Afu3g11400	aspartic endopeptidase Pep2	0.087647	1.34821
Afu1g09650	GPI anchored protein, putative	0.215498	1.35696
Afu7g04820	C6 transcription factor, putative	-0.0228536	1.35748
Afu2g04670	SH3 domain protein	0.447886	1.36097
Afu6g01990	conserved hypothetical protein	-0.113888	1.36469
Afu2g16620	protein kinase, putative	0.512105	1.37036
Afu3g10290	hypothetical protein	0.0390889	1.37199
Afu5g02010	a-pheromone processing metallopeptidase Ste23	0.256527	1.37759
Afu5g02200	Mitochondrial import inner membrane translocase subunit (TIM22), putative	-0.575223	1.37817
Afu4g10350	polyubiquitin (UbiD), putative	0.382856	1.38017
Afu2g11570	F-box domain protein	0.498654	1.38793
Afu5g10680	phosphomevalonate kinase	0.264775	1.38962
Afu2g16400	translation initiation factor 4B	0.308383	1.39192
Afu5g01640	ankyrin repeat protein	0.00359048	1.39252
Afu3g07890	endo alpha-1,4 polygalactosaminidase, putative	-0.364652	1.39921
Afu2g02980	protein-ER retention receptor, putative	0.181618	1.40043
Afu2g04850	hypothetical protein	0.454747	1.40254
Afu2g07420	fimbrin	0.498618	1.40528
Afu7g08310	hypothetical protein	0.0275709	1.40632
Afu2g14610	Oxalate decarboxylase	0.445572	1.41434
Afu6g10290	receptor L domain protein	0.430256	1.41638
Afu2g07810	cytosolic hydroxymethyltransferase, putative	0.284145	1.41654
Afu6g07650	hypothetical protein	-0.287885	1.42046
Afu2g05580	mRNA decapping hydrolase, putative	0.260115	1.42301
Afu2g06310	ATP-dependent RNA helicase, putative	0.514343	1.4251
Afu3g15080	hypothetical protein	0.276257	1.42965
Afu2g07910	myo-inositol transporter	-0.264291	1.43508
Afu2g13850	protein phosphatase regulatory subunit (Gac1), putative	0.0734829	1.44256
Afu1g16450	hypothetical protein	-0.177735	1.4428
Afu3g01970	hypothetical protein	0.308099	1.44979
Afu3g12500	conserved hypothetical protein	0.456449	1.45816
Afu2g11360	bifunctional fatty acid transporter/acyl-CoA synthetase (FAT1), putative	0.233473	1.4664
Afu2g06330	ubiquitin C-terminal hydrolase, putative	0.352324	1.47109
Afu8g06810	hypothetical protein	0.470788	1.47238
Afu1g06580	high expression lethality protein (Hel10), putative	0.217117	1.47308
Afu8g00940	MFS drug transporter, putative	0.482188	1.47997
Afu2g05560	exonuclease, putative	0.384442	1.48134
Afu2g08380	diacylglycerol O-acyltransferase (DgaT), putative	0.0537673	1.48907
Afu2g01140	GPI anchored protein, putative	0.156905	1.49038
Afu1g05400	hypothetical protein	-0.263346	1.49634
Afu1g05540	PXA domain protein	0.130684	1.49676
Afu6g05270	hypothetical protein	-0.0808345	1.4995
Afu5g02090	UPF0047 domain protein	-0.354037	1.50006
Afu1g16550	dihydrouridine synthase family protein, putative	0.522677	1.50488
Afu3g05610	conserved hypothetical protein	0.0768883	1.51022
Afu2g06200	conserved hypothetical protein	0.178849	1.52017
Afu2g12310	HLH transcription factor, putative	0.119066	1.52818
Afu2g02760	protein-tyrosine phosphatase, putative	0.492159	1.53028
Afu6g04770	hypothetical protein	0.398954	1.53112
Afu3g03220	conserved hypothetical protein	0.0805194	1.5399
Afu2g10400	C6 transcription factor, putative	0.039805	1.54112
Afu2g13510	DUF300 domain protein, putative	-0.130539	1.5442
Afu3g00780	cAMP receptor (Car4), putative	-0.194426	1.55455
Afu5g09070	hypothetical protein	0.224071	1.5604
Afu7g08250	conserved hypothetical protein	-0.347308	1.56525
Afu1g09350	FUN81 peptide	0.327896	1.57177
Afu2g02660	DNA topoisomerase III, putative	0.338769	1.58329
Afu2g05010	conserved hypothetical protein	0.107849	1.5982
Afu2g16060	conserved hypothetical protein	0.472828	1.60242
Afu2g06100	DUF907 domain protein	0.321859	1.60488
Afu2g05940	conserved hypothetical protein	0.368335	1.61136
Afu1g09440	ribosomal protein S23 (S12)	0.0714589	1.61899
Afu5g14880	hypothetical protein	-0.189448	1.62933
Afu2g08550	peptidyl-prolyl cis/trans isomerase	0.313427	1.63068
Afu1g05930	serine/threonine protein kinase, putative	0.130652	1.64687
Afu2g17320	conserved hypothetical protein	0.454957	1.64951
Afu5g00620	integral membrane protein, putative	-0.0811107	1.65177
Afu2g17240	C2H2 finger domain protein, putative	0.263123	1.65543
Afu3g10850	DUF821 domain protein	0.0149338	1.65877
Afu2g05440	Hypothetical protein	0.451295	1.65961
Afu2g02650	conserved hypothetical protein	0.495608	1.66194
Afu2g06290	nuclear division rft1 protein	-0.185573	1.66492
Afu1g00700	hypothetical protein	-0.25681	1.67689
Afu7g00530	NACHT and Ankyrin domain protein, putative	0.239288	1.67787
Afu2g09040	vacuolar transporter chaperone (Vtc4), putative	-0.147704	1.69184
Afu4g00250	WD40 repeat protein	0.35093	1.70299
Afu2g06150	disulfide isomerase, putative	-0.438161	1.70504
Afu2g09010	DNA ligase	0.412152	1.70795
Afu2g04860	DNA repair protein Rad4, putative	0.148789	1.72062
Afu5g12630	hypothetical protein	0.268492	1.72429
Afu4g00600	integral membrane protein	0.32871	1.73433
Afu7g01680	hypothetical protein	0.0717663	1.74782
Afu1g06970	hypothetical protein	0.18115	1.77085
Afu2g17790	amino acid transporter, putative	0.554743	1.81106
Afu2g06210	hypothetical protein	0.19525	1.81312
Afu3g06630	hypothetical protein	0.171921	1.81917
Afu2g03520	monocarboxylate transporter, putative	0.332716	1.82067
Afu2g12320	conserved hypothetical protein	-0.00480649	1.82793
Afu3g13600	C6 transcription factor, putative	0.0569224	1.86537
Afu7g00380	GNAT family acetyltransferase, putative	0.322477	1.88219
Afu1g07050	armadillo repeat protein	0.0718347	1.88689
Afu1g06560	alpha-glucosidase, putative	0.0402392	1.89405
Afu2g04570	BNR/Asp-box repeat domain protein	0.287548	1.90355
Afu1g16020	hypothetical protein	-0.0237951	1.91666
Afu6g06530	hypothetical protein	0.482795	1.94894
Afu3g03450	cytochrome P450 pisatin demethylase, putative	-0.243513	1.97482
Afu2g06320	replication protein A 70 kDa DNA-binding subunit	0.466118	2.00021
Afu2g05000	proline iminopeptidase	0.371963	2.02133
Afu2g17780	hypothetical protein	0.483085	2.02912
Afu2g17360	monocarboxylate transporter (Mct), putative	0.167068	2.0555
Afu2g01710	GPI anchored protein, putative	0.550984	2.05715
Afu4g12510	hypothetical protein	0.131572	2.09716
Afu6g10340	hypothetical protein	0.210496	2.16548
Afu7g01040	cytidine deaminase, putative	0.294629	2.19015
Afu4g06610	hypothetical protein	0.187947	2.19647
Afu6g14460	2-haloalkanoic acid dehalogenase	0.255131	2.21362
Afu8g02350	polyketide synthase, putative	0.14519	2.37196
Afu4g12520	hypothetical protein	0.0718453	2.48505
Afu2g07440	thioesterase family protein	0.438117	3.11754
Afu5g00730	H /K ATPase alpha subunit, putative	0.493518	3.42563
Afu2g00500	conserved hypothetical protein	0.206	3.60075

## Sheet: 2
Locus	Common Name	ΔhacA / WT	ΔireA / WT
Afu4g01290	endo-chitosanase, pseudogene	-4.45137	-1.06876
Afu3g08110	cell wall protein, putative	-2.09764	-2.21797
Afu6g04920	NAD-dependent formate dehydrogenase	-1.87282	-1.99058
Afu5g14830	glyoxalase family protein	-1.7155	-1.60272
Afu6g00650	hypothetical protein	-1.65807	-2.15468
Afu5g14210	glucose-repressible gene protein-related protein	-1.64493	-2.33814
Afu6g00740	hypothetical protein	-1.63733	-3.6256
Afu5g06240	alcohol dehydrogenase, putative	-1.61138	-3.16036
Afu6g14410	amidase family protein	-1.6006	-1.34473
Afu5g02330	major allergen Asp F1	-1.58951	-1.00629
Afu1g04890	translocon subunit	-1.58581	-0.870645
Afu3g12190	RING finger domain protein, putative	-1.57891	-2.44145
Afu1g14540	oxidoreductase, short-chain dehydrogenase/reductase family	-1.53847	-2.95622
Afu1g14530	general amidase-B	-1.52885	-0.749752
Afu2g10960	alcohol dehydrogenase, putative	-1.52246	-1.63853
Afu3g13660	Ctr copper transporter family protein	-1.52005	-3.30064
Afu5g14660	GABA permease, putative	-1.47194	-1.44671
Afu6g13750	ferric-chelate reductase, putative	-1.45711	-2.19272
Afu3g13110	extracellular serine-threonine rich protein	-1.43141	-1.31706
Afu2g15850	phytanoyl-CoA dioxygenase family protein	-1.4268	-1.27891
Afu5g09970	67 kDa myosin-cross-reactive antigen family protein	-1.41853	-2.44988
Afu1g17020	UDP-glucose dehydrogenase	-1.41483	-1.70984
Afu5g14650	RING finger protein	-1.40908	-1.49661
Afu3g15330	hypothetical protein	-1.39855	-2.51749
Afu4g08960	GPI anchored protein, putative	-1.38187	-2.38719
Afu8g06870	MFS sugar transporter, putative	-1.38153	-0.867037
Afu3g07310	conserved hypothetical protein	-1.37851	-2.52226
Afu5g03800	high-affinity iron permease CaFTR2	-1.3725	-1.72463
Afu6g00730	hypothetical protein	-1.36642	-2.1267
Afu6g13330	conserved hypothetical protein	-1.36121	-2.64275
Afu3g00590	Asp-hemolysin	-1.35876	-2.61038
Afu1g17040	D-lactate dehydrogenase	-1.34834	-2.61047
Afu4g09870	hypothetical protein	-1.29887	-1.21566
Afu1g14550	Mn superoxide dismutase MnSOD	-1.28601	-2.19325
Afu5g13550	hypothetical protein	-1.2564	-1.39124
Afu3g11010	suppressor of meiotic silencing	-1.24913	-1.18596
Afu1g14560	alpha-mannosidase	-1.23506	-0.963093
Afu3g01580	GMC oxidoreductase, putative	-1.22942	-2.04427
Afu5g14810	pyruvate decarboxylase, putative	-1.22813	-1.70697
Afu7g04110	protein kinase C substrate, putative	-1.2279	-0.60502
Afu6g10080	conserved hypothetical protein	-1.2197	-2.67401
Afu4g13770	glycosyl hydrolase, putative	-1.21793	-1.59064
Afu4g14250	hypothetical protein	-1.20792	-1.59001
Afu6g14340	glucooligosaccharide oxidase, putative	-1.20689	-0.739582
Afu2g17920	hypothetical protein	-1.20459	0.607961
Afu7g02120	hypothetical protein	-1.19341	-1.16022
Afu3g11070	pyruvate decarboxylase PdcA, putative	-1.19248	-3.29343
Afu1g10750	prolyl-tRNA synthetase	-1.1769	-0.881365
Afu8g04620	hypothetical protein	-1.16393	-1.36221
Afu4g06890	14-alpha sterol demethylase Cyp51A	-1.15377	-1.57253
Afu5g02850	conserved hypothetical protein	-1.1519	-1.86083
Afu4g13780	polyphenol monooxygenase, putative	-1.14487	-1.09493
Afu2g15490	TPR domain protein	-1.14421	-1.41536
Afu5g07480	hypothetical protein	-1.14051	-1.27178
Afu6g01940	conserved hypothetical protein	-1.13068	-2.35173
Afu5g01800	DNA repair protein rad14	-1.11943	-0.870172
Afu6g00310	serine carboxypeptidase (CpdS), putative	-1.11889	-2.39814
Afu5g10940	conserved hypothetical protein	-1.11294	-3.00564
Afu3g06190	Cytochrome c oxidase subunit VIa family	-1.10195	-1.72633
Afu7g05070	FAD dependent oxidoreductase, putative	-1.10174	-2.67781
Afu6g03510	polyamine oxidase, putative	-1.09991	-1.11829
Afu3g06720	ThiJ/PfpI family protein	-1.09893	-3.00983
Afu7g06010	conserved hypothetical protein	-1.09637	-1.12475
Afu3g03410	enoyl-CoA hydratase/isomerase family protein	-1.09246	0.76162
Afu6g07670	cytochrome c oxidase assembly protein cox15	-1.08782	-1.93901
Afu5g06910	DUF636 domain protein	-1.08718	-2.48146
Afu1g05320	disulfide isomerase, putative	-1.08489	-1.03112
Afu4g14240	O-methyltransferase	-1.08011	-1.15635
Afu6g09740	thioredoxin reductase GliT	-1.07796	-1.37329
Afu2g03780	conserved hypothetical protein	-1.07533	-0.679751
Afu5g07490	steroid monooxygenase [imported]	-1.07139	-0.705698
Afu7g06030	alpha-ketoglutarate-dependent taurine dioxygenase	-1.06388	-1.02835
Afu5g14680	hypothetical protein	-1.06307	-2.67165
Afu3g07510	hypothetical protein	-1.0622	-1.13351
Afu1g07220	6-phosphofructo-2-kinase 1	-1.05087	-3.084
Afu6g12220	isochorismatase family hydrolase, putative	-1.04559	-2.39595
Afu3g03560	pyridine nucleotide-disulfide oxidoreductase, putative	-1.04361	-0.761441
Afu5g03240	pyruvate dehydrogenase kinase, putative	-1.0398	-1.51838
Afu4g07150	cytochrome-c oxydase chain VIIc-like protein	-1.03784	-1.15889
Afu1g02620	hypothetical protein	-1.0376	-1.0389
Afu6g00750	pyruvate decarboxylase, putative	-1.03322	-2.04432
Afu7g06060	siderochrome-iron transporter (Sit1), putative	-1.0306	-1.60707
Afu6g14420	disintegrin-like metalloproteinase, putative	-1.03045	-0.975752
Afu3g13620	conserved hypothetical protein	-1.03001	-0.98611
Afu5g02820	hypothetical protein	-1.02469	0.789635
Afu3g00500	integral membrane protein	-1.0204	-1.02564
Afu4g12710	hypothetical protein	-1.01887	-1.27904
Afu1g03720	UPF0136 domain protein	-1.00993	-1.2103
Afu7g05490	hypothetical protein	-0.998807	1.26803
Afu2g17000	PT repeat family protein	-0.990064	-1.54105
Afu7g03770	hypothetical protein	-0.986878	-0.885774
Afu2g12050	ZIP metal ion transporter, putative	-0.985808	0.789809
Afu8g05140	oxidoreductin	-0.985366	-1.66677
Afu2g05170	hypothetical protein	-0.984798	-0.968135
Afu6g13760	alpha-1,2-mannosidase, putative subfamily	-0.980197	-1.14183
Afu5g11630	hypothetical protein	-0.979356	-0.745142
Afu1g17350	CP2 transcription factor, putative	-0.967638	-1.37703
Afu2g00440	hypothetical protein	-0.963923	-1.5917
Afu3g00810	cholestenol delta-isomerase, putative	-0.958943	-1.07485
Afu2g14140	hypothetical protein	-0.953272	-1.74028
Afu4g06410	hypothetical protein	-0.952693	-1.94188
Afu6g00720	LysM domain protein, putative	-0.947993	-2.1402
Afu4g14230	MFS transporter, putative	-0.944511	-1.1224
Afu1g13660	phenol 2-monooxygenase, putative	-0.940133	-1.10041
Afu8g01320	hypothetical protein	-0.938773	-1.15613
Afu1g10430	hypothetical protein	-0.933814	-0.788012
Afu2g15430	L-xylulose reductase	-0.929896	-1.41342
Afu3g06020	glyoxalase family protein family	-0.927716	-1.47916
Afu5g09270	conserved hypothetical protein	-0.927588	-0.74
Afu5g02860	integral membrane protein, putative	-0.926856	-1.14495
Afu2g06280	oligosaccharyl transferase subunit (gamma), putative	-0.921381	1.17638
Afu1g17010	glutathione S-transferase	-0.919266	-1.28973
Afu5g03520	hypothetical protein	-0.919097	-1.03548
Afu5g14330	CPRD8 protein	-0.915369	-0.737058
Afu2g05990	conserved hypothetical protein	-0.902016	-1.11942
Afu2g02360	UDP-glucose:glycoprotein glucosyltransferase, putative	-0.887982	0.954641
Afu4g11250	carbonic anhydrase family protein	-0.884028	-1.74499
Afu3g06460	conserved hypothetical protein	-0.883834	-1.01121
Afu4g00390	glycosyl hydrolase, putative	-0.878339	-0.936461
Afu1g05220	selenoprotein domain protein	-0.876986	-1.46848
Afu8g07130	AhpC/TSA family thioredoxin peroxidase, putative	-0.874229	-0.732635
Afu6g04370	hypothetical protein	-0.871804	-1.22928
Afu7g01590	cystathionine gamma-synthase	-0.870523	-0.764781
Afu2g14520	hydrolase, putative	-0.867489	-1.1204
Afu4g11550	hypothetical protein	-0.865708	-1.09555
Afu1g14520	pyridine nucleotide-disulphide oxidoreductase, putative	-0.865508	-0.662554
Afu2g05810	dienelactone hydrolase	-0.864102	-1.6488
Afu2g05980	conserved hypothetical protein	-0.860605	-1.25424
Afu4g10410	aspartate aminotransferase, putative	-0.86	0.747806
Afu1g14650	WD repeat protein	-0.855483	-1.18365
Afu3g14440	cytochrome c oxidase family protein	-0.855026	-1.51667
Afu1g17550	HET domain protein	-0.846109	-1.21056
Afu4g08710	short chain dehydrogenase, putative	-0.842706	-1.0475
Afu3g00370	phosphoketolase, putative	-0.838199	-2.71435
Afu5g13570	conserved hypothetical protein	-0.835287	-0.834436
Afu1g09420	conserved hypothetical protein	-0.833033	-0.859777
Afu4g00820	reverse transcriptase, RNaseH	-0.828057	1.41841
Afu7g06230	hypothetical protein	-0.824145	1.09196
Afu1g15130	GPI anchored transmidase, putative	-0.81133	0.674816
Afu3g12180	C6 transcription factor, putative	-0.810813	-1.46402
Afu6g04030	conserved hypothetical protein	-0.809503	-1.26881
Afu7g02420	malate dehydrogenase, putative	-0.804862	-1.5056
Afu5g08100	hypothetical protein	-0.803345	-0.859023
Afu3g01590	hypothetical protein	-0.79965	-1.89788
Afu2g12510	hypothetical protein	-0.796531	-1.42635
Afu3g00310	extracellular phytase, putative	-0.794382	-0.763925
Afu3g07360	mitochondrial metallochaperone Sco1, putative	-0.793811	-1.05465
Afu6g09100	hypothetical protein	-0.792697	-1.54453
Afu8g00920	UDP-glucose dehydrogenase Uxs2p	-0.790266	-0.927782
Afu6g09520	hypothetical acetyl hydrolase	-0.789693	-1.27602
Afu6g10120	oxidoreductase, zinc-binding	-0.787119	-2.30444
Afu4g10130	alpha-amylase (Amy1), putative	-0.785331	-1.04498
Afu2g12560	hypothetical protein	-0.777771	-0.82563
Afu3g04070	bZIP transcription factor (HacA), putative	-0.767889	0.678567
Afu3g00820	putative exported protein	-0.763472	-0.684984
Afu7g04690	FAD dependent sulfhydryl oxidase Erv2, putative	-0.760214	-1.66753
Afu3g13650	integral membrane protein	-0.759535	-1.95375
Afu5g09930	hypothetical protein	-0.759529	-1.33774
Afu2g01010	myo-inositol-phosphate synthase, putative	-0.758531	-0.968267
Afu8g01110	integral membrane protein, putative	-0.756419	-0.685757
Afu7g06780	hypothetical protein	-0.755564	-1.10665
Afu3g08830	hypothetical protein	-0.754931	-0.83928
Afu4g00660	sensor histidine kinase/response regulator, putative	-0.754049	-1.61477
Afu5g06230	gaba-specific permease	-0.751592	-2.08014
Afu1g13550	hypothetical protein	-0.750475	-1.95624
Afu8g04560	integral membrane protein	-0.749439	-0.728803
Afu5g02270	C6 transcription factor, putative	-0.744079	-1.31299
Afu7g05580	hypothetical protein	-0.740681	-2.80502
Afu3g08450	hypothetical protein	-0.739273	-1.21729
Afu1g13360	C4-dicarboxylate transporter/malic acid transport protein, putative	-0.737831	-1.40219
Afu5g02750	cytochrome c oxidase subunit Va, putative	-0.735696	-1.40623
Afu4g13380	conserved hypothetical protein	-0.731742	-1.83077
Afu3g14470	Pyridoxal-phosphate dependent enzyme, putative	-0.726371	-1.62363
Afu6g06420	mitochondrion biogenesis protein (Mdm31), putative	-0.725793	0.655041
Afu4g13630	PE repeat family protein	-0.718284	-1.17937
Afu8g06490	conserved hypothetical protein	-0.714847	-0.779142
Afu3g12200	small oligopeptide transporter, OPT family	-0.713312	-1.4762
Afu5g14740	fucose-specific lectin	-0.709223	-0.71008
Afu5g02470	thiamine biosynthesis protein (Nmt1), putative	-0.708778	-0.998633
Afu2g00320	sterol delta 5,6-desaturase, putative	-0.706388	-0.675112
Afu2g01890	CAT5 protein	-0.704938	-0.862543
Afu6g08440	protoporphyrinogen oxidase, putative	-0.704599	-1.53206
Afu3g06040	glutaryl-CoA dehydrogenase, putative	-0.703065	-1.29094
Afu6g00640	integral membrane protein	-0.702975	-0.93481
Afu2g00720	aldehyde dehydrogenase, putative	-0.70163	-0.953891
Afu1g06110	conserved hypothetical protein	-0.701566	-1.32563
Afu8g04650	3-hydroxyanthranilate 3,4-dioxygenase	-0.700985	-0.989324
Afu5g14340	oxidoreductase, short-chain dehydrogenase/reductase family, putative	-0.700365	-0.773737
Afu1g09030	hypothetical protein	-0.698733	-2.5103
Afu6g08130	hypothetical protein	-0.697398	-1.18394
Afu1g02340	hypothetical protein	-0.695061	-0.944064
Afu7g01010	alcohol dehydrogenase, putative	-0.690657	-2.39151
Afu4g09750	60S ribosomal protein L7/L12 precursor	-0.689531	-0.608226
Afu6g00630	MFS transporter, putative	-0.688308	-0.996672
Afu2g15560	V-ATPase proteolipid subunit (Ppa1), putative	-0.688072	1.39658
Afu6g03770	oxidoreductase (Msc7), putative	-0.686029	-1.72206
Afu1g10350	phosphoglycerate kinase PgkA, putative	-0.68538	-1.04245
Afu6g09730	cytochrome P450 oxidoreductase GliF	-0.684193	-1.48943
Afu3g07140	developmental regulator FluG	-0.683571	-0.967831
Afu3g08900	tubulin-specific chaperone c, putative	-0.67914	-2.00708
Afu5g04250	homocysteine synthase, putative	-0.678917	-0.890138
Afu1g07400	hypothetical protein	-0.678048	-1.90242
Afu6g10720	alpha-ketoglutarate-dependent taurine dioxygenase	-0.676598	-0.905135
Afu5g10650	pyridoxamine phosphate oxidase, putative	-0.674143	-2.06007
Afu6g07360	ribosomal protein S8	-0.671917	0.78024
Afu1g17170	alpha-ketoglutarate-dependent taurine dioxygenase	-0.671231	-1.4994
Afu6g08320	conserved hypothetical protein	-0.668373	-1.20487
Afu6g14440	MFS monosaccharide transporter, putative	-0.667356	0.702827
Afu7g01430	opsin 1	-0.665932	-1.09339
Afu1g14340	metalloreductase, putative	-0.663195	-0.907071
Afu5g00590	hypothetical protein	-0.662825	-1.61794
Afu1g17030	glycosyl transferase, putative	-0.661738	-2.06817
Afu3g11340	transthyretin domain protein	-0.658838	-1.17363
Afu2g01940	conserved hypothetical protein	-0.656758	-0.7941
Afu1g01380	alpha-1,6-mannosyltransferase subunit (Hoc1), putative	-0.654472	0.651902
Afu6g10450	hypothetical protein	-0.654011	-1.64673
Afu1g17360	bZIP transcription factor (BACH2), putative	-0.653525	-1.10206
Afu6g04910	leucyl-tRNA synthetase	-0.653323	-0.646668
Afu3g07980	conserved hypothetical protein	-0.65246	-1.97605
Afu5g08640	hypothetical protein	-0.651847	-1.15192
Afu1g03150	c-14 sterol reductase	-0.650325	-1.68601
Afu7g01700	hypothetical protein	-0.648298	-1.07432
Afu6g12500	AhpC/TSA family protein	-0.646036	-0.753038
Afu3g10910	glutaminase A	-0.645314	-1.00856
Afu6g14000	Tri7-like toxin biosynthesis protein, putative	-0.641263	-0.82672
Afu8g05460	bZIP transcription factor, putative	-0.641217	-1.04989
Afu8g05470	hypothetical protein	-0.641204	-1.14859
Afu2g11480	conserved hypothetical protein	-0.64079	-0.693995
Afu1g06940	chorismate synthase	-0.640731	-0.830104
Afu3g01330	class II aldolase/adducin domain protein	-0.640223	-0.757742
Afu7g05400	conserved hypothetical protein	-0.640215	-1.10407
Afu2g01530	conserved hypothetical protein	-0.634843	0.899087
Afu2g16410	hypothetical protein	-0.633674	0.759206
Afu2g09530	PUTATIVE SIGNAL PEPTIDE PROTEIN	-0.630386	-1.40791
Afu4g10330	CaaX farnesyltransferase beta subunit Ram1	-0.630243	-1.23104
Afu1g04310	hypothetical protein	-0.629776	-1.00885
Afu7g04970	metalloreductase, putative	-0.628408	0.894882
Afu5g14840	hypothetical protein	-0.628335	-0.887194
Afu5g10560	cytochrome c oxidase subunit V	-0.627906	-0.914191
Afu5g02240	NAD dependent epimerase/dehydratase family protein	-0.625528	-0.773853
Afu1g13930	Leucine carboxyl methyltransferase superfamily	-0.624715	-0.85854
Afu5g02920	nitrogen metabolite repression regulator NmrA	-0.624705	-1.09016
Afu3g14570	histidine acid phosphatase, putative	-0.620368	-0.669042
Afu3g00900	alpha-amylase AmyA	-0.619235	-1.24788
Afu1g04680	NifU-related protein	-0.618527	-0.802849
Afu1g17630	FAD/FMN-containing protein	-0.6184	-1.54477
Afu4g06790	ubiquinol-cytochrome c reductase complex 14 kDa protein	-0.61675	-0.867384
Afu2g04250	C6 finger domain protein, putative	-0.614285	0.603538
Afu5g10950	hypothetical protein	-0.613648	-1.78329
Afu6g01950	hypothetical protein	-0.612848	-2.29507
Afu2g16120	translocon-associated protein, alpha subunit, putative	-0.612808	0.725241
Afu1g13480	ubiquinol-cytochrome C reductase complex subunit UcrQ, putative	-0.607219	-0.64336
Afu7g04730	siderochrome-iron transporter, putative	-0.606397	-0.604831
Afu4g09910	conserved hypothetical protein	-0.60567	-1.22432
Afu4g06910	outer mitochondrial membrane protein porin	-0.605465	-0.83377
Afu7g03970	hypothetical protein	-0.604255	-0.730207
Afu2g08340	hypothetical protein	-0.60381	-0.74427
Afu6g07340	kynurenine 3-monooxygenase	-0.602242	-1.48369
Afu6g07320	drug resistance transporter, EmrB/QacA family, putative	-0.601409	-0.804629
Afu3g03720	hypothetical protein	-0.600972	-1.62762
Afu5g13100	hypothetical protein	-0.597516	-1.62415
Afu5g02840	sugar transporter family protein, putative	-0.597247	-1.69774
Afu2g17930	integral membrane protein	-0.586946	2.85967
Afu2g11060	Acyl CoA binding protein family	-0.585547	-0.825811
Afu2g05460	NA	-0.584461	0.701684
Afu3g14910	extracellular signalling protein (factor C), putative	-0.584226	-0.659447
Afu4g08920	protein kinase, putative	-0.583874	-0.956841
Afu3g08400	SNF2 family helicase/ATPase, putative	0.580928	0.929115
Afu5g04420	splicing factor 3b, subunit 2, 145kD	0.581767	0.791666
Afu1g14770	tRNA dihydrouridine synthase, putative	0.582484	0.816548
Afu2g17520	GNAT family N-acetyltransferase, putative	0.582808	1.69741
Afu4g06140	dipeptidyl peptidase III	0.5858	0.623569
Afu3g10620	transcription initiation protein	0.58587	0.645019
Afu2g05550	conserved hypothetical protein	0.586221	1.70456
Afu6g04300	conserved hypothetical protein	0.58729	0.852332
Afu2g15090	hypothetical protein	0.588603	0.968895
Afu5g10730	hypothetical protein	0.590082	0.669394
Afu1g01640	kinesin family protein	0.590775	1.19891
Afu2g02390	hypothetical protein	0.592432	0.940893
Afu4g10460	homocitrate synthase	0.592945	0.718462
Afu5g08900	D-arabinitol dehydrogenase ArbD, putative	0.596912	0.636222
Afu6g02860	isocitrate lyase	0.597608	0.878197
Afu3g06530	ATP sulphurylase	0.598362	0.592241
Afu3g09820	C2H2 transcription factor, putative	0.599265	0.705688
Afu3g08620	csh3 protein	0.601314	1.35985
Afu6g12630	leucyl-tRNA synthetase	0.604309	0.74602
Afu2g14130	ubiquitin C-terminal hydrolase, putative	0.606557	0.883727
Afu2g03290	14-3-3 family protein ArtA, putative	0.608234	0.98255
Afu3g02820	hypothetical protein	0.608806	1.04069
Afu1g14850	acyl-CoA dehydrogenase, putative	0.609125	0.814982
Afu8g02120	conserved hypothetical protein	0.612112	1.62603
Afu2g13680	calcium/calmodulin-dependent protein kinase, putative	0.612789	1.49064
Afu6g08260	conserved hypothetical protein	0.61632	1.05788
Afu2g04060	NADH:flavin oxidoreductase/NADH oxidase family protein	0.618051	1.12082
Afu1g15720	importin beta-1 subunit	0.619132	0.658614
Afu4g11140	DNA polymerase iota, putative	0.620434	0.812865
Afu2g03560	two-component osmosensing histidine kinase (Bos1), putative	0.621655	1.3017
Afu5g08200	hypothetical protein	0.623332	-0.665454
Afu2g05490	HEAT repeat protein	0.625366	1.50398
Afu1g15270	ATP-dependent Clp protease, putative	0.626122	-1.43838
Afu2g13070	arginine-tRNA-protein transferase 1	0.628124	0.778178
Afu6g08390	conserved hypothetical protein	0.63131	1.6114
Afu6g13030	cell division control protein Cdc4, putative	0.633614	0.980863
Afu5g05680	peptide chain release factor eRF/aRF, subunit 1	0.635548	0.851083
Afu7g06750	phosphoglycerate mutase family protein, putative	0.639873	2.44756
Afu6g12290	PH domain protein	0.641528	0.905662
Afu1g04860	hypothetical protein	0.648575	0.839751
Afu4g13210	hypothetical protein	0.648797	1.08293
Afu5g09640	conserved fungal protein	0.649685	1.23504
Afu3g00690	C6 transcription factor, putative	0.650482	0.598892
Afu6g14260	conserved hypothetical protein	0.651461	1.07947
Afu1g10240	hypothetical protein	0.651918	0.60389
Afu6g14050	FAD binding domain protein	0.652878	0.824172
Afu7g04310	cell division control protein Cdc6, putative	0.65332	1.39095
Afu5g12500	hypothetical protein	0.654443	1.22855
Afu7g03780	YT521-B-like splicing factor, putative	0.654775	-0.791365
Afu3g07570	conserved hypothetical protein	0.657181	0.617822
Afu4g08440	Patatin-like serine hydrolase, putative	0.659968	1.09669
Afu3g03050	RNAse III, putative	0.661466	1.02856
Afu2g07870	Patatin-like serine hydrolase, putative	0.664468	0.919204
Afu6g02850	C6 finger domain protein, putative	0.665825	0.878766
Afu4g08750	hypothetical protein	0.666011	0.96154
Afu2g10010	nonsense-mediated mRNA decay protein (Nmd5), putative	0.666704	1.2375
Afu3g07740	hypothetical protein	0.670481	0.96403
Afu7g05860	Zinc finger, C3HC4 type (RING finger) domain protein	0.670881	1.72887
Afu4g07560	MYB and HSA domain protein	0.67384	1.4147
Afu2g13770	C2H2 finger domain protein FlbC	0.674247	1.16782
Afu2g04970	Kelch repeats protein, putative	0.676014	1.45799
Afu5g10570	cofilin	0.677471	0.88589
Afu1g07680	Ras-related GTPase (Rab2), putative	0.67801	1.40495
Afu1g13850	conserved hypothetical protein	0.679073	1.30645
Afu5g07330	carboxypeptidase S1, putative	0.679658	0.605643
Afu3g14130	hypothetical protein	0.679674	1.32208
Afu3g03060	cell wall protein (PhiA), putative	0.680457	1.22526
Afu2g02320	Hsp70 chaperone (BiP), putative	0.681941	0.678327
Afu5g03320	TFIIH complex helicase (RAD25), putative	0.683929	0.708364
Afu5g05590	aspartokinase	0.689274	0.838528
Afu5g09060	RNA binding protein, putative	0.689489	0.614039
Afu2g10330	conserved hypothetical protein	0.689556	1.22491
Afu4g07950	hypothetical protein	0.691296	0.674511
Afu1g10770	neutral amino acid permease, putative	0.691747	1.70427
Afu1g09930	glycerol dehydrogenase (GCY1), putative	0.694991	0.998488
Afu3g09130	C6 transcription factor, putative	0.697118	1.10601
Afu3g14420	chitin synthase G	0.699061	1.13711
Afu7g00850	acetyltransferase, GNAT family, putative	0.700846	1.29279
Afu6g10280	conserved hypothetical protein	0.704655	1.23421
Afu2g02710	60S ribosomal protein (Rlp24), putative	0.708009	1.29859
Afu7g01480	cap binding protein	0.712868	0.742591
Afu8g00840	amino acid permease, putative	0.715721	-0.790725
Afu3g05870	IFRD domain protein	0.716235	1.21791
Afu2g13890	annexin ANXC3.2	0.720235	1.77495
Afu2g09240	F-box protein (Pof7), putative	0.723103	0.88017
Afu2g09630	hypothetical protein	0.723846	1.79801
Afu1g13910	TFIIH complex helicase (RAD3), putative	0.724532	1.2178
Afu7g02510	hypothetical protein	0.725646	1.82816
Afu2g02890	tRNA splicing 2' phosphotransferase 1	0.725946	0.980502
Afu3g03330	mitochondrial enoyl reductase, putative	0.729349	-1.76602
Afu7g03690	G-patch RNA maturation protein (Gno1), putative	0.733797	0.594906
Afu3g00180	short chain dehydrogenase, putative	0.734844	-1.69849
Afu2g02780	KH domain protein	0.735022	1.11992
Afu2g13740	conserved hypothetical protein	0.738904	0.763425
Afu8g01260	hypothetical protein	0.74144	1.91615
Afu2g10240	NAD binding Rossmann fold oxidoreductase, putative	0.741531	1.27241
Afu2g09270	hypothetical protein	0.741661	1.10187
Afu1g09700	ankyrin repeat protein	0.74448	0.926465
Afu5g03060	hypothetical protein	0.745004	0.891289
Afu5g01650	bZIP transcription factor JlbA/IDI-4, putative	0.747194	1.20156
Afu2g02590	aspartyl-tRNA synthetase	0.748095	0.995357
Afu2g04100	hypothetical protein	0.749395	1.07572
Afu2g14640	F-box domain protein	0.75689	0.777266
Afu2g06070	NA	0.767179	1.17102
Afu8g01540	hypothetical protein	0.768575	1.2443
Afu3g06850	hypothetical protein	0.771383	0.852832
Afu1g11220	GPI anchored protein, putative	0.771981	0.723327
Afu2g11180	developmental regulator FlbA	0.772341	0.854212
Afu3g10370	conserved hypothetical protein	0.772951	2.30496
Afu5g04010	tRNA-splicing endonuclease subunit SEN2,putative	0.773238	1.08986
Afu5g07230	carboxyphosphonoenolpyruvate phosphonomutase-like protein	0.774702	1.20033
Afu6g04830	HATPase_c domain protein, putative	0.774846	1.81215
Afu2g03610	IMP dehydrogenase, putative	0.775212	0.97069
Afu8g05650	hypothetical protein	0.77561	1.626
Afu4g00860	conserved hypothetical protein	0.778367	0.769542
Afu6g14060	hypothetical protein	0.779998	0.759108
Afu4g01000	MFS transporter, putative	0.78094	0.847861
Afu6g04690	hypothetical protein	0.784287	1.20111
Afu2g16750	nonsense-mediated mRNA decay protein 3	0.789018	1.11188
Afu3g14400	hypothetical protein	0.794321	2.22186
Afu7g03820	DNA excision repair protein (Rad16), putative	0.79597	0.920522
Afu3g09970	ccc1 protein	0.796516	1.49613
Afu3g12320	DUF676 domain protein	0.796979	0.886514
Afu2g02220	UDP-glucose:sterol glycosyltransferase	0.798471	1.87917
Afu3g00530	ATP/GTP-binding protein, putative	0.804504	0.840862
Afu4g09080	C2H2 transcription factor (Seb1), putative, putative	0.804612	0.602626
Afu4g06900	asparagine synthetase (glutamine-hydrolyzing) 2	0.807365	0.629679
Afu5g12050	DNA ligase, putative	0.810075	1.15714
Afu5g03710	conserved hypothetical protein	0.810519	0.763306
Afu7g03800	C2 domain protein	0.811206	1.15193
Afu1g14800	hypothetical protein	0.813018	1.57949
Afu1g15430	lipase/esterase, putative	0.816162	1.13507
Afu1g14450	exo-beta-1,3-glucanase Exg0	0.81968	0.980751
Afu2g13500	hypothetical protein	0.820777	0.715132
Afu4g09300	hypothetical protein	0.820904	1.41758
Afu2g02620	Ku family DNA helicase, putative	0.825366	1.75406
Afu3g08630	coactivator bridging factor 1 (Mbf1), putative	0.8276	0.726387
Afu4g06670	allergen Asp F7	0.828491	1.41303
Afu2g02080	C2H2 finger domain protein, putative	0.831326	2.22337
Afu2g03070	hypothetical protein	0.832206	2.52163
Afu2g01160	C-4 methyl sterol oxidase, putative	0.833206	1.45328
Afu2g15800	conserved hypothetical protein	0.835346	1.06568
Afu1g09710	hypothetical protein	0.838343	0.773976
Afu2g00580	hypothetical protein	0.838903	1.62434
Afu2g01720	conserved hypothetical protein	0.841179	1.90866
Afu2g04000	Png1p	0.843507	0.946593
Afu2g17140	conserved hypothetical protein	0.846454	1.21522
Afu4g13990	hypothetical protein	0.847498	3.1982
Afu2g02050	peptidyl-prolyl cis-trans isomerase, putative	0.849945	2.52585
Afu2g16490	rhomboid family membrane protein	0.850941	0.710723
Afu4g11330	Aha1 domain family	0.851676	1.16421
Afu7g05760	hypothetical protein	0.861278	1.19268
Afu2g08990	eukaryotic translation initiation factor 5	0.861539	1.28153
Afu5g01620	extracellular proline-rich protein	0.867222	3.6164
Afu6g12910	dsDNA-dependent ATPase (Rad54), putative	0.875497	1.05808
Afu2g03060	cactin	0.876059	0.987394
Afu6g08270	hypothetical protein	0.876418	0.989784
Afu2g16360	DRAP deaminase (Rib2), putative	0.879304	0.714712
Afu1g07750	FUN19 protein	0.87964	0.750881
Afu3g01500	integral membrane protein	0.882699	1.17557
Afu4g13940	ubiquitin conjugating enzyme, putative	0.88888	1.04639
Afu1g08870	hypothetical protein	0.894907	1.49563
Afu4g07090	C2H2 finger domain protein, putative	0.897853	1.2531
Afu4g06220	conserved hypothetical protein	0.898482	0.662884
Afu2g15170	conserved hypothetical protein	0.898559	1.26211
Afu3g14230	BAR adaptor protein RVS167, putative	0.899179	1.52922
Afu2g15900	conserved hypothetical protein	0.899798	0.988092
Afu8g02110	hypothetical protein	0.900386	1.11547
Afu2g04460	conserved hypothetical protein	0.906642	0.923375
Afu5g11420	related to ser/arg-related nuclear matrix protein	0.907267	0.832907
Afu1g13230	conserved hypothetical protein	0.90728	1.22811
Afu3g11280	class V chitinase, putative	0.917065	1.02472
Afu6g04680	MIPC synthase subunit (SurA), putative	0.91715	0.898753
Afu1g16760	acetyltransferase, GNAT family family	0.921762	0.626613
Afu6g06900	Rho GTPase Rho1	0.930197	1.04312
Afu5g05580	conserved hypothetical protein	0.934171	0.901095
Afu1g03380	UDP-N-acetylglucosaminyltransferase	0.937284	1.17164
Afu7g03910	C2H2 zinc finger protein	0.943185	1.61287
Afu5g01840	conserved hypothetical protein	0.951143	1.74094
Afu6g07410	hypothetical protein	0.951706	0.651569
Afu3g14150	F-box domain protein	0.953219	1.08959
Afu4g13950	GNAT family acetyltransferase, putative	0.955056	0.807145
Afu3g00740	2-dehydropantoate 2-reductase, putative	0.956624	1.01149
Afu2g17110	cell division control protein Cdc48	0.959365	1.22526
Afu3g10120	TATA-box binding protein	0.961769	1.09169
Afu5g13070	hypothetical protein	0.962207	0.620879
Afu2g13290	GYF domain protein	0.964345	1.37181
Afu2g02990	MYB DNA-binding domain protein	0.968087	1.47334
Afu6g09090	conserved hypothetical protein	0.970382	0.597208
Afu5g12410	hypothetical protein	0.9755	0.663513
Afu6g07970	calpain-like protein	0.978033	1.17568
Afu1g16460	bZIP transcription factor (LziP), putative	0.980399	0.643107
Afu7g04700	conserved hypothetical portein	0.981614	1.08227
Afu4g11130	conserved hypothetical protein	0.983222	1.72333
Afu6g12540	RING finger protein	0.988309	1.25363
Afu1g07570	hypothetical protein	0.992762	1.84371
Afu3g14670	MFS transporter, putative	0.997259	0.908197
Afu2g10130	phase-specific adhesin, putative	1.00112	2.33355
Afu4g00220	metallo-beta-lactamase domain protein	1.00981	0.985452
Afu1g05040	protein mitochondrial targeting protein (Mas1), putative	1.01137	1.13536
Afu5g04170	molecular chaperone HSP90	1.02011	0.832074
Afu8g01760	hypothetical protein	1.02413	2.13367
Afu8g01840	hypothetical protein	1.02491	2.31194
Afu1g12610	Hsp70 chaperone Hsp88	1.02606	1.02705
Afu2g02060	D-tyrosyl-tRNA(Tyr) deacylase	1.03202	0.768646
Afu8g02130	1,3-beta-glucanosyltransferase, putative	1.03556	1.48395
Afu4g06660	hypothetical protein	1.03743	1.621
Afu6g14120	hypothetical protein	1.03756	0.993831
Afu2g14590	MFS monosaccharide transporter, putative	1.0411	0.976825
Afu7g05650	glutamine-serine rich protein MS8, putative	1.0426	1.7027
Afu4g01140	MFS multidrug transporter, putative	1.05687	0.995475
Afu4g01160	von Willebrand domain protein	1.05789	1.81635
Afu4g08970	PAP2 domain protein	1.06625	1.49617
Afu3g08010	C2H2 transcription factor (Ace1), putative	1.06925	1.3516
Afu1g13310	hypothetical protein	1.06972	1.18145
Afu6g10840	hypothetical protein	1.07676	1.51732
Afu2g10910	maltose permease	1.07699	1.27675
Afu2g05880	ammonium transporter MEAA	1.09182	0.608956
Afu8g05800	C6 finger domain protein, putative	1.09976	1.44842
Afu3g07070	MYB DNA-binding domain protein	1.10969	1.7211
Afu6g01830	O-methyltransferase, putative	1.11612	1.65533
Afu2g17810	RTA1 domain protein, putative	1.11706	1.83185
Afu5g09100	MAP kinase, putative	1.12266	1.10629
Afu3g00560	conserved hypothetical protein	1.12506	1.32443
Afu2g14630	cell wall glycosyl hydrolase family 88 (YteR), putative	1.12902	1.51285
Afu6g13190	H+/nucleoside cotransporter	1.14201	0.902051
Afu3g01450	3-methyl-2-oxobutanoate dehydrogenase, putative	1.16616	1.52046
Afu5g02650	hypothetical protein	1.16946	1.13144
Afu1g11180	heat shock protein/chaperonin HSP78, putative	1.17823	-0.785778
Afu7g05660	elongation factor EF-3, putative	1.17895	1.01116
Afu1g05680	hypothetical protein	1.18318	0.733806
Afu4g08820	conserved hypothetical protein	1.20072	1.16447
Afu5g01920	GPI anchored protein, putative	1.20334	1.72095
Afu6g07470	conserved hypothetical protein	1.20876	2.09447
Afu2g05870	hypothetical protein	1.21186	1.80902
Afu6g07720	phosphoenolpyruvate carboxykinase (ATP)	1.2126	0.67511
Afu4g10770	fatty acid oxygenase PpoA, putative	1.21952	1.35754
Afu2g04200	4-hydroxyphenylpyruvate dioxygenase, putative	1.22202	1.65254
Afu2g04980	tyrosine decarboxylase, putative	1.23266	2.97699
Afu2g02250	allantoinase	1.2462	0.794418
Afu2g02490	hypothetical protein	1.24634	2.16599
Afu4g09330	conserved hypothetical protein	1.27717	1.13359
Afu5g00770	integral membrane protein, putative	1.28189	2.1812
Afu3g00930	C6 transcription factor, putative	1.28397	1.70733
Afu4g01580	ankyrin repeat protein	1.30693	0.724357
Afu5g07960	C2H2 finger and ankyrin domain protein, putative	1.31043	1.82463
Afu2g01870	chitin synthase A	1.31405	2.36047
Afu1g01530	GrpB domain protein	1.31468	2.12255
Afu2g13760	plasma membrane SNARE protein (Sec9), putative	1.31707	2.07254
Afu1g14420	hypothetical protein	1.31977	1.02525
Afu3g02260	hypothetical protein	1.32298	1.94329
Afu5g01930	hypothetical protein	1.33689	0.602216
Afu4g00280	hypothetical protein	1.34013	2.14426
Afu3g02250	conserved hypothetical protein	1.35089	1.06349
Afu3g01050	hypothetical protein	1.35138	2.21351
Afu5g07640	RNA 3'-terminal phosphate cyclase, putative	1.35439	0.845791
Afu5g06060	sulfur metabolism regulator SkpA, putative	1.38317	2.27982
Afu5g13440	hypothetical protein	1.40226	1.25138
Afu4g01470	C6 finger domain protein, putative	1.41225	1.1014
Afu2g00590	glutathione-S-transferase, putative	1.42803	1.5927
Afu1g12840	nitrite reductase	1.43922	-1.24822
Afu8g05010	C2H2 finger domain protein, putative	1.43925	1.35843
Afu3g00870	GNAT family acetyltransferase, putative	1.44139	1.3261
Afu2g00570	GNAT family acetyltransferase, putative	1.44855	1.69828
Afu5g10490	amidase family protein, putative	1.45015	2.28933
Afu6g00290	aminotransferase, putative	1.49142	1.2393
Afu5g01880	conserved hypothetical protein	1.49428	1.62109
Afu4g01260	mitochondrial chaperone ATPase (Bcs1), putative	1.50346	1.5725
Afu2g02500	conserved hypothetical protein	1.50547	1.82798
Afu4g00210	polyketide synthase, putative	1.53363	1.24221
Afu4g12870	methylmalonate-semialdehyde dehydrogenase, putative	1.56625	1.36981
Afu6g03230	cell wall glucanase, putative	1.5907	2.38384
Afu2g09860	purine-cytosine permease	1.60687	1.42106
Afu6g11430	aldehyde dehydrogenase, putative	1.61831	0.580267
Afu1g14830	hypothetical protein	1.61955	1.43998
Afu7g04870	glutamine-serine-proline rich protein, putative	1.62618	1.97814
Afu2g17480	amino acid transporter, putative	1.63753	1.26092
Afu7g05750	AAA family ATPase, putative	1.68155	1.0239
Afu4g08370	conserved hypothetical protein	1.68222	1.73429
Afu2g13060	calcineurin binding protein, putative	1.74063	1.87655
Afu4g14070	glycosyl transferase, putative	1.74295	2.25799
Afu6g00690	conserved hypothetical protein	1.75191	3.47711
Afu5g07360	peroxisomal copper amine oxidase	1.75207	1.11539
Afu3g09620	RNA recognition motif. (a.k.a. RRM, RBD, or RNP domain) protein	1.76152	2.15606
Afu8g01710	antigenic thaumatin domain protein, putative	1.81614	1.26753
Afu3g09690	extracellular thaumatin domain protein, putative	1.89121	1.26066
Afu2g03120	cell wall glucanase (Utr2), putative	1.92908	0.966989
Afu6g03350	acetyltransferase, GNAT family, putative	1.93047	2.23328
Afu6g00430	IgE-binding protein	1.94415	2.70854
Afu2g16520	phospholipase D (PLD), putative	1.96429	3.16162
Afu1g13120	hypothetical protein	1.97447	0.912202
Afu2g10370	Iron-sulfur cluster assembly accessory protein subfamily, putative	1.99469	0.788729
Afu3g14680	lysophospholipase Plb3	2.02057	2.56785
Afu4g00980	hypothetical protein	2.07822	2.61798
Afu2g01750	methionine aminopeptidase, type II, putative	2.07993	3.55003
Afu6g04460	phosphatidyl synthase	2.11647	0.75397
Afu8g05720	DUF567 domain protein	2.16812	2.87626
Afu2g15240	small oligopeptide transporter, OPT family	2.18429	0.615843
Afu4g01370	hypothetical protein	2.28482	-0.81704
Afu2g12630	allergen Asp F13	2.28522	4.45656
Afu2g10520	urate oxydase	2.31952	0.71284
Afu2g13830	conserved hypothetical protein	2.40015	2.61464
Afu2g12780	von Willebrand domain protein	2.40229	3.92771
Afu2g14760	BCS1-like ATPase, putative	2.45796	4.20344
Afu3g13010	conserved hypothetical protein	2.48019	0.732285
Afu6g11530	DUF636 domain protein	2.56455	3.18949
Afu4g01400	ThiJ/PfpI family protein	2.65122	0.63655
Afu6g06470	heat shock protein HSP30, putative	2.65478	1.47066
Afu7g00370	hypothetical protein	2.72401	4.54717
Afu3g00730	conserved hypothetical protein	2.85909	2.67243
Afu7g06680	AAA family ATPase, putative	2.90896	2.9817
Afu3g03290	hypothetical protein	3.16786	3.63683
Afu3g00720	DUF500 and UBA/TS-N domain protein	3.19806	2.08077
Afu5g06820	hypothetical protein	3.52829	2.1126
Afu3g01960	hypothetical protein	3.53019	2.407
Afu3g00550	hypothetical protein	3.53417	4.80814

## Sheet: 3
Locus	Common Name	ΔhacA / WT	ΔireA / WT
Afu4g07650	peptidyl-prolyl cis-trans isomerase (CypB), putative	-1.53594	0.385703
Afu5g08970	oligosaccharyl transferase subunit (beta), putative	-1.44188	0.187545
Afu5g08500	hypothetical protein	-1.26196	-0.450459
Afu2g12260	cytochrome c oxidase assembly protein cox11	-1.22991	-0.53951
Afu1g11470	endosomal cargo receptor (P24), putative	-1.172	0.36322
Afu7g05890	hypothetical protein	-1.14014	-0.512947
Afu5g10930	hypothetical protein	-1.11961	0.141009
Afu4g07390	endosomal cargo receptor (Erp5), putative	-1.09569	0.0559341
Afu2g11080	glucosyltransferase (Die2), putative	-1.094	0.286917
Afu8g01310	metalloreductase, putative	-1.08643	-0.279808
Afu3g00350	hypothetical protein	-1.08623	-0.497035
Afu6g04380	molecular chaperone (ABC1), putative	-1.06768	-0.373914
Afu4g08320	tyrosyl-tRNA synthetase, mitochondrial precursor (tyrosine--tRNA ligase) (tyrrs)	-1.05179	-0.512093
Afu1g15490	MFS multidrug transporter, putative	-1.04375	-0.552388
Afu5g03500	alpha glucosidase II, alpha subunit, putative	-1.04133	0.0254603
Afu4g08720	lysophospholipase	-1.01795	0.551329
Afu3g00340	glycosyl hydrolase, putative	-1.01125	0.00577701
Afu6g13390	conserved hypothetical protein	-1.00962	-0.316487
Afu3g09870	hypothetical protein	-0.999589	-0.233784
Afu2g07680	L-ornithine N5-oxygenase SidA	-0.98083	0.438239
Afu6g06610	DnaJ domain protein	-0.976714	0.370571
Afu8g00930	chitosanase, putative	-0.969349	-0.400476
Afu8g04430	oligosaccharyl transferase subunit (Stt3), putative	-0.96931	-0.276714
Afu1g05120	integral membrane protein, putative	-0.956569	-0.143901
Afu4g11580	Mn superoxide dismutase (SodB), putative	-0.94288	-0.150578
Afu4g14630	FAD binding domain protein	-0.932818	-0.574216
Afu6g10990	NADPH cytochrome P450 reductase (CprA), putative	-0.922738	-0.0968606
Afu5g03260	endosomal cargo receptor (Erp3), putative	-0.886884	0.38118
Afu1g04130	FG-GAP repeat protein, putative	-0.882834	-0.390085
Afu1g10040	HMG box protein, putative	-0.872431	-0.0807453
Afu3g09390	AMMECR1	-0.869613	-0.299282
Afu7g03740	14-alpha sterol demethylase Cyp51B	-0.867278	-0.508183
Afu4g06820	related to sporulation-specific gene SPS2, putative	-0.864685	0.283763
Afu2g10510	ribosomal protein L13	-0.861048	0.110219
Afu2g13110	cytochrome c	-0.852484	-0.385748
Afu4g14850	extracellular 3-ketosteroid 1-dehydrogenase, putative	-0.851139	-0.507541
Afu6g14360	cytochrome P450, putative	-0.84905	-0.498628
Afu3g05500	nuclear envelope pore membrane protein, putative	-0.845268	-0.228774
Afu8g05310	DUF962 domain protein	-0.83285	0.44438
Afu8g06050	salicylate hydroxylase, putative	-0.82334	0.231193
Afu2g03110	alkaline phosphatase	-0.820171	0.571396
Afu2g08290	conserved hypothetical protein	-0.819794	-0.395195
Afu6g12760	GPI transamidase component (GAA1), putative	-0.817998	0.306915
Afu5g03510	PQ loop repeat protein	-0.814186	-0.405607
Afu2g03010	cytochrome c subunit Vb, putative	-0.808869	-0.135131
Afu7g04190	cyclopropane-fatty-acyl-phospholipid synthase, putative	-0.801216	-0.508776
Afu2g16570	short chain dehydrogenase/reductase, putative	-0.793868	0.0766246
Afu3g12420	endothelin-converting enzyme	-0.792895	0.300256
Afu6g08590	protein kinase, putative	-0.787752	-0.111601
Afu5g12840	hydroxyacylglutathione hydrolase, putative	-0.786492	-0.183174
Afu7g02030	cytochrome c oxidase assembly protein (Pet117), putative	-0.776007	0.200383
Afu5g11040	pantoate--beta-alanine ligase	-0.774708	-0.52003
Afu1g04970	Patatin-like serine hydrolase, putative	-0.772068	-0.534188
Afu3g09570	conserved hypothetical protein	-0.771381	-0.567742
Afu1g06590	phosphoglycerate mutase family protein, putative	-0.770965	-0.286419
Afu8g06770	conserved hypothetical protein	-0.75553	-0.407119
Afu6g02430	hypothetical protein	-0.75504	-0.397998
Afu1g04400	37S ribosomal protein Mrp10, mitochondrial	-0.754806	-0.136604
Afu7g04390	hypothetical protein	-0.754344	-0.0733709
Afu2g11230	nuclear pore protein (SEH1), putative	-0.753037	0.0293181
Afu1g12150	nucleoside diphosphatase Gda1	-0.742904	0.0296387
Afu7g01540	endo-1,4-beta-glucanase	-0.740599	-0.519726
Afu1g12040	chitin biosynthesis protein (Chs7), putative	-0.734071	0.293722
Afu5g14980	conserved hypothetical protein	-0.732402	0.209385
Afu4g08100	hypothetical protein	-0.72602	-0.379794
Afu2g01630	MSF1 domain protein	-0.725184	0.258101
Afu4g06000	ribosomal protein L3 [imported]	-0.720376	-0.215756
Afu2g18080	LINE-1 class reverse transcriptase, RNaseH, putative	-0.71774	0.0942436
Afu6g07700	hypothetical protein	-0.715188	-0.224665
Afu5g00310	flavin-containing monooxygenase, putative	-0.70584	-0.112047
Afu6g04290	phosphoethanolamine N-methyltransferase, putative	-0.705165	-0.548083
Afu7g01710	cholinesterase, putative	-0.702869	-0.157061
Afu2g11920	hypothetical protein	-0.701954	0.0569458
Afu6g08490	inorganic diphosphatase, putative	-0.699405	-0.199222
Afu2g03940	hypothetical protein	-0.699082	0.26097
Afu1g12160	possible translation initiation factor	-0.693288	-0.00185336
Afu1g04470	mitochondrial intermembrane space translocase subunit Tim10, putative	-0.684427	-0.0653008
Afu6g03710	amidohydrolase, putative	-0.682171	-0.43777
Afu3g08870	conserved hypothetical protein	-0.680013	-0.13659
Afu6g02140	peptidyl prolyl cis-trans isomerase (CypC), putative	-0.676913	0.163864
Afu2g09350	endo-beta-1,6-glucanase, putative	-0.676715	-0.342192
Afu3g07870	extracellular serine-rich protein	-0.674932	-0.389112
Afu8g04500	mannosyltransferase PMTI	-0.674313	-0.308715
Afu6g02960	NADH-ubiquinone oxidoreductase 105 kDa subunit	-0.669644	-0.126117
Afu3g10740	RAB GTPase Ypt51, putative	-0.669206	0.025511
Afu8g07030	endo-1,4-beta-mannosidase, putative	-0.669085	-0.0174531
Afu6g10030	PAP2 domain protein	-0.667045	0.514367
Afu4g11230	conserved hypothetical protein	-0.666911	0.268108
Afu6g03130	hypothetical protein	-0.666275	-0.554294
Afu4g01130	dienelactone hydrolase family protein	-0.664999	0.298309
Afu3g05400	DnaJ and TPR domain protein	-0.664183	0.136295
Afu1g09360	DUF1242 domain protein, putative	-0.662182	0.402461
Afu6g09110	MSF multidrug transporter (Fnx1), putative	-0.659907	-0.372279
Afu3g14920	LaeA-like methyltransferase, putative	-0.65962	-0.566925
Afu5g12000	hypothetical protein	-0.65855	-0.12956
Afu8g06540	ornithine decarboxylase, putative	-0.657858	-0.195246
Afu2g00790	hypothetical protein	-0.657385	-0.237899
Afu3g09830	conserved hypothetical protein	-0.655164	-0.0580009
Afu4g06740	dihydrofolate synthetase [imported]	-0.653556	-0.263441
Afu4g13140	hypothetical protein	-0.653214	0.00852522
Afu3g09260	hypothetical protein	-0.652683	-0.153543
Afu2g00750	oxidoreductase, 2OG-Fe(II) oxygenase family, putative	-0.650257	-0.478514
Afu8g02780	vacuolar protein sorting protein, putative	-0.649159	-0.485833
Afu4g13190	endosomal cargo receptor (Erv25), putative	-0.648291	0.177133
Afu4g10740	mitochondrial large ribosomal subunit L24, putative	-0.64824	-0.262256
Afu2g16970	mitochondrial large ribosomal subunit L30, putative	-0.646614	0.264812
Afu3g09950	Phospholipid:diacylglycerol acyltransferase, putative	-0.645111	-0.0403294
Afu5g02740	alpha-1,2-mannosyltransferase (Ktr4), putative	-0.645093	-0.220329
Afu6g09470	reverse transcriptase, RNaseH, putative	-0.642554	-0.215241
Afu2g12570	hypothetical protein	-0.642336	-0.290902
Afu8g04310	conserved hypothetical protein	-0.642017	-0.5098
Afu6g07280	ABC transporter (Adp1), putative	-0.641737	0.259167
Afu1g12110	NADH:ubiquinone oxidoreductase (NADH dehydrogenase),14 kDa	-0.64054	-0.00703997
Afu5g15000	arsenate reductase (ArsC), putative	-0.639261	-0.121549
Afu4g14420	secreted glycosyl hydrolase, putative	-0.63794	-0.389472
Afu5g03230	stress response RCI peptide, putative	-0.637903	-0.180374
Afu1g03020	My026 protein	-0.631626	0.154139
Afu6g01810	cytochrome P450, putative	-0.628837	-0.433061
Afu2g11260	3-isopropylmalate dehydratase, putative	-0.626926	0.447859
Afu4g08110	translation elongation factor G1, putative	-0.625027	-0.496959
Afu5g15010	arsenite permease (ArsB), putative	-0.6217	-0.270234
Afu2g00410	amidase family protein	-0.619295	0.325766
Afu8g04290	C2H2 finger domain protein, putative	-0.617788	-0.462469
Afu8g06230	hypothetical protein	-0.617081	-0.0562582
Afu3g03430	ABC multidrug transporter SitT, putative	-0.616514	-0.136607
Afu5g13330	hypothetical protein	-0.615623	-0.510027
Afu2g12540	hypothetical protein	-0.615017	-0.325281
Afu2g02120	phosphoglucomutase, putative	-0.605505	-0.250499
Afu1g15400	peroxisome biogenesis factor, putative	-0.603806	-0.305
Afu6g00330	hypothetical protein	-0.603802	-0.265877
Afu2g05150	cell wall galactomannoprotein Mp2	-0.603121	0.00357298
Afu6g11980	exo-beta-1,3-glucanase, putative	-0.602001	0.0714949
Afu2g13000	hypothetical protein	-0.599963	-0.466444
Afu1g13000	conserved hypothetical protein	-0.597001	0.00581898
Afu2g08890	dihydrofolate reductase	-0.595844	-0.0217925
Afu3g08690	hypothetical protein	-0.595509	-0.400065
Afu2g00800	pectate lyase, putative	-0.594918	0.158913
Afu7g07100	Pfs, NACHT and WD domain protein	-0.594403	-0.29819
Afu1g04220	hypothetical protein	-0.5926	-0.150522
Afu1g02580	lipase, putative	-0.589767	0.115808
Afu2g14970	Gamma-butyrobetaine hydroxylase subfamily, putative	-0.589314	-0.35379
Afu3g10800	eukaryotic translation initiation factor 3 subunit CLU1/TIF31, putative	-0.588594	-0.380531
Afu2g08300	DnaJ domain protein, putative	-0.585572	0.249439
Afu7g00990	integral membrane protein	-0.584996	-0.0310442
Afu6g02260	hypothetical protein	-0.584348	-0.557647
Afu6g00110	dihydrodipicolinate synthetase family protein	-0.584117	-0.145503
Afu1g01290	cytochrome P450 monooxygenase, putative	-0.582492	-0.0321789
Afu1g03660	acid phosphatase, putative	-0.580041	-0.380258
Afu2g03950	serine/threonine protein phosphatase, putative	0.580307
Afu3g10660	hydroxymethylglutaryl-CoA synthase	0.581234	0.0846834
Afu7g03880	sodium/calcium exchanger protein	0.581599	0.573329
Afu6g08580	FKBP-type peptidyl-prolyl isomerase, putative	0.582001	0.161695
Afu4g12010	2-oxo acid dehydrogenases acyltransferase, putative	0.582006	0.171892
Afu3g01090	hypothetical protein	0.58202	0.0740191
Afu8g04790	ribosome biogenesis protein, putative	0.583408	0.0172871
Afu5g02410	DEAD/DEAH box helicase, putative	0.585323	0.175962
Afu1g15350	homoserine acetyltransferase family protein	0.585465	0.276202
Afu1g05050	cytosine deaminase, putative	0.585807	0.227064
Afu6g01970	GATA transcriptional activator AreA	0.587281	0.195679
Afu6g13590	3-isopropylmalate dehydrogenase	0.591939	-0.367529
Afu3g03140	HET domain protein	0.592531	0.191177
Afu2g17100	conserved hypothetical protein	0.592809	0.490273
Afu3g09340	PDCD2_C domain protein, putative	0.594331	-0.0476122
Afu4g08120	protease inhibitor (Tfs1), putative	0.594837	0.578091
Afu7g02050	hypothetical protein	0.595085	0.0155581
Afu8g05430	hypothetical protein	0.595674	0.366974
Afu1g02970	salicylate hydroxylase, putative	0.597616
Afu5g08950	RAS small monomeric GTPase (Rsr1), putative	0.598813	0.522695
Afu2g13480	conserved hypothetical protein	0.59909	-0.344898
Afu4g11080	acetyl-coenzyme a synthetase	0.600139	-0.198848
Afu6g10240	sensor histidine kinase/response regulator Fos-1	0.60552	-0.194371
Afu7g02230	mRNA binding post-transcriptional regulator (Csx1), putative	0.606646	0.443019
Afu4g13530	Trehalase	0.608055	-0.216598
Afu4g09070	ATP binding L-PSP endoribonuclease family protein, putative	0.608253	-0.271019
Afu5g09320	signal transduction protein (Syg1), putative	0.608454
Afu1g10370	MSF drug transporter, putative	0.609274	-0.228475
Afu1g05560	GTP binding protein, putative	0.609853
Afu3g13380	ribose-phosphate pyrophosphokinase	0.610217	0.229266
Afu2g12120	hypothetical protein	0.612578	0.541084
Afu1g06400	cAMP-dependent protein kinase-like, putative	0.613372	-0.525065
Afu5g08940	3-methylcrotonyl-CoA carboxylase, beta subunit (MccB), putative	0.614628	0.175494
Afu5g11430	quinone oxidoreductase, putative	0.614701	0.442415
Afu8g05710	MFS sugar transporter Stl1, putative	0.615978	-0.242448
Afu3g12250	protein-tyrosine phosphatase, putative	0.617889	0.355246
Afu1g04760	conserved hypothetical protein	0.618039	-0.490737
Afu6g03250	protein kinase, putative	0.622546	-0.169389
Afu1g13510	C6 transcription factor (FacB), putative	0.625023	0.0422418
Afu3g10040	conserved hypothetical protein	0.626111	0.327968
Afu3g05450	glutamate carboxypeptidase, putative	0.629812	0.476405
Afu3g05330	R3H and G-patch domain protein, putative	0.629839	0.436117
Afu5g06170	conserved hypothetical protein	0.630712	0.454515
Afu3g12150	flavin containing amine oxidase, putative	0.631259	0.166181
Afu8g05100	hypothetical protein	0.632018	0.229295
Afu7g05260	transformer-SR ribonucleoprotein	0.633445	0.46459
Afu7g00950	MFS monosaccharide transporter, putative	0.634289	-0.371905
Afu1g06190	hnrnp arginine n-methyltransferase	0.635693	0.291426
Afu3g14560	MFS transporter, putative	0.636009
Afu1g04370	preribosome assembly and transport protein SRP40, putative	0.636467
Afu1g05170	related to monocarboxylate transporter	0.636483	-0.444094
Afu2g11510	nucleolar GTP-binding protein (Nog1), putative	0.636916	0.360649
Afu1g02630	periodic tryptophan protein (Pwp1), putative	0.637159	0.368767
Afu1g16290	ATP dependent RNA helicase (Rok1), putative	0.637513	-0.374601
Afu3g05780	GATA transcription factor (LreA), putative	0.638744	-0.0119876
Afu4g08600	aldehyde dehydrogenase, putative	0.639324	-0.144401
Afu5g12180	Ran/spi1 binding protein	0.639847	-0.198943
Afu2g11810	conserved hypothetical protein	0.642094	0.188674
Afu5g05710	pseudouridylate synthase family protein	0.643407	0.146323
Afu3g07680	ran GTPase activating protein 1 (RNA1 protein)	0.647702	0.341974
Afu6g08050	6-phosphogluconate dehydrogenase, decarboxylating	0.647884	0.02891
Afu5g07210	homoserine O-acetyltransferase, putative	0.6503	0.138838
Afu1g00580	NDT80_PhoG domain protein PcaG	0.650312	0.0599684
Afu4g05900	conserved hypothetical protein	0.651781	0.549263
Afu1g13800	mfs-multidrug-resistance transporter	0.653897	-0.407046
Afu8g05270	C6 transcription factor, putative	0.656105	0.326527
Afu2g15940	cofactor for methionyl- and glutamyl-tRNA synthetases, putative	0.657272	0.117993
Afu7g05210	CTP synthase	0.659896	0.140385
Afu5g06780	carbamoyl-phosphate synthase, small subunit	0.662148	-0.200406
Afu6g11070	DEAD box RNA helicase (Hca4), putative	0.665268	-0.111097
Afu3g00950	ankyrin repeat protein	0.66528
Afu3g01630	RTA1 domain protein, putative	0.669897	-0.00177991
Afu5g02300	peroxidase, putative	0.669903	0.234793
Afu3g01110	GMP synthase	0.674532	0.440216
Afu3g08960	epoxide hydrolase	0.675202	0.471104
Afu5g12240	oxidoreductase, 2OG-Fe(II) oxygenase family, putative	0.675452	0.52017
Afu6g00280	isoflavone reductase family protein	0.680192	0.206091
Afu2g12880	DUF663 domain protein	0.682789	0.386279
Afu8g04510	pirin, putative	0.684711	0.492854
Afu3g08050	C6 transcription factor (OTam), putative	0.685987	-0.0973859
Afu5g09850	tRNA exportin, putative	0.690478	0.0864908
Afu6g13600	TPR repeat protein	0.6905	0.0531669
Afu3g08750	conserved hypothetical protein	0.692039	-0.000707
Afu5g03620	endonuclease/transposase	0.695484	0.128673
Afu3g12490	protein arginine methyltransferase 3	0.695763	0.425833
Afu3g12790	conserved glutamic acid-rich protein	0.696209	-0.368405
Afu6g11400	F-box and WD domain protein	0.700833	0.563005
Afu5g00650	hypothetical protein	0.710575	0.229026
Afu6g12440	conserved hypothetical protein	0.714286	0.488128
Afu1g12540	TMEM1 family protein, putative	0.715716	-0.18508
Afu8g05280	QDE2 protein	0.717662	0.026544
Afu3g14410	conserved hypothetical protein	0.720522	0.291258
Afu3g14070	NA	0.721214	-0.0268437
Afu6g09200	conserved hypothetical protein	0.722173	0.482674
Afu4g08810	DUF757 domain protein	0.723955	0.432055
Afu5g02720	phosphoribosylformylglycinamidine synthase	0.724509	-0.00994305
Afu6g04230	RING finger protein	0.730614	0.355928
Afu6g04800	lysine decarboxylase-like protein	0.733917	0.212438
Afu5g11600	CRO1 protein	0.734175	0.35851
Afu5g08330	RNA binding protein	0.738811
Afu3g00510	GPI anchored cell wall protein, putative	0.739888	-0.365671
Afu3g03230	hypothetical protein	0.740098	0.484113
Afu1g06690	RLI and DUF367 domain protein	0.740985	0.300655
Afu2g13540	CCCH zinc finger and RRM domain protein	0.741364	0.489598
Afu3g05820	Zinc finger, ZZ type domain protein	0.745668	0.542678
Afu1g17070	FYVE domain protein, putative	0.749202	0.101993
Afu5g11840	protein kinase, putative	0.754034	0.276897
Afu6g04570	elongation factor 1-gamma 2	0.754354	-0.0342929
Afu6g08760	proline oxidase	0.756591	0.17571
Afu3g08160	eukaryotic translation initiation factor eIF4A, putative	0.76465	0.392643
Afu1g10560	GTP binding protein, putative	0.765393	0.218188
Afu1g06390	translation elongation factor EF-1 alpha subunit , putative	0.766533	0.521875
Afu6g08720	5'-methylthioadenosine phosphorylase	0.769413	-0.325219
Afu4g06020	cyclin dependent kinase inhibitor (Nuc-2), putative	0.770597	0.382971
Afu3g03360	hypothetical protein	0.778808	-0.251476
Afu4g06490	DNA mismatch repair protein (Mlh3), putative	0.779769	0.135719
Afu1g16500	small monomeric GTPase (Gtr2), putative	0.782527	0.331053
Afu4g13880	ankyrin repeat protein	0.783714	-0.360628
Afu7g05460	conserved hypothetical protein	0.78851	0.232033
Afu5g03010	conserved hypothetical protein	0.79597	0.461167
Afu4g08910	hypothetical protein	0.799448	0.427475
Afu3g00960	conserved hypothetical protein	0.800827	0.312063
Afu3g13940	DUF1212 domain membrane protein	0.808147	0.0703084
Afu3g11990	C6 transcription factor (Mut3), putative	0.810481	0.442543
Afu4g09890	conserved hypothetical protein	0.810525	0.499865
Afu3g12460	conserved hypothetical protein	0.813633	-0.322812
Afu5g13840	NUDIX domain, putative	0.81587	0.266116
Afu2g13800	malate dehydrogenase	0.819772	0.172733
Afu4g08760	phospho-2-dehydro-3-deoxyheptonate aldolase, class II	0.825083	0.52941
Afu3g13160	hypothetical protein	0.828216
Afu5g12230	MYND domain protein (SamB), putative	0.832843	0.379864
Afu1g03800	C6 transcription factor, putative	0.838524	-0.181637
Afu4g10200	transcription factor RfeF, putative	0.844703	0.255264
Afu4g14040	Hsp70 family protein	0.848712	0.0256933
Afu5g06010	translation initiation factor eIF-6, putative	0.848738	0.264131
Afu1g04150	tartrate dehydrogenase	0.848988
Afu6g04050	D123 proteins, putative	0.860273	0.39805
Afu1g15200	Hsp70 family protein	0.864021	0.376727
Afu1g07000	DNA repair protein Rad26, putative	0.869936	-0.165418
Afu1g06480	hypothetical protein	0.875843	-0.1853
Afu5g13120	conserved hypothetical protein	0.879617	0.323413
Afu5g01350	major facilitator superfamily	0.88006	0.240236
Afu1g15610	oxidoreductase, zinc-binding dehydrogenase family, putative	0.88061	0.396793
Afu2g16200	uracil phosphoribosyltransferase	0.886338	0.501483
Afu1g15000	2-isopropylmalate synthase	0.886921	0.452062
Afu7g02010	hypothetical protein	0.887526	0.506094
Afu5g11110	thiamin pyrophosphokinase-related protein	0.895801	-0.0336303
Afu1g02110	phospho-2-dehydro-3-deoxyheptonate aldolase	0.9052	0.374857
Afu3g12690	conserved hypothetical protein	0.909615	-0.214719
Afu1g04870	urea transporter (Dur3), putative	0.915863	-0.318582
Afu3g10760	phosphoketolase, putative	0.92091	-0.322546
Afu4g13860	extracellular salicylate hydroxylase/monooxygenase, putative	0.928416	-0.00683658
Afu6g13220	hypothetical protein	0.928729	0.0772928
Afu4g13120	glutamine synthetase	0.928792	-0.215506
Afu4g14000	tripeptidyl peptidase A	0.931928	-0.202512
Afu3g12630	cytochrome b561, putative	0.936892	-0.301535
Afu1g13450	vegetative cell wall protein gp1	0.939809	0.135814
Afu1g07440	molecular chaperone Hsp70	0.948435	0.309011
Afu1g14500	conserved hypothetical protein	0.949102	0.408662
Afu5g10640	tyrosyl-tRNA synthetase	0.959152	0.278916
Afu6g08860	sugar isomerase, KpsF/GutQ	0.961982	0.255671
Afu4g08990	molybdenum cofactor sulfurase protein (HxB), putative	0.964367	0.174333
Afu1g04440	PrnX protein	0.968172	0.242749
Afu8g03930	Hsp70 chaperone (HscA), putative	0.968578	0.319673
Afu7g04800	hypothetical protein	0.981923	0.360483
Afu1g02780	L-asparaginase	0.983235
Afu2g05060	alternative oxidase	0.990413	0.5076
Afu5g14140	hypothetical protein	1.01792	-0.154185
Afu3g02420	ThiJ/PfpI family transcriptional regulator, putative	1.03921
Afu7g05910	purine permease, putative	1.0542	-0.306373
Afu5g11100	DUF775 domain protein	1.05766
Afu6g09990	importin beta-4 subunit, putative	1.06092	0.367993
Afu1g13050	C2H2 transcription factor, putative	1.0631	0.551501
Afu1g13210	uracil permease	1.06465	0.360789
Afu5g06660	UPF0187 domain membrane protein	1.07756	-0.270487
Afu3g13810	integral membrane protein, putative	1.08615	0.359257
Afu6g10470	zinc finger protein ZPR1	1.09842	-0.17624
Afu1g06700	metacaspase CasA	1.09938	0.466298
Afu7g04710	NF-X1 finger transcription factor, putative	1.10233	-0.127603
Afu2g10750	RNA helicase (Dbp), putative	1.11553	0.26385
Afu1g15850	C6 transcription factor, putative	1.12168	0.358034
Afu1g04750	cyclin	1.14832	-0.545269
Afu2g09150	adenosine deaminase	1.17384	0.3281
Afu5g07020	ABC transporter, putative	1.19477	0.563497
Afu7g06540	threonine aldolase, putative	1.19598	-0.0578779
Afu3g03280	FAD binding monooxygenase, putative	1.19818	0.112129
Afu1g02600	hypothetical protein	1.19869	0.229165
Afu1g00420	carboxypeptidase S1, putative	1.23533	0.501865
Afu6g03060	monosaccharide transporter	1.25646	0.2954
Afu5g12580	GTP binding protein (GTPBP1), putative	1.26206	0.307082
Afu6g03930	hypothetical protein	1.2697
Afu6g11850	hypothetical protein	1.27916	-0.0947176
Afu4g12940	hypothetical protein	1.29655	-0.0819932
Afu3g03350	nonribosomal peptide synthase, putative	1.35268	0.313866
Afu1g00410	C6 transcription factor, putative	1.37217	0.0936348
Afu6g13180	CECR1 family adenosine deaminase, putative	1.41979	0.187462
Afu4g10110	homeobox transcription factor, putative	1.42985	0.447679
Afu2g01410	aldo-keto reductase, putative	1.43263	0.543204
Afu1g12830	nitrate reductase NiaD	1.51899	-0.568223
Afu3g00680	copper amine oxidase	1.51907	0.219767
Afu2g17300	glutathione S-transferase	1.55018
Afu4g11220	xanthine dehydrogenase	1.68383	-0.0333798
Afu6g04360	ABC drug exporter AtrF	1.76457
Afu5g02020	aldehyde reductase (GliO), putative	1.83285
Afu4g01380	4-nitrophenylphosphatase, putative	1.8516	0.294653
Afu6g13090	hypothetical protein	1.91563	0.497995
Afu3g08580	glycine-rich RNA-binding protein, putative	1.95557	0.529405
Afu7g04180	amine oxidase	1.97275	0.137266
Afu8g02430	zinc-binding alcohol dehydrogenase, putative	2.00478	0.247061
Afu7g04290	amino acid permease (Gap1), putative	2.15406
Afu4g01420	hypothetical protein	2.23013	-0.151048
Afu1g10930	ammonium transporter	2.63442	-0.438173
Afu4g01450	phospho-2-dehydro-3-deoxyheptonate aldolase	3.07048	0.0138438
Afu4g01360	MFS transporter of unkown specificity	3.80894	-0.101321
Afu4g01460	hypothetical protein	4.17153	0.211846
Afu4g01440	glutathione S-transferase family protein	5.55111	0.227273

## Sheet: 4
Locus	Common Name	WT+DTT / WT	ΔhacA+DTT / WT+DTT	ΔireA+DTT / WT+DTT	WT+Tm / WT	ΔhacA+Tm / WT+Tm	ΔireA+Tm / WT+Tm
Afu7g05490	hypothetical protein	2.65624	0.0173352	0.566743	0.28141	-0.630345	0.535787
Afu4g07360	5-methyltetrahydropteroyltriglutamate--homocysteine S-methyltransferase	1.89144	-0.271848	-1.36816	0.242301	-0.669347	-0.744626
Afu1g10130	adenosylhomocysteinase	1.60149	-0.46023	-1.21376	0.109521	-0.321883	-0.662274
Afu2g14760	BCS1-like ATPase, putative	1.3799	0.285643	3.3173	0.318517	2.43338	4.42863
Afu2g12180	lectin family integral membrane protein, putative	1.34716	-2.27799	-1.21537	0.439227	-1.1498	-0.738224
Afu2g02360	UDP-glucose:glycoprotein glucosyltransferase, putative	1.32271	-2.63596	-0.402577	0.28873	-1.09323	0.413702
Afu4g10440	conserved hypothetical protein	1.31364	-2.3781	-0.378205	0.578247	-1.50654	0.133783
Afu8g05720	DUF567 domain protein	1.27794	0.211188	2.21942	0.222442	1.62837	2.59543
Afu5g00730	H /K ATPase alpha subunit, putative	1.26365	-0.97719	3.19968	0.0802447	-0.579058	3.4728
Afu2g16120	translocon-associated protein, alpha subunit, putative	1.25733	-2.22402	-0.371549	0.499828	-1.31498	0.0338048
Afu3g06900	hypothetical protein	1.24897	-1.85282	-1.34114	0.49951	-1.32806	-1.23189
Afu5g09250	transcription factor (Snd1/p100), putative	1.23903	-1.43755	-1.13746	0.439111	-0.877766	-1.12786
Afu7g05500	theta class glutathione S-transferase	1.21754	0.27325	-0.276537	0.151818	-0.329726	-0.759957
Afu5g06060	sulfur metabolism regulator SkpA, putative	1.20243	-0.256319	1.54318	0.418363	1.35879	1.92475
Afu8g04380	conserved hypothetical protein	1.16998	-1.19175	-0.965951	0.0750608	-0.279308	-0.256503
Afu7g00340	metallo-beta-lactamase domain protein, putative	1.15211	-0.264998	-0.632324	0.163103	-0.0612926	-0.585254
Afu8g02120	conserved hypothetical protein	1.11688	-0.593835	0.725518	0.134214	0.371216	1.09461
Afu6g12780	conserved hypothetical protein	1.11297	-1.25416	0.000977	0.259394	-0.119082	0.405729
Afu6g10290	receptor L domain protein	1.11031	-1.2431	0.590491	-0.107452	0.421148	1.4243
Afu1g10630	S-adenosylmethionine synthetase	1.09878	-0.357214	-1.88731	-0.157257	-0.875917	-1.63786
Afu4g06670	allergen Asp F7	1.05774	-0.18905	0.890457	0.0035325	0.442169	1.20457
Afu2g16520	phospholipase D (PLD), putative	1.04929	-0.170361	2.30925	0.135284	1.90329	3.08725
Afu1g14940	protein translocation complex componenet (Npl1), putative	1.03725	-1.75093	-1.16573	0.441305	-0.667205	-0.63902
Afu3g00560	conserved hypothetical protein	1.02116	-0.1695	0.219847	0.531163	0.815785	0.722322
Afu4g01260	mitochondrial chaperone ATPase (Bcs1), putative	1.01599	-0.44711	0.428017	0.0304233	0.836979	1.45432
Afu2g12780	von Willebrand domain protein	1.00263	0.242429	2.93294	0.0791267	2.63728	3.32998
Afu1g10030	hypothetical protein	0.992474	-0.592358	0.645983	0.195752	0.393867	1.2284
Afu3g07910	UDP-glucose 4-epimerase, putative	0.991986	0.437642	-0.0932011	0.352003	-0.0829499	0.0390949
Afu6g08390	conserved hypothetical protein	0.987083	0.23361	0.79607	0.202683	0.197496	0.759266
Afu2g11300	G2882	0.98336	-0.607134	-0.465741	0.0340964	-0.196022	-0.468526
Afu2g12580	translocation protein sec62	0.972262	-2.01227	-0.261705	0.347294	-0.726434	-0.115175
Afu3g14400	hypothetical protein	0.969925	-0.255042	1.80415	-0.112058	0.33295	2.08455
Afu3g08560	Cation transport protein chaC, putative	0.968676	-1.03149	-0.409695	0.458998	-0.0819571	-0.155852
Afu6g03350	acetyltransferase, GNAT family, putative	0.968131	1.89541	1.12568	-0.0535054	1.8101	2.02738
Afu1g04910	hypothetical protein	0.964821	-1.25692	-0.368997	0.46408	-0.431552	-0.323904
Afu3g14920	LaeA-like methyltransferase, putative	0.960939	-1.86784	-1.28596	0.449845	-1.10309	-1.09841
Afu1g01350	conserved hypothetical protein	0.924252	-1.3153	-0.746047	0.289298	-0.482515	-0.37999
Afu4g08660	oligosaccharyltransferase subunit ribophorin II, putative	0.919408	-1.93329	-0.513548	0.515204	-0.457645	-0.249329
Afu2g06100	DUF907 domain protein	0.918764	-0.641353	0.843893	0.359756	-0.39103	0.895791
Afu2g12410	conserved hypothetical protein	0.916051	-1.50622	-1.12568	0.461339	-0.572336	-0.993766
Afu6g06620	YIP3-like protein	0.910442	-1.25503	0.313691	0.429804	-0.135961	0.554087
Afu4g09080	C2H2 transcription factor (Seb1), putative, putative	0.894995	0.0985401	-0.0648034	0.370478	0.134312	0.167814
Afu3g08840	coatomer alpha subunit, putative	0.877968	-1.4427	-1.26791	0.256107	-0.509036	-0.802811
Afu1g04860	hypothetical protein	0.872488	-0.00583097	0.745066	0.0854942	0.533111	0.744608
Afu7g01830	Ugp1	0.868698	-0.741634	-0.491539	0.463405	-0.391482	-0.448077
Afu3g02260	hypothetical protein	0.866322	0.775993	1.39803	-0.0397892	1.25286	2.17339
Afu6g03230	cell wall glucanase, putative	0.859805	-0.84973	1.39081	-0.186334	1.30994	1.72091
Afu1g12040	chitin biosynthesis protein (Chs7), putative	0.856609	-1.55936	-0.454248	0.214449	-0.821708	-0.0707349
Afu6g07470	conserved hypothetical protein	0.856278	-0.447384	1.37049	0.396373	0.875911	1.47543
Afu6g03960	conserved hypothetical protein	0.84758	-0.760543	-0.59495	0.137353	-0.102965	-0.369466
Afu8g05340	conserved hypothetical protein	0.847104	-1.62562	-0.974952	0.536523	-0.671862	-0.877842
Afu3g14320	Golgi transport protein Sly1, putative	0.841292	-1.23101	-0.500581	0.291181	-0.271154	-0.309934
Afu6g09200	conserved hypothetical protein	0.834835	0.830035	0.0282422	0.0979853	0.768554	0.716339
Afu3g06450	protein mannosyltransferase 1	0.834593	-1.76363	-0.784687	0.372307	-1.04106	-0.559854
Afu3g14420	chitin synthase G	0.812282	-0.632574	0.556397	0.532669	-0.0596113	0.780337
Afu3g07890	endo alpha-1,4 polygalactosaminidase, putative	0.810545	-1.10227	0.932477	0.0602371	-0.314154	1.4768
Afu1g11470	endosomal cargo receptor (P24), putative	0.805386	-1.54923	-0.292428	0.21268	-1.54336	-0.013857
Afu1g15830	hypothetical protein	0.79494	-0.173355	0.105788	-0.101566	0.108901	0.448102
Afu2g04980	tyrosine decarboxylase, putative	0.793551	-0.0419226	2.21865	0.0286005	1.31789	2.84723
Afu3g08010	C2H2 transcription factor (Ace1), putative	0.792214	0.034068	1.03038	0.070262	1.05229	1.2381
Afu7g05010	glyoxalase family protein	0.791541	0.0290206	-0.0673706	0.0194032	0.187375	0.435567
Afu2g13760	plasma membrane SNARE protein (Sec9), putative	0.790939	-0.298113	1.63954	-0.0837485	0.87751	2.2799
Afu2g11240	UDP-N-acetylglucosamine-dolichyl-phosphate N-acetylglucosaminephosphate transferase, putative	0.783832	-2.09018	-0.53255	0.524187	-0.435929	-0.255868
Afu3g10600	clathrin-coated vesicle protein, putative	0.782543	-1.31366	0.821832	0.397986	0.0984331	0.871692
Afu4g08670	hypothetical protein	0.779345	-1.03122	-1.01336	0.3982	-0.804594	-0.96817
Afu6g14120	hypothetical protein	0.777605	-0.0413193	0.826227	0.291264	1.06033	0.940149
Afu1g10580	homeobox transcription factor, putative	0.770231	-0.381466	-0.353572	0.270965	-0.0142266	-0.185364
Afu6g06700	hypothetical protein	0.768165	-1.55035	-0.807765	0.367824	-0.451463	-0.545612
Afu4g07330	ER associated DnaJ chaperone (Hlj1), putative	0.764949	-0.934353	-0.69624	0.534818	-0.0787867	-0.438943
Afu2g01750	methionine aminopeptidase, type II, putative	0.764892	1.15565	2.84878	-0.0483557	1.74342	3.487
Afu4g06990	Transmembrane amino acid transporter protein superfamily	0.75902	-0.830775	-0.675716	0.44542	-0.699216	-0.687754
Afu2g17810	RTA1 domain protein, putative	0.757186	-0.733084	1.63692	0.0733545	0.305777	1.52206
Afu5g01840	conserved hypothetical protein	0.75539	-0.242964	1.29172	-0.046767	0.78646	1.37373
Afu5g03260	endosomal cargo receptor (Erp3), putative	0.752794	-2.18564	-0.394186	0.40627	-0.945663	-0.0145132
Afu7g00850	acetyltransferase, GNAT family, putative	0.752474	0.806509	0.904641	0.0138452	1.06824	1.95664
Afu2g17610	sulfatase domain protein	0.75097	-0.920707	0.49746	0.311775	-0.843387	0.788432
Afu1g02870	extensin-like protein, putative	0.749866	-0.521257	0.280712	-0.289033	0.100937	0.802768
Afu2g02760	protein-tyrosine phosphatase, putative	0.74928	0.161408	0.841114	0.239697	-0.147174	0.984658
Afu1g07230	DSBA-like thioredoxin domain protein	0.746935	-0.954935	-1.36729	0.105194	-0.631907	-1.20087
Afu2g01710	GPI anchored protein, putative	0.73846	-1.08468	1.27697	0.22238	-0.188541	2.11877
Afu4g09390	conserved hypothetical protein	0.734954	-0.398334	0.227475	0.383742	-0.396592	0.230954
Afu4g12670	DNA repair protein rad1, putative	0.730135	-0.772515	-0.343903	0.400262	-0.273758	-0.311614
Afu8g06810	hypothetical protein	0.72945	-0.48461	1.40618	-0.0592938	0.703514	1.43374
Afu4g11350	prenyltransferase, putative	0.725717	-0.631479	0.0308049	0.423729	0.102389	-0.0932778
Afu1g06750	hypothetical protein	0.72463	-0.801228	-0.126486	0.191866	-0.254247	0.0655644
Afu8g01260	hypothetical protein	0.723211	-1.21595	1.20232	-0.334651	1.25997	1.93187
Afu5g05900	protein kinase (Chm1), putative	0.720663	0.0661672	-0.157374	0.0988218	0.120732	-0.102691
Afu6g10300	thioredoxin, putative	0.720554	-0.803266	-0.0295561	0.204495	-0.0551893	0.285059
Afu3g10620	transcription initiation protein	0.720016	-0.515217	0.170691	0.222496	-0.0460741	0.312231
Afu7g02090	membrane associated DnaJ chaperone, putative	0.719443	-0.888019	-0.37741	0.503534	-0.4185	-0.278431
Afu3g12320	DUF676 domain protein	0.719316	-0.588622	0.455795	0.132629	-0.0937618	0.635547
Afu5g10490	amidase family protein, putative	0.717481	1.09	1.89415	0.0802937	1.43265	2.57609
Afu3g12700	DUF250 domain membrane protein	0.716734	-0.588967	-0.687954	0.410785	-0.626053	-0.480665
Afu6g06630	hypothetical protein	0.71396	-0.626696	0.348442	0.251432	-0.157841	0.394214
Afu1g03400	protein transport protein Sec23, putative	0.711	-1.0228	-0.451931	0.205838	-0.443661	-0.174408
Afu1g01340	C6 transcription factor, putative	0.710873	-0.96017	-1.0043	0.190261	-0.102709	-0.637603
Afu5g03500	alpha glucosidase II, alpha subunit, putative	0.710872	-2.61508	-1.01737	0.475813	-1.45621	-0.550518
Afu5g06960	conserved hypothetical protein	0.708683	-0.813889	-0.510293	0.28524	-0.243511	-0.388697
Afu1g15880	DUF803 domain membrane protein	0.705731	-0.606154	0.364259	0.218205	-0.127499	0.356838
Afu4g13010	conserved hypothetical protein	0.694635	-0.457796	0.674082	0.13845	-0.0759166	0.859482
Afu2g17250	esterase, putative	0.69214	-0.652394	-0.385838	0.110833	-0.407919	-0.262428
Afu2g02820	Yippee zinc-binding protein, putative	0.686702	-0.31353	0.962724	0.173355	0.0337221	0.982795
Afu3g13800	hypothetical protein	0.686624	-0.982236	-0.17574	0.250401	NaN	0.276124
Afu3g13100	hypothetical protein	0.686017	-0.591884	-0.844189	0.0922297	-0.163777	-0.555733
Afu2g03870	FKBP-type peptidyl-prolyl isomerase, putative	0.685759	-1.37476	-0.559808	0.264124	-0.741264	-0.172516
Afu7g04870	glutamine-serine-proline rich protein, putative	0.681717	-0.0967502	1.68036	0.139196	1.42563	1.75301
Afu7g00380	GNAT family acetyltransferase, putative	0.681588	0.36094	1.40608	0.373869	1.03082	1.84054
Afu3g08620	csh3 protein	0.679275	-0.561201	0.780546	0.297679	0.554315	1.00277
Afu1g07690	protein O-mannosyl transferase	0.678339	-1.17668	-0.767056	0.445136	-0.500926	-0.702997
Afu5g08140	hypothetical protein	0.672767	-0.405576	-0.533309	0.0817012	0.010981	-0.158179
Afu6g04960	ankyrin repeat protein	0.665592	-0.67566	-0.17286	0.503525	0.258421	-0.0667518
Afu2g10930	Golgi membrane protein (Rer1), putative	0.665236	-0.736721	0.228838	0.352706	-0.147607	0.336157
Afu6g05080	ABC transporter, putative	0.661687	-0.0652146	-0.238854	-0.0530882	-0.114735	0.192064
Afu4g14040	Hsp70 family protein	0.658413	0.0290054	0.0505259	0.106919	0.211837	0.519216
Afu1g14420	hypothetical protein	0.657339	-0.244225	0.864948	-0.106955	0.581071	0.736194
Afu4g11480	C2H2 finger domain protein, putative	0.652828	-0.338804	0.380234	-0.0564389	-0.765753	0.196874
Afu4g07390	endosomal cargo receptor (Erp5), putative	0.652433	-1.83142	-0.407281	0.111273	-0.908213	-0.0880838
Afu5g12580	GTP binding protein (GTPBP1), putative	0.647717	-0.237647	-0.126614	0.0916494	0.596402	0.476498
Afu1g04870	urea transporter (Dur3), putative	0.639157	-0.532501	0.314266	-0.266102	-0.132356	0.277666
Afu6g04670	DER1 protein, putative	0.637383	-1.94208	-0.414697	0.411165	-0.480965	-0.339796
Afu1g07570	hypothetical protein	0.63669	0.145122	0.890273	0.294078	0.236763	1.08739
Afu2g00500	conserved hypothetical protein	0.635147	0.28537	2.68692	0.113262	-0.336912	3.11545
Afu5g09230	transaldolase	0.634856	-0.275684	-0.379501	-0.0866975	0.379332	-0.372995
Afu3g07870	extracellular serine-rich protein	0.633648	-0.327286	-0.713931	0.195649	-0.700525	-0.153358
Afu2g01140	GPI anchored protein, putative	0.630316	-0.653729	1.41564	0.167256	0.162462	1.44338
Afu6g14060	hypothetical protein	0.629992	-0.231908	0.45839	0.052179	0.336803	0.860262
Afu5g07730	hypothetical protein	0.627736			-0.187799
Afu1g08880	heavy metal ion transporter, putative	0.62556	-1.10244	-0.747707	0.20073	-0.601843	-0.638686
Afu5g11380	rho-gdp dissociation inhibitor	0.625491	-0.786207	-0.768769	0.261334	-0.377606	-0.498151
Afu7g02310	adenine phosphoribosyltransferase 1	0.623903	0.137907	-0.343608	-0.0789906	-0.0479796	-0.14392
Afu1g10970	Coatomer subunit beta, putative	0.620157	-0.809913	-0.930042	0.0537456	-0.363824	-0.624267
Afu6g06900	Rho GTPase Rho1	0.619319	-0.232079	0.924087	0.22654	0.516066	0.902659
Afu6g06790	mannosyl-oligosaccharide alpha-1,2-mannosidase	0.616521	-0.945224	-0.7619	0.552473	-0.551729	-0.638087
Afu8g02130	1,3-beta-glucanosyltransferase, putative	0.612058	0.159534	1.10584	-0.285776	0.730493	1.42246
Afu1g10690	conserved hypothetical protein	0.604655	-0.558505	-0.0791561	0.0752474	0.404107	0.0844655
Afu1g12910	ABC fatty acid transporter, putative	0.603923	-0.738831	-0.390694	0.158239	-0.56551	-0.157465
Afu2g17320	conserved hypothetical protein	0.599939	-0.310759	1.1993	0.290537	0.179048	1.40945
Afu2g02010	transmembrane protein UsgS	0.598113	-0.91545	0.914884	-0.0143225	0.154034	1.29995
Afu2g01170	1,3-beta-glucanosyltransferase Gel1	0.597302	-0.27471	0.913652	-0.165142	-0.632247	0.998183
Afu8g04300	C2H2 finger domain protein, putative	0.596702	-0.069455	0.495982	0.00162157	0.290663	0.593202
Afu4g10810	hypothetical protein	0.59658	-0.217212	-0.130749	-0.0517374	-0.333104	-0.0763271
Afu4g06900	asparagine synthetase (glutamine-hydrolyzing) 2	0.595738	0.416615	0.126315	0.264789	0.691554	0.570418
Afu8g02070	glycosyl transferase, putative	0.592537	-1.04374	0.516338	-0.0237694	-0.0657346	0.787112
Afu2g12050	ZIP metal ion transporter, putative	0.590407	-1.85381	0.315452	0.309959	-1.03257	0.471687
Afu1g13340	DUF6 domain protein, putative	0.590177	-0.846087	-0.286913	0.426806	NaN	-0.0335689
Afu1g03760	DUF726 domain protein	0.587209	-0.23663	0.365024	0.0623512	0.402073	0.437904
Afu6g02290	hypothetical protein	0.586796	0.0686519	0.429268	0.040269	0.660567	0.704991
Afu8g01970	extracellular endo-polygalacturonase, putative	0.586674	0.278922	-0.100267	0.0861633	-0.265477	0.433295
Afu1g04890	translocon subunit	0.585136	-2.83103	-1.69124	0.572328	-1.98943	-1.33244
Afu6g04800	lysine decarboxylase-like protein	0.58469	-0.0257375	0.101043	0.159679	0.203475	0.168173
Afu2g13440	chitin synthase E	0.582789	-0.20919	0.350897	0.167316	-0.278505	0.445528
Afu2g04470	hypothetical protein	0.581844	-0.400945	0.808305	-0.230249	0.111371	1.01163
Afu6g06590	DnaJ chaperone (Caj1), putative	0.581748	-0.705528	0.450982	0.323284	0.439051	0.716517
Afu2g03620	oxidoreductase, short-chain dehydrogenase/reductase family	-0.583025	-0.277398	-0.315692	0.173503	NaN	0.180192
Afu2g17660	C4-dicarboxylate transporter/malic acid transport protein, putative	-0.58351	-0.0755018	0.0928681	0.228909	NaN	-0.505185
Afu3g13830	PH domain protein	-0.58355	0.176722	-0.189579	-0.485945	0.0802927	-0.441774
Afu3g03350	nonribosomal peptide synthase, putative	-0.584198	2.96565	-0.0217009	0.144083	1.09245	0.238484
Afu2g03960	acid phosphatase	-0.585982	0.150626	0.292664	-0.222199	-0.223553	-0.0601218
Afu6g02100	integral membrane protein	-0.586822	-0.18159	-0.634149	0.235175	NaN	-0.418626
Afu7g06910	hypothetical protein	-0.590177	-0.191661	-0.486021	0.290038	0.00910008	-0.49283
Afu3g01860	hypothetical protein	-0.590716	0.0464261	-0.407428	0.112926	NaN	-0.0743479
Afu2g10690	MFS phosphate transporter, putative	-0.591454	1.69701	1.1986	0.141322	0.363869	0.646077
Afu8g05760	dehydrogenase	-0.592637	0.366753	0.321597	0.0534956	0.117376	0.353515
Afu6g12180	conserved hypothetical protein	-0.595909	0.683325	1.68547	-0.512872	0.578861	1.49995
Afu4g05900	conserved hypothetical protein	-0.59853	0.262782	1.06446	-0.394513	0.248468	0.960954
Afu3g01110	GMP synthase	-0.60028	1.27648	0.469593	0.060488	0.200889	0.37385
Afu5g07480	hypothetical protein	-0.601861	-0.0859251	-1.12855	-0.0945119	-0.480676	-0.818396
Afu6g11970	WSC domain protein, putative	-0.602003	-0.0819586	-0.567073	0.0127918	NaN	-0.221359
Afu5g12790	mitochondrial 3-hydroxyisobutyryl-CoA hydrolase, putative	-0.603116	0.340097	-0.268379	0.0772387	0.0752893	-0.431005
Afu2g16900	epoxide hydrolase, putative	-0.603899	0.195309	0.517675	-0.539174	0.115766	0.229861
Afu3g13190	hypothetical protein	-0.611052	0.0746462	-0.0881284	0.0457473	0.197291	-0.15156
Afu2g03760	ssu72 protein	-0.612696	0.231733	0.629805	0.375017	0.0914449	0.615181
Afu4g09040	high affinity methionine permease	-0.618904	-0.0689449	-0.241884	0.109402	-0.130208	-0.537815
Afu1g03340	hypothetical protein	-0.62044	0.196994	0.00114203	0.316546	-0.445059	0.227531
Afu2g13720	RNA-polymerase I	-0.620558	0.983004	0.395185	-0.10545	0.116615	0.497295
Afu1g14300	Fasciclin domain family	-0.620713	0.13683	-0.309192	-0.373305	-0.374233	-0.427542
Afu6g01900	hypothetical protein	-0.622597	0.297819	-0.594295	0.0993545	-0.267303	-0.675875
Afu5g02470	thiamine biosynthesis protein (Nmt1), putative	-0.622896	0.261298	-0.163124	-0.322599	0.11303	-0.157949
Afu5g08600	homoserine O-acetyltransferase	-0.62382	0.635498	0.379836	-0.0300363	NaN	0.21512
Afu2g11750	mitochondrial DnaJ chaperone (Mdj1), putative	-0.626543	0.22925	0.916973	-0.11112	0.211495	0.472765
Afu2g09960	mitochondrial Hsp70 chaperone (Ssc70), putative	-0.628208	0.524343	1.04482	-0.374151	0.215223	0.731976
Afu1g03960	Rhodanese domain protein	-0.631651	-0.0191379	-0.544251	-0.119449	-0.181536	-0.38932
Afu2g02200	hypothetical protein	-0.63181	0.390533	0.0929382	-0.165096	-0.241932	0.397643
Afu7g05200	conserved hypothetical protein	-0.63225	0.105659	-0.551787	0.352936	-0.00281578	-0.361235
Afu8g00970	hypothetical protein	-0.632797	0.213084	0.188424	-0.306257	-0.167174	0.013034
Afu6g10120	oxidoreductase, zinc-binding	-0.633288	0.189216	-1.51943	-0.446374	-0.414782	-1.76422
Afu5g07490	steroid monooxygenase [imported]	-0.634401	0.0588533	-0.661697	-0.419511	-0.317474	-0.654052
Afu2g02700	mitochondrial DnaJ chaperone (Tim14), putative	-0.634985	-0.0153436	0.247286	-0.221992	-0.48674	0.418447
Afu3g12530	sensor histidine kinase/response regulator, putative	-0.641637	0.422979	-0.389585	-0.106859	0.16357	-0.539772
Afu3g02240	aromatic-L-amino-acid decarboxylase	-0.643717	0.741203	-0.365625	-0.113122	NaN	-0.473063
Afu5g04250	homocysteine synthase, putative	-0.651092	0.405879	-0.467009	-0.468951	-0.188744	-0.663761
Afu5g02090	UPF0047 domain protein	-0.651143	0.128008	-0.100168	-0.0437438	-0.119246	-0.171652
Afu1g07630	zinc knuckle domain protein (Byr3), putative	-0.654043	0.968965	0.0745895	-0.0231124	0.134941	-0.255355
Afu2g00790	hypothetical protein	-0.655648	0.190499	0.468816	-0.089179	0.0774693	0.284868
Afu1g02630	periodic tryptophan protein (Pwp1), putative	-0.656858	0.570878	0.491814	0.307133	0.307888	0.167301
Afu2g12540	hypothetical protein	-0.659912	0.163731	-0.0142849	-0.143198	-9.3e-05	-0.0303989
Afu3g12300	Ribosomal L22e protein family	-0.662772	0.297867	-0.416795	0.350692	0.226283	-0.318138
Afu3g08160	eukaryotic translation initiation factor eIF4A, putative	-0.663971	1.46569	0.358909	0.218102	0.827505	0.156456
Afu4g07250	conserved hypothetical protein	-0.66482	0.412739	0.0444493	0.112077	0.122507	-0.137858
Afu1g02570	aspartyl-tRNA synthetase, cytoplasmic	-0.665123	0.94033	0.827664	-0.525832	0.254333	0.163072
Afu6g07360	ribosomal protein S8	-0.667083	0.0793214	0.277103	0.422655	0.0408387	0.160952
Afu6g13230	Nit protein 2	-0.669926	0.544763	0.115553	-0.0228709	0.195316	0.120626
Afu8g05470	hypothetical protein	-0.671373	0.409677	-0.0808394	-0.303746	-0.402997	-0.422499
Afu8g06430	hypothetical protein	-0.673804	-0.0705133	-0.555245	0.000652	-0.282918	0.0498692
Afu1g14560	alpha-mannosidase	-0.674015	-0.555274	-0.52227	-0.0961894	-0.561281	-0.807784
Afu1g09850	mitochondrial small ribosomal subunit S11, putative	-0.677683	0.402831	-0.05535	-0.107673	-0.124159	-0.306734
Afu3g06540	3'-phosphoadenosine-5'-phosphosulfate reductase	-0.678505	0.874052	0.164942	0.134768	0.333022	0.431496
Afu2g05560	exonuclease, putative	-0.6886	0.862609	1.20527	0.257456	0.0943189	1.26455
Afu3g14260	mismatched base pair and cruciform DNA recognition protein, putative	-0.689255	0.218714	-0.660783	0.0272508	-0.00196564	-0.449673
Afu1g14650	WD repeat protein	-0.697887	0.228069	-0.280338	0.12434	NaN	-1.06926
Afu5g02850	conserved hypothetical protein	-0.698417	0.219836	-1.69629	-0.352515	-0.766349	-2.00349
Afu4g10740	mitochondrial large ribosomal subunit L24, putative	-0.699894	0.0784443	-0.157056	0.0883085	-0.303254	-0.243482
Afu4g08400	hypothetical protein	-0.703373	0.0295231	-0.621686	0.151094	-0.381558	-0.424209
Afu5g12270	rRNA processing protein (Ebp2), putative	-0.704211	0.69877	-0.775502	0.0131465	0.0689145	-0.401293
Afu2g04010	alpha,alpha-trehalose-phosphate synthase subunit, putative	-0.705194	0.463183	1.41919	-0.384428	0.610033	1.11247
Afu6g09450	NB-ARC domain protein	-0.706698			0.47747
Afu2g02050	peptidyl-prolyl cis-trans isomerase, putative	-0.710356	1.44374	3.01236	-0.459193	1.53623	2.86315
Afu7g02400	alcohol dehydrogenase, zinc-containing	-0.715801	0.385592	-0.138728	0.119742	NaN	-0.070014
Afu5g04170	molecular chaperone HSP90	-0.720838	1.69522	1.65329	-0.177697	1.77839	0.969483
Afu4g05920	mitochondrial protein sorting (Msf1), putative	-0.725594	0.569716	0.535893	0.324508	0.393838	0.0477057
Afu6g12730	integral membrane protein	-0.729124	0.44928	-1.39231	-0.389575	-0.276139	-1.73377
Afu3g12920	nonribosomal peptide synthase (GliP), putative	-0.731744	0.130936	-0.234961	0.385126	NaN	-0.0517268
Afu2g14210	mitochondrial dihydroxy acid dehydratase, putative	-0.744779	1.6003	0.447088	-0.272221	0.219831	0.209855
Afu2g15430	L-xylulose reductase	-0.751735	0.0831863	-1.03021	-0.1062	-0.270391	-1.06062
Afu8g07120	beta-1,6-glucanase, putative	-0.754931			0.274499
Afu1g12590	RNA-binding La domain protein	-0.758363	1.24751	0.0278348	0.234333	0.272303	0.0176717
Afu6g11310	bifunctional pyrimidine biosynthesis protein (PyrABCN), putative	-0.760378	1.83274	0.596016	0.220778	0.437882	0.112223
Afu6g07720	phosphoenolpyruvate carboxykinase (ATP)	-0.767946	2.03086	1.40682	-0.0638444	1.78158	0.774962
Afu2g09510	hypothetical protein	-0.77041	1.00023	1.51856	-0.149206	1.37216	1.26173
Afu7g03940	alpha,alpha-trehalose phosphate synthase subunit TPS3, putative	-0.77231	0.478993	0.383758	0.0279905	0.541387	0.334001
Afu4g11270	hypothetical protein	-0.772338	0.916304	-0.559465	-0.52682	-0.053133	-0.899591
Afu1g17030	glycosyl transferase, putative	-0.776846	0.171544	-1.18077	-0.229389	-0.919349	-1.71323
Afu4g11900	TIM54	-0.785771	0.503563	-0.686066	0.0442118	-0.313047	-0.419816
Afu6g14360	cytochrome P450, putative	-0.793806	0.545045	-0.191694	0.138539	0.141516	-0.516782
Afu2g15870	importin beta-5 subunit, putative	-0.794739	0.381619	-0.0698397	-0.172345	0.0506103	0.176101
Afu4g07630	microtubule associated protein (Ytm1), putative	-0.802319	1.25546	-0.0578608	0.224171	0.308539	-0.0998862
Afu4g09190	S-adenosyl-methionine-sterol-C- methyltransferas	-0.805744	1.58138	-0.881689	-0.297046	0.702184	-0.880115
Afu2g05060	alternative oxidase	-0.807322	1.86718	1.33896	0.173942	1.56607	0.681837
Afu8g04890	hypothetical protein	-0.808711	1.27557	0.625971	-0.163913	0.121481	-0.0184396
Afu4g08960	GPI anchored protein, putative	-0.812398	-0.686231	-1.37551	-0.221621	-1.15671	-2.42628
Afu5g13270	PalH	-0.814466	-0.0959341	-0.109253	-0.0630461	-0.102363	0.340174
Afu2g02320	Hsp70 chaperone (BiP), putative	-0.81471	1.59434	1.04656	0.00157141	0.874107	0.942939
Afu2g05990	conserved hypothetical protein	-0.838623	0.395415	-0.534309	-0.568316	-0.499618	-0.796617
Afu5g11040	pantoate--beta-alanine ligase	-0.853459	-0.228396	0.209987	0.0785479	-0.52776	-0.163928
Afu5g13550	hypothetical protein	-0.889849	0.295085	-0.538403	-0.520152	-0.930953	-1.12338
Afu4g07540	small nucleolar ribonucleoprotein complex subunit, putative	-0.922295	1.49538	0.616786	0.357274	0.49453	0.0482166
Afu3g09040	conserved hypothetical protein	-0.953794	1.71393	0.87887	-0.0441617	0.389883	0.540659
Afu8g05460	bZIP transcription factor, putative	-0.965109	0.524646	0.171912	-0.243847	-0.196609	-0.31294
Afu5g02700	multidrug resistant protein	-0.970976	0.495499	-1.39021	-0.163854	1.28375	-1.89061
Afu3g10800	eukaryotic translation initiation factor 3 subunit CLU1/TIF31, putative	-0.988893	1.13724	-0.0759404	0.169506	-0.0159045	-0.347793
Afu8g03930	Hsp70 chaperone (HscA), putative	-1.01209	1.82289	0.421102	0.00418411	0.372619	0.0767742
Afu2g10660	mannitol-1-phosphate dehydrogenase	-1.04209	0.922268	1.11245	-0.417365	0.330956	0.385094
Afu2g16860	membrane transporter	-1.04359	1.20616	0.157368	-0.435488	1.19298	0.0525564
Afu4g08110	translation elongation factor G1, putative	-1.08149	0.584189	0.207467	-0.434632	-0.286147	0.0193014
Afu2g08280	NADP-dependent malic enzyme	-1.12605	0.832437	1.1997	0.135255	0.756315	0.959212
Afu1g17020	UDP-glucose dehydrogenase	-1.23741	0.266215	-1.0734	-0.48113	-0.546226	-1.44666

## Sheet: 5
Locus	Common Name	WT+DTT / WT	ΔhacA+DTT / WT+DTT	ΔireA+DTT / WT+DTT	WT+Tm / WT	ΔhacA+Tm / WT+Tm	ΔireA+Tm / WT+Tm
Afu7g04560	hypothetical protein	-0.0209858	-0.100942	1.6698	1.10432	0.238698	1.1802
Afu2g01840	conserved hypothetical protein	-0.00358013	0.0977195	0.300271	0.996804	-0.0541475	0.373912
Afu1g07380	NADH-dependent glutamate synthase (GLT1), putative	-0.00767239	-0.0656694	0.368399	0.974027	0.010713	0.549427
Afu3g06820	oxidoreductase, FAD-binding	0.110568	0.0191553	-0.0489826	0.972912	0.390027	-0.0620961
Afu6g05310	hypothetical protein	-0.568753	0.399955	-0.056048	0.947483	0.459733	-0.0688866
Afu8g05310	DUF962 domain protein	0.0977346	-1.04859	-0.0531932	0.87675	-0.769398	-0.16325
Afu1g03020	My026 protein	0.187259	-1.07318	-0.39501	0.8556	-0.641268	-0.212728
Afu2g10030	vip1 protein	-0.420565	0.608476	1.0449	0.810785	0.365613	0.908511
Afu2g02660	DNA topoisomerase III, putative	-0.127171	0.612024	1.05182	0.795144	-0.021614	1.29518
Afu5g10210	hypothetical protein	-0.063508	0.174347	-0.490719	0.735935	0.272262	-0.553142
Afu3g03330	mitochondrial enoyl reductase, putative	-0.390853	1.52836	-1.10529	0.716623	0.671673	-1.14605
Afu5g07530	hypothetical protein	-0.413663			0.715772
Afu1g16840	TCTP domain protein	0.0434357	0.407154	-0.136695	0.715143	0.314289	-0.147045
Afu6g10700	chaperonin, putative	-0.275299	-0.06753	-0.0363861	0.70384	0.00790652	-0.256784
Afu4g06090	nuclear pore complex subunit (SEC13), putative	0.311041	-0.569689	-0.421041	0.701609	0.0139087	-0.303246
Afu5g05460	cytosine deaminase-uracil phosphoribosyltransferase fusion protein	-0.282556	0.181127	0.158954	0.685493	0.0569839	0.114622
Afu3g07900	conserved hypothetical protein	0.130364	-0.124174	0.51935	0.669623	-0.291972	0.275085
Afu4g09710	C6 sexual development transcription factor Pro1	-0.0981221			0.648766
Afu5g10940	conserved hypothetical protein	-0.554771	0.58828	-2.30341	0.64121	-1.0058	-2.47091
Afu5g02660	hypothetical protein	0.266795	-0.905551	-0.754826	0.639295	-0.557592	-0.602152
Afu8g00930	chitosanase, putative	-0.256942			0.632586
Afu2g05390	Domain found in Dishevelled, Egl-10, and Pleckstrin domain protein	-0.174842	0.194814	-0.485936	0.630828	-0.130212	0.0375317
Afu5g00430	MFS transporter, putative	-0.175585	-0.0976022	0.112661	0.624331	0.324934	-0.158902
Afu7g06100	acyl-coenzyme A oxidase I, peroxisomal, component A	-0.00102676	0.242848	0.954885	0.608535	0.195082	1.30624
Afu1g10750	prolyl-tRNA synthetase	-0.303333	-0.30845	-0.871978	0.602145	-0.757107	-0.782391
Afu1g03570	acid phosphatase PHOa	0.0216852	0.0338664	0.533484	0.597	-0.183886	0.29959
Afu6g03970	NUV101	0.304366	-0.711441	0.248167	0.596814	0.0498643	0.214656
Afu3g08030	Met-10+ like-protein, putative	-0.0352017	0.201745	0.213236	0.594192	0.308455	0.321419
Afu2g16530	cyanate hydratase, putative	-0.0118839	-0.036397	1.43155	0.587072	-0.0369421	1.43534
Afu5g13620	ubiquitin C-terminal hydrolase, putative	-0.136165	0.00402497	-0.217632	0.400262	-0.0433285	-0.0170918
Afu4g13630	PE repeat family protein	-0.382536	-0.0316773	-0.582476	-0.582465	-0.331388	-0.694875
Afu6g10450	hypothetical protein	-0.120405	-0.236923	-1.26075	-0.584777	-0.739467	-1.38462
Afu6g13330	conserved hypothetical protein	-0.538218	0.0674381	-1.80789	-0.588135	-1.12018	-1.96814
Afu5g08210	dolichyl-phosphate beta-glucosyltransferase, putative	0.256063	-0.52976	-0.673642	-0.593138	0.234225	-0.624882
Afu4g06620	Glutamate/Leucine/Phenylalanine/Valine dehydrogenase, putative	0.101703	-1.01906	0.22219	-0.596311	0.180873	0.38543
Afu5g13050	kinesin family protein	-0.35921	0.730503	0.491121	-0.607494	0.0678423	0.126898
Afu3g13690	pyoverdine chromophore biosynthetic protein, putative	0.108761	-0.647211	-2.54152	-0.622227	-0.633295	-2.87262
Afu6g00310	serine carboxypeptidase (CpdS), putative	-0.442357	-0.228622	-1.4913	-0.62712	-1.5021	-1.71895
Afu3g15210	endo-1,4-beta-xylanase, putative	-0.128483			-0.629047
Afu3g08110	cell wall protein, putative	-0.370469	-1.43668	-2.00984	-0.62918	-1.7116	-1.4198
Afu3g11550	LEA domain protein	-0.23247	-0.219382	-1.19204	-0.630204	-0.436777	-0.918594
Afu7g08560	hypothetical protein	0.0446511	-0.0234989	-0.0766723	-0.632228	0.769939	-0.0264047
Afu3g00370	phosphoketolase, putative	-0.387388	-0.139712	-2.12816	-0.635606	-0.60684	-1.95268
Afu5g13040	translation initiation factor eif-2b delta subunit	-0.06069	0.39813	0.474967	-0.637825	0.352373	0.0482357
Afu5g02840	sugar transporter family protein, putative	-0.436587	0.121454	-1.21458	-0.638907	-0.645019	-1.26714
Afu5g14210	glucose-repressible gene protein-related protein	-0.283411	-0.522624	-1.5569	-0.639908	-0.953304	-1.29163
Afu6g04460	phosphatidyl synthase	-0.0875357	1.18389	0.729579	-0.65439	1.79802	0.434866
Afu2g12450	hydroxymethylglutaryl-CoA lyase	-0.234334	0.142186	1.7095	-0.655124	0.0863598	1.39809
Afu8g04560	integral membrane protein	-0.17888	-0.168026	-0.124176	-0.655839	-0.083308	-0.243438
Afu1g03630	GPI anchored serine-threonine rich protein	-0.214433	0.261156	-0.0617437	-0.66401	-0.130835	0.129599
Afu7g06050	ubiquitin-associated domain protein, putative	-0.150116	0.251456	0.32017	-0.668552	0.437563	0.225061
Afu6g08750	delta-1-pyrroline-5-carboxylate dehydrogenase	0.0711818	0.332064	0.717853	-0.669722	0.463668	0.325688
Afu4g14380	conserved hypothetical protein	-0.120094	0.195138	-2.34857	-0.672566	0.125003	-2.26287
Afu2g10370	Iron-sulfur cluster assembly accessory protein subfamily, putative	-0.00101282	1.23455	0.734316	-0.675622	1.50128	0.273648
Afu5g00590	hypothetical protein	-0.152697	0.0648587	-1.08497	-0.683226	-0.0836271	-0.996514
Afu6g12720	cytosolic ribosomal protein (Rps29a), putative	-0.37877	0.203687	-0.693392	-0.683712	0.138759	-0.585139
Afu6g07670	cytochrome c oxidase assembly protein cox15	-0.310376	-0.537663	-1.7294	-0.687966	-0.787013	-1.49803
Afu1g15610	oxidoreductase, zinc-binding dehydrogenase family, putative	0.349927	1.0189	0.401971	-0.700072	0.779288	-0.330503
Afu7g05660	elongation factor EF-3, putative	-0.0686377	1.18075	0.731638	-0.701711	0.967109	0.672021
Afu2g12910	PtaB protein, putative	-0.238217	0.272971	-0.520097	-0.70291	-0.194764	-0.582916
Afu6g04920	NAD-dependent formate dehydrogenase	-0.371254	-0.378899	-1.64185	-0.721148	-2.15159	-1.0963
Afu7g04410	hypothetical protein	0.123129	-0.0663002	-0.034934	-0.72478	-0.890519	-0.054624
Afu5g12240	oxidoreductase, 2OG-Fe(II) oxygenase family, putative	-0.0533005	0.708384	0.239586	-0.732916	0.806765	0.278796
Afu5g02480	glycogen synthase	-0.382434	0.240037	0.454136	-0.75061	-0.0921353	0.295639
Afu2g03120	cell wall glucanase (Utr2), putative	-0.0647989	1.23108	0.836987	-0.751513	2.123	0.525919
Afu8g01820	hypothetical protein	0.0143597	0.0804441	-0.287931	-0.752586	0.442954	-0.286527
Afu4g13880	ankyrin repeat protein	0.45229	-0.376764	0.112982	-0.817522	0.50926	0.636668
Afu4g09640	GAJ protein, putative	0.318837	-0.378586	-0.362198	-0.887097	-0.504556	-0.516629
Afu4g12450	lysine-rich protein	-0.317835	0.858746	0.22324	-0.917006	0.113306	0.474122
Afu1g01530	GrpB domain protein	0.202159	1.43672	1.80571	-0.925266	1.19196	1.94753
Afu4g06890	14-alpha sterol demethylase Cyp51A	0.409145	-1.7982	-1.69438	-0.980714	-1.16772	-1.33323
Afu2g01010	myo-inositol-phosphate synthase, putative	-0.164667	-0.449289	-0.376974	-1.2758	-0.334023	-0.566386

## Sheet: 6
GO Category	Locus	Common Name	Pathway
oxidoreductase activity	Afu4g14850	extracellular 3-ketosteroid 1-dehydrogenase, putative	HacAu
oxidoreductase activity	Afu2g00750	oxidoreductase, 2OG-Fe(II) oxygenase family, putative	HacAu
oxidoreductase activity	Afu2g14970	Gamma-butyrobetaine hydroxylase subfamily, putative	HacAu
oxidoreductase activity	Afu6g01810	cytochrome P450, putative	HacAu
oxidoreductase activity	Afu8g01310	metalloreductase, putative	HacAu
oxidoreductase activity	Afu6g10990	NADPH cytochrome P450 reductase (CprA), putative	HacAu
oxidoreductase activity	Afu6g13390	conserved hypothetical protein	HacAu
oxidoreductase activity	Afu3g00350	hypothetical protein	HacAu
oxidoreductase activity	Afu4g14630	FAD binding domain protein	HacAu
oxidoreductase activity	Afu2g16570	short chain dehydrogenase/reductase, putative	HacAu
hydrolase activity	Afu4g01130	dienelactone hydrolase family protein	HacAu
hydrolase activity	Afu2g09350	endo-beta-1,6-glucanase, putative	HacAu
hydrolase activity	Afu5g12840	hydroxyacylglutathione hydrolase, putative	HacAu
hydrolase activity	Afu7g04390	hypothetical protein	HacAu
hydrolase activity	Afu8g02780	vacuolar protein sorting protein, putative	HacAu
hydrolase activity	Afu7g01540	endo-1,4-beta-glucanase	HacAu
hydrolase activity	Afu1g03660	acid phosphatase, putative	HacAu
hydrolase activity	Afu2g16970	mitochondrial large ribosomal subunit L30, putative	HacAu
hydrolase activity	Afu6g03710	amidohydrolase, putative	HacAu
hydrolase activity	Afu8g07030	endo-1,4-beta-mannosidase, putative	HacAu
transferase activity	Afu8g04500	mannosyltransferase PMTI	HacAu
transferase activity	Afu8g01310	metalloreductase, putative	HacAu
transferase activity	Afu6g04380	molecular chaperone (ABC1), putative	HacAu
transferase activity	Afu2g11260	3-isopropylmalate dehydratase, putative	HacAu
transferase activity	Afu7g04190	cyclopropane-fatty-acyl-phospholipid synthase, putative	HacAu
transferase activity	Afu5g08970	oligosaccharyl transferase subunit (beta), putative	HacAu
transferase activity	Afu2g11080	glucosyltransferase (Die2), putative	HacAu
transferase activity	Afu3g14920	LaeA-like methyltransferase, putative	HacAu
transferase activity	Afu8g04430	oligosaccharyl transferase subunit (Stt3), putative	HacAu
transferase activity	Afu2g02120	phosphoglucomutase, putative	HacAu
transferase activity	Afu6g04290	phosphoethanolamine N-methyltransferase, putative	HacAu
transferase activity	Afu5g02740	alpha-1,2-mannosyltransferase (Ktr4), putative	HacAu
transferase activity	Afu3g09950	Phospholipid:diacylglycerol acyltransferase, putative	HacAu
oxidoreductase activity	Afu1g17170	alpha-ketoglutarate-dependent taurine dioxygenase	HacAi
oxidoreductase activity	Afu5g14330	CPRD8 protein	HacAi
oxidoreductase activity	Afu6g14340	glucooligosaccharide oxidase, putative	HacAi
oxidoreductase activity	Afu2g10960	alcohol dehydrogenase, putative	HacAi
oxidoreductase activity	Afu6g07670	cytochrome c oxidase assembly protein cox15	HacAi
oxidoreductase activity	Afu1g14540	oxidoreductase, short-chain dehydrogenase/reductase family	HacAi
oxidoreductase activity	Afu6g12500	AhpC/TSA family protein	HacAi
oxidoreductase activity	Afu4g13780	polyphenol monooxygenase, putative	HacAi
oxidoreductase activity	Afu6g09740	thioredoxin reductase GliT	HacAi
oxidoreductase activity	Afu1g17040	D-lactate dehydrogenase	HacAi
oxidoreductase activity	Afu8g00920	UDP-glucose dehydrogenase Uxs2p	HacAi
oxidoreductase activity	Afu3g01580	GMC oxidoreductase, putative	HacAi
oxidoreductase activity	Afu6g04920	NAD-dependent formate dehydrogenase	HacAi
oxidoreductase activity	Afu6g13750	ferric-chelate reductase, putative	HacAi
oxidoreductase activity	Afu1g14520	pyridine nucleotide-disulphide oxidoreductase, putative	HacAi
oxidoreductase activity	Afu6g03770	oxidoreductase (Msc7), putative	HacAi
oxidoreductase activity	Afu6g10120	oxidoreductase, zinc-binding	HacAi
oxidoreductase activity	Afu4g08710	short chain dehydrogenase, putative	HacAi
oxidoreductase activity	Afu8g05140	oxidoreductin	HacAi
oxidoreductase activity	Afu2g01890	CAT5 protein	HacAi
oxidoreductase activity	Afu5g14340	oxidoreductase, short-chain dehydrogenase/reductase family, putative	HacAi
oxidoreductase activity	Afu6g03510	polyamine oxidase, putative	HacAi
oxidoreductase activity	Afu3g03560	pyridine nucleotide-disulfide oxidoreductase, putative	HacAi
oxidoreductase activity	Afu1g14340	metalloreductase, putative	HacAi
oxidoreductase activity	Afu7g06780	hypothetical protein	HacAi
oxidoreductase activity	Afu1g17630	FAD/FMN-containing protein	HacAi
oxidoreductase activity	Afu4g12710	hypothetical protein	HacAi
oxidoreductase activity	Afu6g00740	hypothetical protein	HacAi
oxidoreductase activity	Afu6g10720	alpha-ketoglutarate-dependent taurine dioxygenase	HacAi
hydrolase activity	Afu4g13770	glycosyl hydrolase, putative	HacAi
hydrolase activity	Afu6g09520	hypothetical acetyl hydrolase	HacAi
hydrolase activity	Afu4g00390	glycosyl hydrolase, putative	HacAi
hydrolase activity	Afu6g01940	conserved hypothetical protein	HacAi
hydrolase activity	Afu2g14520	hydrolase, putative	HacAi
transferase activity	Afu5g14810	pyruvate decarboxylase, putative	HacAi
transferase activity	Afu5g04250	homocysteine synthase, putative	HacAi
transferase activity	Afu4g10330	CaaX farnesyltransferase beta subunit Ram1	HacAi
transferase activity	Afu1g17010	glutathione S-transferase	HacAi
transferase activity	Afu1g13930	Leucine carboxyl methyltransferase superfamily	HacAi
transferase activity	Afu4g14240	O-methyltransferase	HacAi
Transporter activity	Afu7g04730	siderochrome-iron transporter, putative	HacAi
Transporter activity	Afu5g06230	gaba-specific permease	HacAi
Transporter activity	Afu5g02840	sugar transporter family protein, putative	HacAi
Transporter activity	Afu8g06870	MFS sugar transporter, putative	HacAi
Transporter activity	Afu3g13660	Ctr copper transporter family protein	HacAi
Transporter activity	Afu5g03800	high-affinity iron permease CaFTR2	HacAi
Transporter activity	Afu6g07320	drug resistance transporter, EmrB/QacA family, putative	HacAi
Transporter activity	Afu1g13360	C4-dicarboxylate transporter/malic acid transport protein, putative	HacAi
Transporter activity	Afu5g14660	GABA permease, putative	HacAi
Transporter activity	Afu3g12200	small oligopeptide transporter, OPT family	HacAi
Transporter activity	Afu1g17020	UDP-glucose dehydrogenase	HacAi
Transporter activity	Afu1g04890	translocon subunit	HacAi
Transporter activity	Afu7g06060	siderochrome-iron transporter (Sit1), putative	HacAi
Oxidoreductase activity	Afu1g07200	mitochondrial cytochrome b2, putative	IreA
Oxidoreductase activity	Afu5g14800	lactate dehydrogenase	IreA
Oxidoreductase activity	Afu5g01580	oxidoreductase, short chain dehydrogenase/reductase family	IreA
Oxidoreductase activity	Afu4g07050	L-lactate dehydrogenase	IreA
Oxidoreductase activity	Afu3g05370	dihydrolipoamide succinyltransferase, putative	IreA
Oxidoreductase activity	Afu7g00620	hypothetical protein	IreA
Oxidoreductase activity	Afu7g00640	conserved hypothetical protein	IreA
Oxidoreductase activity	Afu3g04150	mitochondrial enoyl reductase, putative	IreA
Oxidoreductase activity	Afu4g00610	aryl-alcohol dehydrogenase, putative	IreA
Oxidoreductase activity	Afu1g17650	short chain dehydrogenase, putative	IreA
Oxidoreductase activity	Afu1g04090	FAD dependent oxidoreductase, putative	IreA
Oxidoreductase activity	Afu5g01210	amine oxidase, flavin-containing superfamily	IreA
Oxidoreductase activity	Afu5g10790	conserved hypothetical protein	IreA
Oxidoreductase activity	Afu6g09590	zinc-containing alcohol dehydrogenase, putative	IreA
Oxidoreductase activity	Afu1g17270	ferric-chelate reductase (Fre2), putative	IreA
Oxidoreductase activity	Afu3g00100	flavin-containing amine oxidase, putative	IreA
Oxidoreductase activity	Afu3g02120	short-chain dehydrogenase/reductase family protein, putative	IreA
Oxidoreductase activity	Afu8g06440	fructosyl amino acid oxidase, putative	IreA
Oxidoreductase activity	Afu1g01000	oxidoreductase, 2OG-Fe(II) oxygenase family	IreA
Oxidoreductase activity	Afu6g02280	allergen Asp F3	IreA
Oxidoreductase activity	Afu3g00840	FAD-dependent oxygenase, putative	IreA
Oxidoreductase activity	Afu4g10100	FAD binding domain protein	IreA
Oxidoreductase activity	Afu3g10010	conserved hypothetical protein	IreA
Oxidoreductase activity	Afu6g02820	metalloreductase, putative	IreA
Oxidoreductase activity	Afu4g12930	ubiquinone biosynthesis monooxgenase (Coq6), putative	IreA
Oxidoreductase activity	Afu5g11160	oxidoreductase, 2OG-Fe(II) oxygenase family, putative	IreA
Oxidoreductase activity	Afu2g05450	64 kDa mitochondrial NADH dehydrogenase	IreA
Oxidoreductase activity	Afu8g06840	oxidoreductase, short chain dehydrogenase/reductase family	IreA
Oxidoreductase activity	Afu3g01900	conserved hypothetical protein	IreA
Oxidoreductase activity	Afu4g11710	oxidoreductase, zinc-binding dehydrogenase family superfamily	IreA
Oxidoreductase activity	Afu1g00980	FAD-dependent oxidase, putative	IreA
Oxidoreductase activity	Afu4g00560	NAD binding Rossmann fold oxidoreductase, putative	IreA
Oxidoreductase activity	Afu3g12950	FAD binding domain protein	IreA
Oxidoreductase activity	Afu1g04620	alcohol dehydrogenase, zinc-containing, putative	IreA
Oxidoreductase activity	Afu3g07960	alpha-ketoglutarate-dependent taurine dioxygenase	IreA
Oxidoreductase activity	Afu3g09190	aldehyde reductase I (ARI), putative	IreA
Oxidoreductase activity	Afu7g04980	3-ketoacyl-acyl carrier protein reductase	IreA
Oxidoreductase activity	Afu5g03840	oxidoreductase, short chain dehydrogenase/reductase family	IreA
Oxidoreductase activity	Afu4g14830	cytochrome P450 monooxygenase, putative	IreA
Oxidoreductase activity	Afu1g07230	DSBA-like thioredoxin domain protein	IreA
Oxidoreductase activity	Afu7g01560	FAD dependent oxidoreductase, putative	IreA
Oxidoreductase activity	Afu8g04090	choline oxidase (CodA), putative	IreA
Oxidoreductase activity	Afu2g18050	FAD binding oxidoreductase, putative	IreA
Oxidoreductase activity	Afu6g07090	maleylacetate reductase, putative	IreA
Oxidoreductase activity	Afu3g05740	aldose 1-epimerase, putative	IreA
Oxidoreductase activity	Afu5g09150	oxidoreductase, short-chain dehydrogenase/reductase family	IreA
Oxidoreductase activity	Afu1g01770	short chain oxidoreductase/dehydrogenase, putative	IreA
Oxidoreductase activity	Afu5g00460	conserved hypothetical protein	IreA
Oxidoreductase activity	Afu6g02900	hypothetical protein	IreA
Oxidoreductase activity	Afu3g07420	hypothetical protein	IreA
Oxidoreductase activity	Afu3g10130	sarcosine oxidase, putative	IreA
Oxidoreductase activity	Afu6g10090	D-isomer specific 2-hydroxyacid dehydrogenase family protein	IreA
Oxidoreductase activity	Afu3g15350	short chain dehydrogenase family protein, putative	IreA
Oxidoreductase activity	Afu4g09920	conserved hypothetical protein	IreA
Oxidoreductase activity	Afu6g13350	NADPH oxidase (NoxA), putative	IreA
Oxidoreductase activity	Afu6g10230	FAD dependent oxidoreductase superfamily	IreA
Oxidoreductase activity	Afu5g13750	caleosin domain protein	IreA
Oxidoreductase activity	Afu3g14970	thioredoxin, putative	IreA
Oxidoreductase activity	Afu2g00830	short chain dehydrogenase/reductase	IreA
Oxidoreductase activity	Afu5g01000	oxidoreductase, 2OG-Fe(II) oxygenase family, putative	IreA
Oxidoreductase activity	Afu2g17620	cellobiose dehydrogenase	IreA
Oxidoreductase activity	Afu8g05850	FAD dependent oxidoreductase superfamily	IreA
Oxidoreductase activity	Afu1g17730	zinc binding enoyl reductase, putative	IreA
Oxidoreductase activity	Afu6g11630	FAD-dependent isoamyl alcohol oxidase, putative	IreA
Oxidoreductase activity	Afu8g05590	oxidoreductase, short chain dehydrogenase/reductase family	IreA
Oxidoreductase activity	Afu8g00540	hybrid polyketide synthase/nonribosomal peptide synthase, putative	IreA
Oxidoreductase activity	Afu6g02950	Catalytic LigB subunit of aromatic ring-opening dioxygenase, putative	IreA
Oxidoreductase activity	Afu1g13950	short-chain oxidoreductase, putative	IreA
Oxidoreductase activity	Afu8g02160	aldehyde dehydrogenase family protein	IreA
Oxidoreductase activity	Afu1g12210	NADH oxidase	IreA
Oxidoreductase activity	Afu5g11320	thioredoxin, putative	IreA
Oxidoreductase activity	Afu5g14350	c-24(28) sterol reductase	IreA
Oxidoreductase activity	Afu3g15140	isocitrate dehydrogenase family protein	IreA
Oxidoreductase activity	Afu4g00440	short chain dehydrogenase, putative	IreA
Oxidoreductase activity	Afu1g01180	isoamyl alcohol oxidase	IreA
Hydrolase activity	Afu5g09340	Phospholipase/Carboxylesterase superfamily	IreA
Hydrolase activity	Afu6g14600	beta-glucosidase, putative	IreA
Hydrolase activity	Afu8g06970	beta-glucosidase	IreA
Hydrolase activity	Afu1g16700	beta galactosidase, putative	IreA
Hydrolase activity	Afu5g12940	arylsulfatase, putative	IreA
Hydrolase activity	Afu6g08700	beta glucosidase, putative	IreA
Hydrolase activity	Afu1g17410	beta-glucosidase, putative	IreA
Hydrolase activity	Afu3g01910	cellobiohydrolase, putative	IreA
Hydrolase activity	Afu1g16110	arsenic methyltransferase Cyt19, putative	IreA
Hydrolase activity	Afu1g05290	endo-1,3(4)-beta-glucanase, putative	IreA
Hydrolase activity	Afu4g07720	carboxylesterase, putative	IreA
Hydrolase activity	Afu3g00380	beta-galactosidase, putative	IreA
Hydrolase activity	Afu3g10610	hypothetical protein	IreA
Hydrolase activity	Afu5g01480	Amidohydrolase family, putative	IreA
Hydrolase activity	Afu6g13450	nitrilase	IreA
Hydrolase activity	Afu3g02790	amidohydrolase family protein, putative	IreA
Hydrolase activity	Afu1g11250	amidohydrolase, putative	IreA
Hydrolase activity	Afu5g00480	fructan beta-fructosidase, putative	IreA
Hydrolase activity	Afu2g07520	leukotriene A4 hydrolase	IreA
Hydrolase activity	Afu2g03900	acetamidase/formamidase family protein	IreA
Hydrolase activity	Afu3g14580	dUTPase, putative	IreA
Hydrolase activity	Afu5g02130	alpha-galactosidase	IreA
Hydrolase activity	Afu1g14130	hypothetical protein	IreA
Hydrolase activity	Afu6g11600	endoglucanase, putative	IreA
Hydrolase activity	Afu1g12180	CaNAG6	IreA
Hydrolase activity	Afu6g11910	glycosyl hydrolase family 3, putative	IreA
Hydrolase activity	Afu5g09860	esterase, putative	IreA
Hydrolase activity	Afu2g05400	sugar hydrolase, putative	IreA
Hydrolase activity	Afu6g13610	endo-1,4-beta-xylanase, putative	IreA
Hydrolase activity	Afu1g13750	C2H2 transcription factor (Rpn4), putative	IreA
Hydrolase activity	Afu3g09460	hypothetical protein	IreA
Hydrolase activity	Afu5g13710	carboxylesterase, putative	IreA
Hydrolase activity	Afu3g14510	rhamnogalacturonan acetylesterase, putative	IreA
Hydrolase activity	Afu8g06480	rhamnogalacturonan acetylesterase superfamily protein	IreA
Hydrolase activity	Afu8g02530	extracellular lipase, putative	IreA
Hydrolase activity	Afu3g15210	endo-1,4-beta-xylanase, putative	IreA
Hydrolase activity	Afu5g00150	nonribosomal peptide synthetase, putative	IreA
Transferase activity	Afu3g01320	homocysteine S-methyltransferase, putative	IreA
Transferase activity	Afu3g05370	dihydrolipoamide succinyltransferase, putative	IreA
Transferase activity	Afu8g00520	integral membrane protein	IreA
Transferase activity	Afu7g04760	gamma-glutamyltranspeptidase	IreA
Transferase activity	Afu6g09640	aminotransferase GliI	IreA
Transferase activity	Afu2g00380	GNAT family acetyltransferase, putative	IreA
Transferase activity	Afu3g04220	fatty acid synthase beta subunit, putative	IreA
Transferase activity	Afu2g15860	methyltransferase, putative	IreA
Transferase activity	Afu2g09650	aspartate transaminase, putative	IreA
Transferase activity	Afu6g14040	glycosyl transferase, putative	IreA
Transferase activity	Afu3g10400	dolichol-phosphate mannosyltransferase, putative	IreA
Transferase activity	Afu5g06270	5-aminolevulinic acid synthase	IreA
Transferase activity	Afu4g09060	phosphatidate cytidylyltransferase, putative	IreA
Transferase activity	Afu1g16110	arsenic methyltransferase Cyt19, putative	IreA
Transferase activity	Afu5g15020	arsenic methyltransferase Cyt19, putative	IreA
Transferase activity	Afu4g10370	3-demethylubiquinone-9 3-methyltransferase	IreA
Transferase activity	Afu1g02140	glycogen debranching enzyme, putative	IreA
Transferase activity	Afu3g12910	O-methyltransferase (GliM), putative	IreA
Transferase activity	Afu6g07690	mRNA cap methyltransferase	IreA
Transferase activity	Afu4g09190	S-adenosyl-methionine-sterol-C- methyltransferas	IreA
Transferase activity	Afu7g00260	squalene-hopene-cyclase, putative	IreA
Transferase activity	Afu8g01250	acetyltransferase, GNAT family family	IreA
Transferase activity	Afu6g03310	hypothetical protein	IreA
Transferase activity	Afu3g06680	Lipoyltransferase, putative	IreA
Transferase activity	Afu1g09260	acetyltransferase, GNAT family family	IreA
Transferase activity	Afu1g17080	acetyltransferase, GNAT family, putative	IreA
Transferase activity	Afu4g14510	hypothetical protein	IreA
Transferase activity	Afu3g10750	acetate kinase, putative	IreA
Transferase activity	Afu1g10630	S-adenosylmethionine synthetase	IreA
Transferase activity	Afu3g12930	dimethylallyl tryptophan synthase (GliD), putative	IreA
Transferase activity	Afu6g07770	alanine aminotransferase, putative	IreA
Transferase activity	Afu8g06750	CHIP6	IreA
Transferase activity	Afu4g11510	mannose-1-phosphate guanylyltransferase	IreA
Transferase activity	Afu7g06080	ubiE/COQ5 methyltransferase, putative	IreA
Transferase activity	Afu1g11090	clr4 protein	IreA
Transferase activity	Afu4g07310	conserved hypothetical protein	IreA
Transferase activity	Afu4g13580	gamma-glutamyltranspeptidase	IreA
Transferase activity	Afu3g13700	transferase family protein	IreA
Transferase activity	Afu3g13680	conserved hypothetical protein	IreA
Transferase activity	Afu7g05590	DUF890 domain protein	IreA
Transferase activity	Afu3g03580	Transferase family superfamily	IreA
Transferase activity	Afu6g11620	formyltetrahydrofolate deformylase	IreA
Transferase activity	Afu4g12140	hypothetical protein	IreA
Transferase activity	Afu6g02570	conserved hypothetical protein	IreA
Transferase activity	Afu4g11280	DUF409 domain protein	IreA
Transferase activity	Afu3g12080	ADP-ribosylation factor 6, putative	IreA
Transferase activity	Afu7g04130	Trf5	IreA
Transferase activity	Afu6g04640	conserved hypothetical protein	IreA
Transferase activity	Afu6g08850	ubiquinone biosynthesis methlytransferase Coq5, putative	IreA
Transferase activity	Afu4g12760	SAM binding motif containing protein	IreA
Transferase activity	Afu6g03640	aminotransferase, putative	IreA
Transferase activity	Afu2g18040	dimethylallyl tryptophan synthase, putative	IreA
Transferase activity	Afu4g10840	conserved hypothetical protein	IreA
Transporter activity	Afu4g09560	ZIP Zinc transporter, putative	IreA
Transporter activity	Afu6g06730	l-fucose permease, putative	IreA
Transporter activity	Afu6g12040	maltose permease, putative	IreA
Transporter activity	Afu6g06680	hol1 protein, putative	IreA
Transporter activity	Afu1g12690	ABC multidrug transporter Mdr4	IreA
Transporter activity	Afu5g01630	major facilitator superfamily	IreA
Transporter activity	Afu7g05100	hexose transporter protein	IreA
Transporter activity	Afu5g12950	MFS quinate transporter, putative	IreA
Transporter activity	Afu2g15140	MSF drug transporter, putative	IreA
Transporter activity	Afu1g17440	ABC drug exporter AbcA	IreA
Transporter activity	Afu6g11380	mitochondrial import receptor subunit (Tom20), putative	IreA
Transporter activity	Afu4g09040	high affinity methionine permease	IreA
Transporter activity	Afu7g00710	oxalate/formate antiporter, putative	IreA
Transporter activity	Afu6g00440	cation diffusion facilitator 3	IreA
Transporter activity	Afu6g13780	multidrug resistant protein, putative	IreA
Transporter activity	Afu1g16280	mitochondrial F1F0-ATP synthase g subunit, putative	IreA
Transporter activity	Afu8g06580	GABA permease	IreA
Transporter activity	Afu7g00230	MFS multidrug transporter, putative	IreA
Transporter activity	Afu4g09360	ATP synthase proteolipid P2, putative	IreA
Transporter activity	Afu2g03860	plasma membrane low affinity zinc ion transporter, putative	IreA
Transporter activity	Afu2g12080	mitochondrial phosphate transporter, putative	IreA
Transporter activity	Afu7g05830	MFS sugar transporter, putative	IreA
Transporter activity	Afu1g15140	mitochondrial phosphate carrier protein (Mir1), putative	IreA
Transporter activity	Afu1g16230	MFS quinate transporter, putative	IreA
Transporter activity	Afu1g10390	ABC multidrug transporter, putative	IreA
Transporter activity	Afu7g06390	maltose permease	IreA
Transporter activity	Afu2g05320	ion transporter	IreA
Transporter activity	Afu1g03590	importin 11, putative	IreA
Transporter activity	Afu3g15380	conserved hypothetical protein	IreA
Transporter activity	Afu8g07240	MFS maltose permease, putative	IreA
Transporter activity	Afu3g15390	MFS transporter, putative	IreA
Transporter activity	Afu5g08130	Protein transport protein SEC61 alpha subunit, putative	IreA
Transporter activity	Afu4g00470	MFS multidrug transporter, putative	IreA
Transporter activity	Afu3g12720	sugar transporter-like protein	IreA
Transporter activity	Afu3g14170	high-affinity hexose transporter	IreA
Transporter activity	Afu3g13670	siderochrome-iron transporter, putative	IreA
Transporter activity	Afu2g16860	membrane transporter	IreA
Transporter activity	Afu5g00500	maltose permease, putative	IreA
Transporter activity	Afu5g13850	small oligopeptide transporter, OPT family	IreA
Transporter activity	Afu3g06730	MFS sugar transporter, putative	IreA
Transporter activity	Afu6g02220	MFS toxin efflux pump, putative	IreA
Transporter activity	Afu6g02000	NCS1 allantoate transporter	IreA
Transporter activity	Afu4g01560	MFS myo-inositol transporter, putative	IreA
Transporter activity	Afu1g17570	urea active transporter, putative	IreA
Transporter activity	Afu1g05390	mitochondrial ADP,ATP carrier protein (Ant), putative	IreA
Transporter activity	Afu1g02730	mitochondrial phosphate carrier protein (Ptp), putative	IreA
Transporter activity	Afu2g11580	mfs-multidrug-resistance transporter	IreA
Transporter activity	Afu2g11520	MFS monosaccharide transporter, putative	IreA
Transporter activity	Afu3g03440	MFS family siderophore transporter, putative	IreA
Transporter activity	Afu5g02700	multidrug resistant protein	IreA
Transporter activity	Afu6g00710	MFS transporter, putative	IreA
Transcription regulator activity	Afu3g11330	bZIP transcription factor (AtfA), putative	IreA
Transcription regulator activity	Afu2g09330	C6 finger domain protein, putative	IreA
Transcription regulator activity	Afu3g15340	hypothetical protein	IreA
Transcription regulator activity	Afu2g11840	transcriptional corepressor (Cyc8), putative	IreA
Transcription regulator activity	Afu7g06370	C6 transcription factor, putative	IreA
Transcription regulator activity	Afu1g15010	AMP binding domain protein, putative	IreA
Transcription regulator activity	Afu3g10930	bZIP transcription factor (MeaB), putative	IreA
Transcription regulator activity	Afu3g06170	mating type protein MAT1-2-1	IreA
Transcription regulator activity	Afu6g07780	Copper fist DNA binding domain protein	IreA
Transcription regulator activity	Afu6g07010	C6 transcription factor, putative	IreA
Transcription regulator activity	Afu6g12130	C6 transcription factor, putative	IreA
Transcription regulator activity	Afu4g06170	conserved hypothetical protein	IreA
Transcription regulator activity	Afu3g05760	C6 transcription factor (Fcr1), putative	IreA
Transcription regulator activity	Afu7g05080	C6 transcription factor, putative	IreA
Transcription regulator activity	Afu1g14280	C6 finger domain protein, putative	IreA
Transcription regulator activity	Afu3g12940	C6 transcription factor, putative	IreA
Transcription regulator activity	Afu1g16160	C6 transcription factor, putative	IreA
Transcription regulator activity	Afu5g08020	HLH DNA binding protein (Penr2), putative	IreA
Transcription regulator activity	Afu6g11640	fungal specific transcription factor, putative	IreA
Transcription regulator activity	Afu5g14530	C6 transcription factor, putative	IreA
Transcription regulator activity	Afu8g07180	C6 transcription factor, putative	IreA
Transcription regulator activity	Afu5g10130	bZIP transcription factor, putative	IreA
Transcription regulator activity	Afu4g10120	C6 finger domain protein, putative	IreA
Transcription regulator activity	Afu4g06530	bZIP transcription factor (MetR), putative	IreA
Transcription regulator activity	Afu7g01810	C6 transcription factor, putative	IreA
Kinase activity	Afu8g05980	protein kinase, putative	IreA
Kinase activity	Afu4g00960	6-phosphofructokinase alpha subunit	IreA
Kinase activity	Afu5g06470	serine/threonine protein kinase, putative	IreA
Kinase activity	Afu1g12940	MAP kinase (Osm1), putative	IreA
Kinase activity	Afu5g03490	nucleoside diphosphate kinase	IreA
Kinase activity	Afu6g12730	integral membrane protein	IreA
Kinase activity	Afu7g00740	protein kinase, putative	IreA
Kinase activity	Afu5g03950	protein kinase, putative	IreA
Kinase activity	Afu4g14650	ribokinase	IreA
Kinase activity	Afu5g06390	adenosine kinase	IreA
Kinase activity	Afu1g05800	MAP kinase kinase (Mkk2), putative	IreA
Kinase activity	Afu3g10530	protein serine/threonine kinase (Ran1), putative	IreA
Kinase activity	Afu6g05120	glycogen synthase kinase-3, putative	IreA
Kinase activity	Afu3g10750	acetate kinase, putative	IreA
Kinase activity	Afu1g11930	protein kinase, putative	IreA
Kinase activity	Afu7g05800	fructose-2,6-bisphosphatase	IreA
Kinase activity	Afu5g05510	cyclin-dependent protein kinase, putative	IreA
Kinase activity	Afu7g05410	thiamine pyrophosphokinase	IreA
Kinase activity	Afu1g01720	protein kinase/ribonuclease IRE1, putative	IreA
Peptidase activity	Afu7g05240	PROBABLE O-SIALOGLYCOPROTEIN ENDOPEPTIDASE	IreA
Peptidase activity	Afu5g04210	ubiquinol-cytochrome C reductase complex core protein 2, putative	IreA
Peptidase activity	Afu3g01220	aspartic-type endopeptidase, putative	IreA
Peptidase activity	Afu4g11800	alkaline serine protease Alp1	IreA
Peptidase activity	Afu5g11750	LON domain serine protease, putative	IreA
Peptidase activity	Afu1g05960	Peptidase family M28 family	IreA
Peptidase activity	Afu6g09650	membrane dipeptidase GliJ	IreA
Peptidase activity	Afu6g08640	metallopeptidase Mip1	IreA
Peptidase activity	Afu5g13300	aspartic endopeptidase Pep1	IreA
Peptidase activity	Afu5g14610	carboxypeptidase Y, putative	IreA
Peptidase activity	Afu8g00460	methionine aminopeptidase, type I, putative	IreA
Peptidase activity	Afu4g07270	serine carboxypeptidase, putative	IreA
Peptidase activity	Afu8g07080	elastinolytic metalloproteinase Mep	IreA
Peptidase activity	Afu2g07520	leukotriene A4 hydrolase	IreA
Peptidase activity	Afu3g06110	proteasome regulatory particle subunit (RpnC), putative	IreA
Peptidase activity	Afu5g09920	peptidase, putative	IreA
Peptidase activity	Afu5g04330	aminopeptidase, putative	IreA

## Sheet: 7
Locus	Common Name	ΔhacA / WT	ΔireA / WT
Afu5g02700	multidrug resistant protein	0.321978	-2.51941
Afu6g04920	NAD-dependent formate dehydrogenase	-1.87282	-1.99058
Afu5g03800	high-affinity iron permease CaFTR2	-1.3725	-1.72463
Afu7g06060	siderochrome-iron transporter (Sit1), putative	-1.0306	-1.60707
Afu1g17170	alpha-ketoglutarate-dependent taurine dioxygenase	-0.671231	-1.4994
Afu5g13300	aspartic endopeptidase Pep1	0.40537	-0.816451
Afu3g03440	MFS family siderophore transporter, putative	-0.401444	-0.790344
Afu3g03390	siderophore biosynthesis lipase/esterase, putative	-0.239676	-0.765412
Afu4g10100	FAD binding domain protein	-0.30413	-0.708327
Afu7g06080	ubiE/COQ5 methyltransferase, putative	-0.455814	-0.689496
Afu1g12690	ABC multidrug transporter Mdr4	-0.225825	-0.684655
Afu1g17270	ferric-chelate reductase (Fre2), putative	-0.0657549	-0.672752
Afu7g04730	siderochrome-iron transporter, putative	-0.606397	-0.604831
Afu1g17200	nonribosomal peptide synthase, putative	0.398976	-0.583097
Afu6g13590	3-isopropylmalate dehydrogenase	0.591939	-0.367529
Afu3g03360	hypothetical protein	0.778808	-0.251476
Afu3g03430	ABC multidrug transporter SitT, putative	-0.616514	-0.136607
Afu3g03350	nonribosomal peptide synthase, putative	1.35268	0.313866
Afu2g07680	L-ornithine N5-oxygenase SidA	-0.98083	0.438239
Afu3g03410	enoyl-CoA hydratase/isomerase family protein	-1.09246	0.76162
Afu1g03360	hypothetical protein	-0.140242	1.06689
Afu4g14070	glycosyl transferase, putative	1.74295	2.25799

## Sheet: 8
Locus	Common Name	ΔhacA / WT	ΔireA / WT	KEGG pathway
Afu1g02480	plasma membrane ATPase, putative	-0.0865593	-0.675048	Oxidative phosphorylation
Afu1g06610	NADH-quinone oxidoreductase, 23 kDa subunit, putative	0.0981317	0.935547	Oxidative phosphorylation
Afu1g06620	acyl carrier protein, putative	0.162568	-0.639199	Oxidative phosphorylation
Afu1g12290	possible NADH-ubiquinone oxidoreductase	-0.394141	-0.975287	Oxidative phosphorylation
Afu1g13480	ubiquinol-cytochrome C reductase complex subunit UcrQ, putative	-0.607219	-0.64336	Oxidative phosphorylation
Afu1g14520	pyridine nucleotide-disulphide oxidoreductase, putative	-0.865508	-0.662554	Oxidative phosphorylation
Afu1g16280	mitochondrial F1F0-ATP synthase g subunit, putative	-0.406401	-0.673064	Oxidative phosphorylation
Afu2g03010	cytochrome c subunit Vb, putative	-0.808869	-0.135131	Oxidative phosphorylation
Afu2g05450	64 kDa mitochondrial NADH dehydrogenase	-0.357248	-0.853352	Oxidative phosphorylation
Afu2g05500	NADH-ubiquinone oxidoreductase 18 kDa subunit, putative	-0.0972602	0.597186	Oxidative phosphorylation
Afu2g10600	NADH-ubiquinone oxidoreductase 299 kDa subunit, putative	-0.0876458	1.12613	Oxidative phosphorylation
Afu2g12260	cytochrome c oxidase assembly protein cox11	-1.22991	-0.53951	Oxidative phosphorylation
Afu2g12400	ATP synthase oligomycin sensitivity conferral protein, putative	-0.203701	0.668429	Oxidative phosphorylation
Afu2g15560	V-ATPase proteolipid subunit (Ppa1), putative	-0.688072	1.39658	Oxidative phosphorylation
Afu3g06190	Cytochrome c oxidase subunit VIa family	-1.10195	-1.72633	Oxidative phosphorylation
Afu3g07640	plasma membrane H+-ATPase	-0.0807201	-1.90864	Oxidative phosphorylation
Afu3g07810	succinate dehydrogenase, flavoprotein subunit	-0.327847	-0.752996	Oxidative phosphorylation
Afu3g14440	cytochrome c oxidase family protein	-0.855026	-1.51667	Oxidative phosphorylation
Afu4g06790	ubiquinol-cytochrome c reductase complex 14 kDa protein	-0.61675	-0.867384	Oxidative phosphorylation
Afu4g07150	cytochrome-c oxydase chain VIIc-like protein	-1.03784	-1.15889	Oxidative phosphorylation
Afu4g09360	ATP synthase proteolipid P2, putative	-0.246741	-1.08259	Oxidative phosphorylation
Afu4g11050	NADH-ubiquinone oxidoreductase, subunit F, putative	-0.371453	-0.648324	Oxidative phosphorylation
Afu4g11390	ubiquinol-cytochrome c reductase complex 17 kd protein	-0.378634	-0.809888	Oxidative phosphorylation
Afu5g00730	H /K ATPase alpha subunit, putative	0.493518	3.42563	Oxidative phosphorylation
Afu5g02750	cytochrome c oxidase subunit Va, putative	-0.735696	-1.40623	Oxidative phosphorylation
Afu5g03550	plasma membrane H(+)ATPase, putative	-0.276059	-1.41801	Oxidative phosphorylation
Afu5g04210	ubiquinol-cytochrome C reductase complex core protein 2, putative	-0.520378	-1.44673	Oxidative phosphorylation
Afu5g10550	ATP synthase F1, beta subunit, putative	-0.39602	-0.778099	Oxidative phosphorylation
Afu5g10560	cytochrome c oxidase subunit V	-0.627906	-0.914191	Oxidative phosphorylation
Afu5g10610	ubiquinol-cytochrome c reductase iron-sulfur subunit precursor	-0.400839	-0.922231	Oxidative phosphorylation
Afu6g02090	ATP synthase subunit E, putative	0.0209552	-1.27254	Oxidative phosphorylation
Afu6g02960	NADH-ubiquinone oxidoreductase 105 kDa subunit	-0.669644	-0.126117	Oxidative phosphorylation
Afu6g07670	cytochrome c oxidase assembly protein cox15	-1.08782	-1.93901	Oxidative phosphorylation
Afu6g08490	inorganic diphosphatase, putative	-0.699405	-0.199222	Oxidative phosphorylation
Afu1g03020	My026 protein	-0.631626	0.154139	N-Glycan biosynthesis
Afu1g14560	alpha-mannosidase	-1.23506	-0.963093	N-Glycan biosynthesis
Afu2g06280	oligosaccharyl transferase subunit (gamma), putative	-0.921381	1.17638	N-Glycan biosynthesis
Afu2g06300	nuclear division rft1 protein	0.0931933	1.2363	N-Glycan biosynthesis
Afu2g11080	glucosyltransferase (Die2), putative	-1.094	0.286917	N-Glycan biosynthesis
Afu2g11240	UDP-N-acetylglucosamine-dolichyl-phosphate N-acetylglucosaminephosphate transferase, putative	0.0948296	0.764109	N-Glycan biosynthesis
Afu3g10400	dolichol-phosphate mannosyltransferase, putative	-0.490138	-0.950687	N-Glycan biosynthesis
Afu4g08660	oligosaccharyltransferase subunit ribophorin II, putative	-0.403137	0.724587	N-Glycan biosynthesis
Afu4g10070	class I alpha-mannosidase	-0.0721076	0.65308	N-Glycan biosynthesis
Afu5g03500	alpha glucosidase II, alpha subunit, putative	-1.04133	0.0254603	N-Glycan biosynthesis
Afu5g08970	oligosaccharyl transferase subunit (beta), putative	-1.44188	0.187545	N-Glycan biosynthesis
Afu6g06790	mannosyl-oligosaccharide alpha-1,2-mannosidase	0.0258778	-0.618427	N-Glycan biosynthesis
Afu8g04430	oligosaccharyl transferase subunit (Stt3), putative	-0.96931	-0.276714	N-Glycan biosynthesis
Afu1g03150	c-14 sterol reductase	-0.650325	-1.68601	Steroid biosynthesis
Afu1g03950	cytochrome P450 sterol C-22 desaturase, putaitve	-0.0180762	-0.688542	Steroid biosynthesis
Afu1g07140	c-24(28) sterol reductase	-0.397378	-0.770101	Steroid biosynthesis
Afu2g00320	sterol delta 5,6-desaturase, putative	-0.706388	-0.675112	Steroid biosynthesis
Afu3g00810	cholestenol delta-isomerase, putative	-0.958943	-1.07485	Steroid biosynthesis
Afu4g06890	14-alpha sterol demethylase Cyp51A	-1.15377	-1.57253	Steroid biosynthesis
Afu4g08440	Patatin-like serine hydrolase, putative	0.659968	1.09669	Steroid biosynthesis
Afu4g09190	S-adenosyl-methionine-sterol-C- methyltransferas	0.0399401	-0.983641	Steroid biosynthesis
Afu4g14770	squalene-hopene-cyclase, putative	-0.192775	-0.771862	Steroid biosynthesis
Afu5g07780	squalene monooxygenase Erg1	-0.391671	-1.93333	Steroid biosynthesis
Afu6g05140	sterol delta 5,6-desaturase ERG3	-0.129042	-1.16836	Steroid biosynthesis
Afu7g00260	squalene-hopene-cyclase, putative	-0.186533	-0.791231	Steroid biosynthesis
Afu7g03740	14-alpha sterol demethylase Cyp51B	-0.867278	-0.508183	Steroid biosynthesis
Afu8g02440	C-4 methyl sterol oxidase, putative	-0.246505	-1.40309	Steroid biosynthesis
Afu3g07960	alpha-ketoglutarate-dependent taurine dioxygenase	-0.0530831	-1.08191	Taurine hypotaurine metabolism
Afu3g10750	acetate kinase, putative	-0.362303	-1.61994	Taurine hypotaurine metabolism
Afu3g11120	glutamic acid decarboxylase isoform 67	-0.252428	-1.00853	Taurine hypotaurine metabolism
Afu4g13580	gamma-glutamyltranspeptidase	0.0959077	-0.70701	Taurine hypotaurine metabolism
Afu6g10720	alpha-ketoglutarate-dependent taurine dioxygenase	-0.676598	-0.905135	Taurine hypotaurine metabolism
Afu7g04760	gamma-glutamyltranspeptidase	-0.273458	-1.17034	Taurine hypotaurine metabolism
Afu7g06030	alpha-ketoglutarate-dependent taurine dioxygenase	-1.06388	-1.02835	Taurine hypotaurine metabolism
Afu8g06020	glutamate decarboxylase	-0.456468	-1.22388	Taurine hypotaurine metabolism
